# Supplementary material for: Mapping of the Gynoecy in Bitter Gourd (Momordica charantia) Using RAD-Seq Analysis
Source: PLoS One. 2014 Jan 30;9(1):e87138. doi: 10.1371/journal.pone.0087138 (PMC3907450; doi:10.1371/journal.pone.0087138)
Supplement: Table S2 — List of putative bi-allelic tags between OHB61-5 and OHB95-1A. (XLSX) [file pone.0087138.s005.xlsx]

## Sheet: Sheet1
Table S2 List of putative bi-allelic tags between OHB61-5 and OHB95-1A
		Tag count in parental lines
Markers	Sequence of allelic tags	OHB95-1A	OHB61-5
GT1125	ATTAAAAATGTTATAGGTCTCGTAGAGAGAGTAAAAGTATGAAAGTAATTGCAATAAATATGTGGGATCC	50	0
	ATTAAAAATGTTATAGGTCTCGTAGAGAGAGTAAAATATGAAAGTAATTGCAATAAATATGTGGGATCCA	0	53
GT1126	ATTAAAACGTTTGATTTTTCTAAATAAAATTAAAGTGATAAACCATTTGTTTTATTTTTACTAAAAAGAT	50	0
	ATTAAAACGTTTGATTTTTCTAAATAAAATTAAAGTGATAAACAATTTGTTTTATTTTTACTAAAAAGAT	0	55
GT1129	ATTAAAGCTTGTAGCTTTTACACTAATTGTTTTTTTTTTTCTTTTTTCTTTTTTTGAAAAAGGCTTCCCT	50	0
	ATTAAAGCTTGTAGCTTTTACACTAATTGTTTTTTTTTTCTTTTTTCTTTTTTTGAAAAAGGCTTCCCTA	0	54
GT1140	ATTAATCACTTAAAAAATTCAATGGAAAAGTAGTTTTCTTACTGTTTATTAATATTTTTTTTAGTTCAGC	50	0
	ATTAATCACTTAAAAAATTCAATGGAAAAGTAGTTTTCTTACTGTTTATTAATATTTTTTTTATTTCAGC	0	60
GT1143	ATTAATTTTGTATTGTTTCAGCTAATTTATGAATGCACAAGTTTCTCGATCATTAGCTCACAAAATCATG	50	0
	ATTAATTTTGTATTGTTTCAGCTAATTTATGAATACACAAGTTTCTCGATCATTAGCTCACAAAATCATG	0	69
GT1144	ATTAATTTTTAATTTTAGTTTAGCAAATATGACGGATGAGACTTTGATTTTAAGGGAAGTAATAGATGTT	50	0
	ATTAAGTTTTAATTTTAGTTTAGCAAATATGACGGATGAGACTTTGATTTTAAGGGAAGTAATAGATGTT	0	92
GT1145	ATTAAAAAATAGAAAACAAGAACCAACAAACAAAAATTTCTTATTCTTGGTTTCTAGTTTTTGAGAAATA	51	0
	ATTAAAAAATAGAAAACAAGAACCAACGAACAAAAATTTCTTATTCTTGGTTTCTAGTTTTTGAGAAATA	0	51
GT1147	ATTAAAAGGTGTGATTTTGATTACCCACCTTGTTTTTAAGGAAAAAAGTTAAAAAGATGAAATGAAATAT	51	0
	ATTAAAAGGTGTGATTTTGATTATCCACCTTGTTTTTAAGGAAAAAAGTTAAAAAGATGAAATGAAATAT	0	63
GT1150	ATTAACGTTGGACTTTGTTTGCACTTCTTACAACTCCAACAACCACTTTACTTTACAAATCTTAAAAACT	51	0
	ATTAACGTGGGACTTTGTTTGCACTTCTTACAACTCCAACAACCACTTTACTTTACAAACCTTAAAAACT	0	74
GT1153	ATTAAAATGGCATAAAACTTGAGAGCAGTTAAGGATCCCATATTGAGAAGAGAAGAGATCTAAATAGACA	52	0
	ATTAAAATGGCATAAAACTTGAGAGCGGTTAAGGATCCCATATTGAGAAGAGAAGAGATCTAAATAGACA	0	52
GT1157	ATTAAATTTACCCAACCCGCCAGCTTAAGCTTTTGGGTTGAGTGATGGTCTATTCATCCTTAACAAAAGT	52	0
	ATTAAATTTATCCAACCCGCCAGCTTAAGCTTTTGGGTTGAGTGATGGTCTATTCATCCTTAACAAAAGT	0	132
GT1158	ATTAAATTTAGAGTCTTCAGCCTTTTAATTGATGCAATATTTACAAGCCCTAATCTACCATGTCGTATGC	52	0
	ATTAAATTTAGAGTCTTCCGCCTTTTAATTGATGCAATATTTACAAGCCCTAATCTACCATGTCGTATGC	0	50
GT1165	ATTAAAATAAAACACAATAAAGTAAAATACAATAATATAAAAAAAAAATTAAAAATAAGCCGGACCAAAT	53	0
	ATTAAAATAAAACACAATAAAGTAAAATACAATAATATAAAAAAAAATTAAAAATAAGCCGGACCAAATA	0	52
GT1183	ATTAAGCTATCAGCATTATTTTGGTTGTGAGCGTACTGATTTTATTCTTAATTCGTTATTTTGATTGTGA	53	0
	ATTAAGCTGTCAGCATTATTTTGGTTGTGAGCGTACTGATTTTATTCTTAATTCGTTATTTTGATTGTGA	0	51
GT1186	ATTAATCTAGGTTGAAAAAAATTATCATTTCTATAGGCCAAGAACTCTAAAATCTCAACTGCCTATCTCA	53	0
	ATTAATCTAGGTTGAAAAAAATTATCATTTCTATAGGCCAAGGACTCTAAAATCTCAACTGCCTATCTCA	0	74
GT1193	ATTAAATCGTTTTGGATTGATGAAAAAAAAACAATGAAAAACTTAAATAATATTTTGAGTGCAAAATTTC	54	0
	ATTAAATCGTTTTGAATTGATGAAAAAAAAACAATGAAAAACTTAAATAATATTTTGAGTGCAAAATTTC	0	52
GT1198	ATTAAGGTTAAAATACTGTACTGGTTCCTATATTTTCAACCTTGGTTCATTTTTGTTTATGTACTTTCGA	54	0
	ATTAAGGTTAAAATACTGTACTGGTTCCTATATTTTCAACCTTGGTTCATTTTTGTTTCTGTACTTTCGA	0	53
GT1207	ATTAAAAGTTCCAACAAGAACAGTTACCGACAAGATGATATAAAAAAAACAATAGATGACACCCCAAAAC	55	0
	ATTAAAAGTTCCAACAAGAACAGTTATCGACAAGATGATATAAAAAAAACAATAGATGACACCCCAAAAC	0	137
GT1209	ATTAAACTTACCATTAAAGATACCTATTAATGTCTGTTACTTTATATCTCATATTTTCCCCCGGACGGTA	55	0
	ATTAAACTTACCATTAAAGATACCTATTAATGTCTGTTACTTTATATCTCATATTTTCCCCGGACGGTAC	0	60
GT1217	ATTAAAAAAAGCCATATCAAAACAAGCCCTGAATTTAATTATCAATGTGAGCACAATTACTACCTTTCAA	56	0
	ATTAAAAAAAGCCATATCAAAACAAGCCCTGAATTTAATTGTCAATGTGAGCACAATTACTACCTTTCAA	0	57
GT1220	ATTAAAAGAATTAAATCATCTTTGGATGACCTAGTGATGAATAAGAGCCAAGGTAAATAGCAAATATCTT	56	0
	ATTAAAAGAATTAAATCATCTTTGGATGACCTAGTGATGAATAAGAGCCAATGTAAATAGCAAATATCTT	0	73
GT1222	ATTAAATTTCTTATAACAAAGGGATAATATGGCTTCAAGTCAATAAAACATACGGAGTTATGGAGTTATA	56	0
	ATTAAATTTCTTTTAACAAAGGGATAATATGGCTTCAAGTCAATAAAACATACGGAGTTATGGAGTTATA	0	70
GT1225	ATTAACTAACACCAATAAATTCAATGATTAATCAACAATAACCGTCATTAACTAAGTGGGTACTTAAATC	56	0
	ATTAACTAACACCAGTAAATTCAATGATTAATCAACAATAACCGTCATTAACTAAGTGGGTACTTAAATC	0	51
GT1228	ATTAATAGAAGAAATCCAATACTTATTGCATCTTTATACCTCTCCTATTATTCAGTTCATTTTTTACGAC	56	0
	ATTAATAGAAGAAATCCAATACTTATTGCATCTTTATACTTCTCCTATTATTCAGTTCATTTTTTACGAC	0	57
GT1236	ATTAATTGACAAAATGATGATGTAACATATCTTTTTAATTGAGTTGAAAATATTCTTTGTTTTAATTTGA	57	0
	ATTAATTGACAAAATGATGATGTAACATATCTTTTTAATTGAGTTGAAAATACTCTTTGTTTTAATTTGA	0	87
GT1238	ATTAATTTTGACGTGTCTTTGGGATGTTGTGGGGCAAGAGTGAAAGAGGCATCTCTCGTCTCTAGACTTT	57	0
	ATTAATTTTGACGTGTCTTTGGGACGTTGTGGGGCGAGAGTGAAAGAGGCATCTCTCGTCTCTAGACTTT	0	54
GT1242	ATTAAAAAGAAGAAGATATCCTTGTGGCCTTGAGATTTTTCCTAAATTCAGTACAAGATATCCTATATTC	58	0
	ATTAAAAAGAAGAAGATATCCTTGTGGCCTTGGGATTTTTCCTAAATTCAGTACAAGATATCCTATATTC	0	62
GT1247	ATTAAATTCTTAAGCAAGCAACGTATTAAAGAATATTTATGTTAAGAGTATTTATTTTGCATATTTTTGT	58	0
	ATTAAATTCTTAAGCAAGCAACATATTAAAGAATATTTATGTTAAGAGTATTTATTTTGCATATTTTTGT	0	77
GT1251	ATTAATCAATTAAAAAAAAAGAATTCGGCAACCCAACCCGACCCAACCCGAATTTATTGGGTTGGGTTGG	58	0
	ATTAATCAATTAAAAAAAAAAGAATTCGGCAACCCAACCCGACCCAACCCGAATTTATTGGGTTGGGTTG	0	50
GT1253	ATTAATTTATACCAAGTTCTAATCAACATATTAGACATACCAGACAAGCCTGTGCCTCCAACTTTTTGGC	58	0
	ATTAATTTATACCAAGTTCTAATCAACATATTAGACATACCAGACAAGCCTGTGCCTCCAACGTTTTGGC	0	76
GT1255	ATTAAAAAAAGAAATAAAAATAAAAATATGATTATATGTACCATTCGTTTCAACTGCCGCCCGAAAGAAT	59	0
	ATTAAAAAAAGAAATAAAAATAAAAATATGATTATATGTACCATTCGTTTCAACTGCCACCCGAAAGAAT	0	51
GT1257	ATTAAAGTATTTAACCACAAACTCTTGGTGATTTAGACTCACGTATATCAAATCATATCTTTTGGAGAAT	59	0
	ATTAAACTATTTAACCACAAACTCTTGGTGATTTAGACTCACGTATATCAAATCATATCTTTTGGAGAAT	0	68
GT1258	ATTAAATAGGACGTTGGGATAAAATATACTTTTTATAGAAAAAAGGAAAAATAATATAAATCCAACAAGA	59	0
	ATTAAATAGGACGTTGGGATAAAATATACTTTTTTATAGAAAAAAGGAAAAATAATATAAATCCAACAAG	0	64
GT1259	ATTAAATTAAACTTAAATTAATCGACTATATTAGAGTCGAATTCTACTATCCTTTCTCTCGTAATTTTGA	59	0
	ATTAAATTAAACTTAAATTAATCGACTATATTAGAGTCGAATTCTAATATCCTTTCTCTCGTAATTTTGA	0	50
GT1263	ATTAATTACACCAAACGTCAAGCAGTTAACAAACTAAATATAATCAATAGGCACAGTCAATATTAAAATG	59	0
	ATTAATTACACCAAACATCAAGCAGTTAACAAACTAAATATAATCAATAGGCACAGTCAATATTAAAATG	0	62
GT1268	ATTAAAACGAAAGCAAGTATGGAAGTTTATTAAAAAAAAAAAGGATAGGGCTTTTTTTCCCATAAGATTC	60	0
	ATTAAAACGAAAGTAAGTATGGAAGTTTATTAAAAAAAAAAAGGATAGGGCTTTTTTTCCCATAAGATTC	0	89
GT1270	ATTAAAATAACTAGACTACATAGCCAAATAACTCAAAATTTAACATATTTAAAGCCATCACGTGCCGATC	60	0
	ATTAAAATAACTAGACCACATAGCCAAATAACTAAAAATTTAACATATTTAAAGCCATCACGTGCCGATC	0	71
GT1272	ATTAAAGATGTATATTTTTGTTAAGAAGTCGTGCGTTTCAATCTGGACCCACGAGTTGTTGTATTAAAAA	60	0
	ATTAAAGATGTATATTTTTGTTAAGAAGTCTGTGCGTTTCAATCTGGACCCACGAGTTGTTGTATTAAAA	0	52
GT1273	ATTAAATAAAAGTAAGAAGATACAGATTTCCCTAGATTCAGGAGAAGATATCTTATATCAAAAAGGATAA	60	0
	ATTAAATAAAAGTAAGAAGATATAGATTTCCCTAGATTCAGGAGAAGATATCTTATATCAAAAAGGATAA	0	57
GT1275	ATTAAATGTACAGTCGCTGCTATGCTATGATGACTGTTTCATCTCAAATTCAATCTAATTTCTTTTAGGT	60	0
	ATTAAATGTACAGTCGCTGCTATGCTATGATGACTGCTTCATCTCAAATTCAATCTAATTTCTTTTAGGT	0	55
GT1276	ATTAACAGTAAAAATAAAATCGAGACCATTTGAGAACTATTTCTCAAATTTCAGGGACCAAAAGTGTTCA	60	0
	ATTAACAGTAAAAGTAAAATCGAGACCATTTGAGAACTATTTCTCAAATTTCAGGGACCAAAAGTGTTCA	0	54
GT1280	ATTAAAACCTTAAAATAAATATATACGAAATAACAAAAGAAAAATTGAAAAATTAGTGGAAGTTAAAGGA	61	0
	ATTAAAACTTTAAAATAAATATATACGAAATAACAAAAGAAAAATTGAAAAATTAGTGGAAGTTAAAGGA	0	57
GT1285	ATTAAGAAAGTTATTAGATTTATATTAAAATAAAGTATTTGTTATGTTTTGTGTTACCCTGTTACCTGCA	61	0
	ATTAAGAAAGTTATTAGATTTATATTAAAATAAAGTATTTGTTATGTTTTGTGTTACCCTGTTACTTGCA	0	57
GT1286	ATTAAGTATTAAAATAGACCCCTCCTATAATAAATTTGCATCTCCAAGATAAAGTGCGAGAAGTCAGAAG	61	0
	ATTAAGTATTAAAATAGACCCCTCCTATAATAAATTTGCATCTCCAAGATAAAGTGAGAGAAGTCAGAAG	0	50
GT1288	ATTAATATTTAGTATTTAACTCCTCTGCATTTTAGCAGAGGAGTGGGAAGTTTTATGACGTGAGTTTTAT	61	0
	ATTAATATTTAATATTTAACTCCTCTGCATTTTAGCAGAGGAGTGGGGAGTTTTATGACGTGAGTTTTAT	0	55
GT1290	ATTAATTCTACGCTGAAAAGATAAGAAATTTAACAAAAGTTGATAATGCAAGTGGACTACTCCTGTTACG	61	0
	ATTAATTCTACGCTGAAAATATAAGAAATTTAACAAAAGTTGATAATGCAAGTGGACTACTCCTGTTACG	0	52
GT1292	ATTAAACACATTGTAAAATACTAATTTTCATATTTAGAAATGAAATTTACCTGGCATCAATTTTACGTTA	62	0
	ATTAAACACATTGTAACCTACTAATTTTCATATTTAGAAATGAAATTTACCTGGCATCAATTTTACGTTA	0	59
GT1297	ATTAACACCATTGCAAAGGTCGATGGTTTGATCGCCACCTGCAATTCTTGAACTAAAAATAAAAATAAAT	62	0
	ATTAACACCATTGCAAAGGTCAATGGTTTGATCGCCACCTGCAATTCTTGAACTAAAAATAAAAATAAAT	0	72
GT1299	ATTAATTGGTGTAGTGAAACTGTTGATTATTTATAATAGCATTTGTGTATGTATCTATTGTTACTGAACT	62	0
	ATTAATTGGTGTAGTGAAACTGTTGATTATTTATAATAGCATTTGTGTATATATCTATTGTTACTGAACT	0	110
GT1303	ATTAAAGTAATGAAGAAATAGTCACAAACTATGCCGCGTTTCAAAAAAAAAAAAAGTTACCATATCACAT	63	0
	ATTAAAGTAATGAAGAAATAGTCACAAACTATGCCGCGTTTCAAGAAAAAAAAAAAGTTACCATATCACA	0	79
GT1304	ATTAAATTAAAACACTTTGACGATCTGTAGCAATAACTTCAGAAAGATCTGGCGGCCACTCCTCAACCCA	63	0
	ATTAAATTAAAATACTTTGACGATCTGTAGCAATAACTTCAGAAAGATCTGGCGGCCACTCCTCAACCCA	0	77
GT1307	ATTAAGATTTGATCCAACGAAGCAAGAAGAGAATAATATGAAGAATCCCAATTCCAATTCCCAAATCCAA	63	0
	ATTAAGATTTGATCCAACGAAGCAAGAAGAGAATAATATGAAGAATCCCAATTCCAATTCCCAAAACCAA	0	70
GT1310	ATTAATGTTATTAATTATTAACTCCCCTATATTTTAGTAGGATAGTGGGGAGTTTAATGACGTGGGGTAA	63	0
	ATTAATGTTATTAATTATTAACTCCCCTATATTTTAGTAGGGTAGTGGGGAGTTTAATGACGTGGGGTAA	0	56
GT1311	ATTAATTTAAATTGAACTAAGTTTGAATGTGGAAACTAATGATTTAACAGCTTGGGCTTTGGCTTAACCA	63	0
	ATTAATTTAAATTGATCTAAGTTTGAATGTGGAAACTAATGATTTAACAGCTTGGGCTTTGGCTTAACCA	0	110
GT1312	ATTAAAAAAAAAAAAGAAAAAAACTTGGATTTGGATATCCAAGAGGAAGCTAGAATAATAATATCATCTC	64	0
	ATTAAAAAAAAGAAAGAAAAAAACTTGGATTTGGATATCCAAGAGGAAGCTAGAATAATAATATCATCTC	0	78
GT1319	ATTAATCACGTCAACTTGAGTTACGTTCAACGGGTTAAGGCACCTATTTTCAACCAAAATATCGTGAATT	64	0
	ATTAATCACGTCAACTTGAGTTACGTTCAACGGGTCAAGGCACCTATTTTCAACCAAAATATCGTGAATT	0	85
GT1320	ATTAATGAAAGTGGGAGAACCTAATCTAAGGCCCCATTTACTTACACGCAATCGTAATCAATGAATCGTA	64	0
	ATTAATGAAAGTGGGAGAACCTAATCTAAGGCCCCATTTACTTACACACAATCGTAATCAATGAATCGTA	0	149
GT1329	ATTAATGAATATCTCAAAACAGAGGCTTTCTTGGCTCACAAAATATATTACATATTATCGATCTCTAGAG	65	0
	ATTAATGAATATCTCAAAACAGAGGCTTTCTTGGCTCACAAAATATATTACATATTATCGATCTCCAGAG	0	83
GT1331	ATTAAAACGAATAATTAAGTCGTACAAAGAGTTCTAGCTTGACCCTCTACTGTTTCGAGCGTGGGGAGTG	66	0
	ATTAAAACGAATAATTAAGTCATACAAAGAGTTCTAGCTTGACCCTCTACTGTTTCGAGCGTGGGGAGTG	0	65
GT1332	ATTAAAACGAATGTGTGACTCTAAAAAGCACTAAATTGACAAATTTGTTTCCATTATGATAAACTTATAA	66	0
	ATTAAAACGAATGTGTGACTCTAAAAAGCACTAAATTGACAAATTTGTTTCCATTATAATAAACTTATAA	0	68
GT1335	ATTAACAAGTTAAAGTATATGGATAAAATTGAAACATTAAAATATAGTAACAAACTTGATACAATTATGA	66	0
	ATTAACAAGTTAAAGTATATGGATAAAATTGAAACATTAAAATATAGTGACAAACTTGATACAATTATGA	0	57
GT1339	ATTAATTATAAATTTCCTTAGGAAAAATGTTTAATTGAGAAATAATTTTAAAAGTAAAAGAATAGAACGG	66	0
	ATTAATTATAAATTTCCTTAGGAAAAATGTTTAATTGAGAAATAATTTTAAAAGTAAAAGAATAGAACGA	0	63
GT1340	ATTAAAAACGTTATCTTGACCGGAATTATATAATTAGTCTCGATTTTGTAATCCGTTGGGATATATATTT	67	0
	ATTAAAAACGTTATCTTGACCTGAATTATATAATTAGTCTCGATTTTGTAATCCGTTGGGATATATATTT	0	81
GT1341	ATTAAAAAGTGTGTTTTTAGTGGCCTTATTCTTGTTTTTCGAATTGAAGAATTGTTGTACTGTATTTATG	67	0
	ATTAAAAAGTGTGTTTTTAGTGGCCTTATTCTTGTTTTTCGAATCGAAGAATTGTTGTACTGTATTTATG	0	93
GT1347	ATTAACTTAGACCCTATGTTTGTATGCAATTATTTATTATGGATTTTAATTTCTTTCTACCACATTTTAT	67	0
	ATTAACTTAGACCCTATGTTTGTATGCAATTCTTTATTATGGATTTTAATTTCTTTCTACCACATTTTAT	0	64
GT1361	ATTAACTGTTGTTGTTGATATGACAAACGTTTAGTTGATATGAAGAATGGAAATTTTGTTGTTAAATTGT	68	0
	ATTAACTGTTGTTGTTGATATGACAAACGTTTAGTTGATATGAAGAATGGAAATTTTTTTGTTAAATTGT	0	62
GT1362	ATTAAGAAAATTTAAAGATTCTGCTGTGTTGATTGCATTTAAAGTGTTAATATTTGTGTTTTCCTTTTTC	68	0
	ATTAAGAAAATTTGAAGATTCTGCTGTGTTGATTGCATTTAAAGTGTTAATATTTGTGTTTTCCTTTTTC	0	64
GT1365	ATTAAGTAATATATGTGTAGGTGATGGTACTTTTTTTCTCTCATCTGCTTGTCTCTTCCGCTCTCTTTCT	68	0
	ATTAAGTAATATATGTGTAGGTGATGGTACTTTTTTTCTCTCATCTGCTCGTCTCTTCCGCTCTCTTTCT	0	71
GT1367	ATTAATGCTGCGGTGTGATTTTCAGCAGACGCATTAAGTGTTCTAACGGTGAAACTTTTTTGAATCGTTC	68	0
	ATTAATGCTGCGGCGCGATTTTCAGCAGACGCATTAAGTGTTCTAACGGTGAAACTTTTTTGAATCGTTC	0	63
GT1369	ATTAAATCGTTTTGTATTGATGAAAAAAAAACAATGAAAAATGTAAATAATATTCTGAGTGCAAAATTTC	69	0
	ATTAAATCGTTTTGGATTGATGAAAAAAAAACAATGAAAAATGTAAATAATATTCTGAGTGCAAAATTTC	0	72
GT1372	ATTAAGTAGTTCGTAGCAAACAAAAGGAATGGGAGATCCATCCATCCCATTACAAAAGTTTTTTTTAGTA	69	0
	ATTAAGTAGTTCGTAGCAAACAAAAGGAACGGGAGATCCATCCATCCCATTACAAAAGTTTTTTTTAGTA	0	72
GT1373	ATTAATAATATTATTGTTGACTTCAACTCAAATATTTTAATAGTCAATTTGAATATAACCAAGTTGATAA	69	0
	ATTAATTATATTATTGTTGACTTCAACTCAAATATTTTAATAGTCAATTTGAATATAACCAAGTTGATAA	0	66
GT1374	ATTAATATTGAGATAAAGATACAAAACGATATAGTAGTAAATTGAGTGATGGATATCATCTTGAATGAGG	69	0
	ATTAATATTGAGATATAGATACAAAACGATATAGTAGTAAATTGAGTGATGGATATCATCTTGAATGAGG	0	65
GT1375	ATTAATTTGAGATTTACTCCAAAAAGCCAACAAAAATGACAACAACGAGTTGATTCCCACTAGGACCATC	69	0
	ATTAATTTGAGATTTACTCCAAAAGCCAACAAAAATGACAACAACGAGTTGATTCCCACTAGGACCATCA	0	90
GT1378	ATTAAATGGTTGGTTTTGTTTGGTTCGAAAGCAAATAGACTATAATAAAGGTCATTTTAAATTTTAGGTA	70	0
	ATTAAATGGTTGGTTTTGTTTGGTTGGAAAGCAAATAGACTATAATAAAGGTCATTTTAAATTTTAGGTA	0	62
GT1379	ATTAACCCTAGTCTTTTTAGACCAATGAGACATCCATGATGGTTAAATTTTTGTTTATTTAATCTTTATA	70	0
	ATTAAACCTAGTCTTTTTAGACCAATGAGACATCCATGATGGTTAAATTTTTGTTTATTTAATCTTTATA	0	55
GT1380	ATTAAGGTACATATTGTTGACAAAAAAATTGAAACGTTCAAATTTTCACCCCACATTTTGTTGAACTAAA	70	0
	ATTAAGGTACATATTGTTGACAAAAAAATTGAAACGTTTAAATTTTCACCCCACATTTTGTTGAACTAAA	0	90
GT1382	ATTAATAAGATGTTAGATTGAACTAAATATGTAGTTTGGTAACAACAAATATTTTACAAGACATTACTAA	70	0
	ATTAATAAGATGTTAGATTGAACTAAATATGTAGTTTGGTAACAACAAATATTTTACAAGATATTACTAA	0	51
GT1386	ATTAATTCTACAAAAACTTACAAATTTAAGTAAAAAAAAAAAAACCAACTGTAATGTATGTTTTTTAAAA	70	0
	ATTAATTCTACAAAAACTTACAAATTTAAGTTAAAAAAAAAAAAACCAACTGTAATGTATGTTTTTTAAA	0	50
GT1394	ATTAAATGCACCCATCGCATCCCCCTGCCTTGTTTCCTCTTACCACATTAAATCCCTCTAGTTTAGCCTT	71	0
	ATTAAATGCACCCATCGCATCCCCCTGCCTTATTTCCTCTTACCACATTAAATCCCTCTAGTTTAGCCTT	0	70
GT1397	ATTAATGTTATACAATAGTGAACAGTGTAAAGAAAAAAAAATATTTAAGTGATATACTCTCATTTATAAA	71	0
	ATTAATGTTATACAATAGTGAACAGTGTAAAGAAAAAAAATATTTAAGTGATATACTCTCATTTATAAAT	0	50
GT1400	ATTAAAGCATATGTAGAAAGACGATTTTTTAAGATTAATTTCTACGAGGATCTTTGAATTTCCTTTAAAA	72	0
	ATTAAAGCATATGTAGAAAGACGATTTTTTAAGATTAATTTCTACGAGGATCTTTGAATTTCCTTAAAAA	0	87
GT1407	ATTAACTCCACTACAACAAATTCGGCTTTTAATGACGAGCATTGCATTTGTACTCAGTCTATAAAATAAA	72	0
	ATTAACTCCACTACAACAAATTCGGCTTTTAATGACAAACATTGCATTTGTACTCAGTCTATAAAATAAA	0	84
GT1410	ATTAATAGTTTAAGTAATCAATTGTTAACCATTGGAGCTCAAAGTTATAGATTCATAAAGTCCCCCTACT	72	0
	ATTAATAGTTTAAGTAATCAATTGTTAACCATTGGAGCTCAAAGTTATAGATTCATAAGGTCCCCCTACT	0	61
GT1412	ATTAATCAAAAACCTTCTAATTTGAAGAATTGCTTACTTTTCCACTAATTAATTGTAATTAAAGAAAATA	72	0
	ATTAATCAAAAACCTTCTAATTTGAAGAATGGCTTACTTTTCCACTAATTAATTGTAATTAAAGAAAATA	0	56
GT1413	ATTAATTACATCATTTGATACCTCCAAAACTTTAAAAAAATTAAAAAAATTTAGCACAACAAATAGGGTG	72	0
	ATTAATTACATCATTTGATACCTCCAAAACTTTAAAAAAAATTAAAAAAATTTAGCACAACAAATAGGGT	0	77
GT1418	ATTAATTTTAAAGAAGTTTAAAATTAATTAGACCTTAGGTTATATCTTCTAATATAATTAGGGGGTAGTC	72	0
	ATTAATTTTAAAGGAGTTTAAAATTAATTAGACCTTAGGTTATATCTTCTAATATAATTAGGGGGTAGCC	0	82
GT1423	ATTAAGCCCCATAAACTTTAAACTTTACCCCCCAAAAAAAAAGCCCATAAGATTTTGATAGTATGTGTTG	73	0
	ATTAAGCCCCATAAACTTTAAACTTTACCCCCCCAAAAAAAAGCCCATAAGATTTTGATAGTATGTGTTG	0	85
GT1425	ATTAATAGTATATAAAAAAAAGAGTAGATGAAATTATTCTTTATAATATCTTTTTCGATGTCATAATCAA	73	0
	ATTAATAGTATATAAAAAAAGAGTAGATGAAATTATTCTTTATAATATCTTTTTCGATGTCATAATCAAA	0	63
GT1428	ATTAAATTGGAAGATATTTATCTCAACTTTTCTACAGTATCCTGACAGAGTTAGGGGCAACATTTTTTTT	74	0
	ATTAAATTGGAAGATATTTATCTCAACTTTTCTACAGTATCCTGACAGAGTTAGGGGCAACATTTTTTTA	0	91
GT1434	ATTAAAATTGTTTCAAATAAATTAAAAAAAACGGGAGGAAAACAATTAATTGTGAAAAGTTGGGAGGTTT	75	0
	ATTAAAATTGTTTCAAATAAATTAAAAAAAACGGGAGGAAAACAATTAATTGTGAAAAGTTGAGAGGTTT	0	51
GT1440	ATTAACATCATTCATCATTGAAGCTTAAAAGACTAGATAATAATATCTCAAAATATAATGGCCTATTTTA	75	0
	ATTAACATCATTCATCATTGAAGCTTAAAAGACTGGATAATAATATCTCAAAATATAATGGCCTATTTTA	0	55
GT1441	ATTAACATTCATTTACTACAGGTCACTCCACTAAAGACCCGCAGTTGCACTCTTCTCACTGCAGAATGTT	75	0
	ATTAACATTCGTTTACTACAGGTCACTCCACTAAAGACCCGCAGTTGCACTCTTCTCACTGCAGAATGTT	0	76
GT1442	ATTAACCATTAGTTTCGAGAAACCAACAGTATTAGAAATATACTCTTCCCAAAAATTTTATTGCTGTTTA	75	0
	ATTAACCATTAGTTTCGAGAAACCAACACTATTAGAAATATACTCTTCCCAAAAATTTTATTGCTGTTTA	0	79
GT1444	ATTAATATGACCTATGTGAGAGTAGAATTGGGTTGGTTCTATGAGAACTTTTCAAATGACTTATGTTCTC	75	0
	ATTAATATGACCTATGTGAGAGTAGAATTGGGTTGGTTCTATGAGAACTTTTCAAATGGCTTATGTTCTC	0	84
GT1445	ATTAATGAAATTAATTTTCTATTTCCTGTACATTCCATCCAGACCTATTATTTCTTTATAATTCTGCCAT	75	0
	ATTAATGAAATTAATTTTCTATTTCCTGTACATTCCATCCAGACCTATTATTTCTTTATAATTTTGCCAT	0	63
GT1451	ATTAAAATGTGTGCCAAACTCACCTAAGAATGGCCTTCAAAACTCCAAGCCGAGAGTGTCAATACATTAC	76	0
	ATTAAAATTTGTGCCAAACTCACCTAAGAATGGCCTTCAAAACTCCAAGCCGAGAGTGTCAATACATTAC	0	92
GT1452	ATTAAACCCTATTCACCCCCCCCCTAGGATTGTCATACCGATCCAACAATTGGTATCAGAGCAAGGTTGC	76	0
	ATTAAACCCTATTCACCCCCCCCCTAGGATTGCCATACCGATCCAACAATTGGTATCAGAGCAAGGTTGC	0	59
GT1453	ATTAAAGCTTTATCTGAATCATATTCAAACGTATATCTCTCTCATAACCTATAGTTTTAATGTGAATCTC	76	0
	ATTAAAGCTTTATTTGAATCATATTCAAACGTATATCTCTCTCATAACCTATAGTTTTAATGTGAATCTC	0	68
GT1457	ATTAATATTTTTCTATTTTTTGACAAACTGTATAACAAGTTATCTCTCTCTCGAATACATATTTAATATT	76	0
	ATTAATATTTTTCTATTTTTTGACAAACTATATAACAAGTTATCTCTCTCTCGAATACATATTTAATATT	0	71
GT1458	ATTAATGGTGCCTTTTTATGCGTTAATAAAATTTAATTGAGAAACTTGATTTTTATTAAATTAGATTGAT	76	0
	ATTAATGGTGCCTTTTATGCGTTAATAAAATTTAATTGAGAAACTTGATTTTTATTAAATTAGATTGATT	0	64
GT1462	ATTAAAAAATATTAGTACAATAATGCATTTGTAATTAGCTATAAATAAAAAGGGTTATATTATATAAATT	77	0
	ATTAAAAAATATTAGCACAATAATGCATTTGTAATTAGCTATAAATAAAAAGGGTTATATTATATAAATT	0	61
GT1466	ATTAACCGAATTTCTCTCTCAAACTAGGAGAAATTTTGATAAACCAAACCGTAGCGGGGCATAATGGTGT	77	0
	ATTAACCGAATTTCTCTCTCAAACTGGGAGAAATTTTGATAAACCAAACCGTAGCGGGGCATAATGGTGT	0	58
GT1470	ATTAATGGTCAACGTTAACTAAAAAGACTATTTGACCCAATAAATATCACGCTCATACCTCAAGATGTTA	77	0
	ATTAATGGTCAACGTTAACTAAAAAGACGATTTGACCCAATAAATATCACGCTCATACCTCAAGATGTTA	0	61
GT1476	ATTAATTATGAAATGCAAACTTGAAACAACAAATATATGGAGATACTTTTTTTTCCCAACATCTTGGAAA	78	0
	ATTAATTATGAAATGCAAACTTGAAACAACAAATATATGGAGATACTTTTTTTTTCCAACATCTTGGAAA	0	79
GT1485	ATTAACCTATTTAACATTTTTTTTTCAATTAACAGATCAGAGGCAATAATATTGAATTATAGAATCCCAA	79	0
	ATTAACCTATTTAACATTTTTTTTCAATTAACAGATCAGAGGCAATAATATTGAATTATAGAATCCCAAA	0	72
GT1486	ATTAACTACCTTAATTTGTTACTTGCCCAAATTTTGACTAATCAATTATAAGGCACATTGATTACCTAAT	79	0
	ATTAACTGCCTTAATTTGTTACTTGCCCAAATTTTGACTAATCAATTATAAGGCACATTGATTACCTAAT	0	105
GT1490	ATTAAAAACAAAAACAAAAAATGTTTTATAACCACTTTAATAATATTATTTTAGAATGATATATATATAT	80	0
	ATTAAAAACAAAAACAAAAAATGTTTTATAACCACTTTAATAATATTATTTTAGAATGATATATATATTT	0	53
GT1491	ATTAAAATACAATAATTTTTAAATAACTTTTATTACTAACATTATTAATAAAAAGGGGTGTATAATTTTT	80	0
	ATTAAAATACAATAATTTTTAAATAACTTTTATTATTAACATTATTAATAAAAAGGGGTGTATAATTTTT	0	51
GT1492	ATTAAAATGTCTCATATTTATAAAAAAAATATAGTCTATTCACGATTTAAGTTTTGGAACTTTCGAGACA	80	0
	ATTAAAATGTCTCATATTTATAAAAAAAATATAGTCTATTCACGATTTTAGTTTTGGAACTTTCGAGACA	0	69
GT1495	ATTAAGAAAATGTTCGCTTCCGTTTGGAGAGTCTTTGTAAAAAAATTTGTTTTGTATGAAAACGATCATA	80	0
	ATTAAGAAAATGTTCGCTTCCGTTTGGAGAGTCTTTGTAAAAAAATTTGTTTTGTATGAAAACGGTCATA	0	54
GT1496	ATTAATAAAACTCATAAAAATTATTCTAAAAAATATATGTTGATGAAAAAATCTGCGAGGGTACATACAA	80	0
	ATTAATAAAACTCATAAAAATTATTCTAAAAAATATATGTTGATGAAAAAATCTGCGAAGGTACATACAA	0	58
GT1498	ATTAATTATAGCTTGAAATCTCTATCTTTATCTATTGTGTTAAACTTAAAATTACAACGCGTTGAACAAT	80	0
	ATTAATTATAGCTTGAAATCTCTATCTTTATTTATTGTGTTAAACTTAAAATTACAACGCGTTGAACAAT	0	97
GT1499	ATTAATTTCATTATTAACTTGTACTCCACTATAAACTCAGAGTTGCACTTTTATATACTGTAGGACAATT	80	0
	ATTAATTTCATTATTAACTTGTACTCCACTATAAACCCGGAGTTGCACTTTTATATACTGTAGGACAATT	0	94
GT1500	ATTAAAATGTAAGAGATATATCTACCATACATATTGATTAGTACTCGATTACAAAAGAGATTATTATTAC	81	0
	ATTAAAATGTAAGAGATATATCTACCATAAATATTGATTAGTACTCGATTACAAAAGAGATTATTATTAC	0	62
GT1502	ATTAAGACTCAAATCCTTGGTTAGATTTAATTTAATGTTATTTTGTTTTTTTTAAGACAACAACACGTGT	81	0
	ATTAAGACTCAAATCCTTGGTTAGATTTAATTTAATGTTATTTTGTTTTTTTTTAAGACAACAACACGTG	0	84
GT1504	ATTAATACTCTTCCACCCACCATCATCCATCTTATATTTATTGTATTAAAAAAACAATACCCATTTATTT	81	0
	ATTAATACTCTTCCACCTACCATCATCCATCTTATATTTATTGTATTAAAAAAACAATACCCATTTATTT	0	58
GT1505	ATTAAAAGAGTTCCCTGTTTAGCTCTTAGCTGTTGGTATTTCTGTGACCTATCCAATAAAAAATAACTAA	82	0
	ATTAAAAGAGTTCCCTGTTTAGCTCTTAGCTGTTGGTATTTCTGTGACCTATCCAATAAAAAATAACTAC	0	101
GT1506	ATTAACTAGTGGAGAAATTTCCTCAATCAATAAATTGGACTTCTCTTCGGGGAGGATGTGAGGGTGTGGA	82	0
	ATTAACTAGTGGAGAAATTTCCTCAATCAATAAATTGGACTTCTCTTCGGGGAGGATATGAGGGTGTGGA	0	66
GT1507	ATTAAGAAATTTCAACACTAAGGTAGGTATGAAAACTATGGACAAAAGTAGGGTAGGCATCGGTCAAAAT	82	0
	ATTAAGAAATTTCAACACTAAGGTAGGTATGAAAACTATGTACAAAAGTAGGGTAGGCATCGGTCAAAAT	0	94
GT1509	ATTAATGGAGAGGGTAATTCATGATATATAGTGGTGACAATTATCTCCATTGTATGAAGTATTTTAGGTG	82	0
	ATTAATGGAGAGGGTGATTCATGATATATAGTGGTGACAATTATCTCCATTGTATGAAGTATTTTAGGTG	0	83
GT1510	ATTAATTACTGGAAGGGTGCCTCGATTAATGAATAATGCCAAATTTGATCACAATAATTTCTACAGAGTA	82	0
	ATTAATTATTGGAAGGGTGCCTCGATTAATGAATAATGCCAAATTTGATCACAATAATTTCTACAGAGTA	0	88
GT1512	ATTAATTTTGAGATAGAAACTTACAGATATTAAGATGACATCAGAGCCTAAAATGAACATCTAATTACCA	82	0
	ATTAATTTTGAGATAGAAACTTATAGATATTAAGATGACATCAGAGCCTAAAATGAACATCTAATTACCA	0	64
GT1514	ATTAATTTTTTTGTGCTTTACCTAGTAGTGTTTTCACTTAAATTTCAAACTCAGCCTTTAGAAGTTGTAT	82	0
	ATTAATTTTTTTGTGCTTTACCTAGTAGTGTTTTCACTTAAATTTCAAACTCGGCCTTTAGAAGTTGTAT	0	134
GT1518	ATTAATTTAGATTTCAAACTAAACACATTAAACTAAAAATCTTCTTCCTTATGTAGTAGTTGGTAATGGG	83	0
	ATTAATTTAGATTTCAAACCAAACACATTAAACTAAAAATCTTCTTCCTTATGTAGTAGTTGGTAATGGG	0	110
GT1519	ATTAATTTTTTAATCTTGCTTTTGGTTTTGCATTAGATTGATTAATCACCTTTCCTTCCCATTGGGCTGA	83	0
	ATTAATTTTTTAATCTTGCTTTTGGTTTTGCATTAGATTGATTAATCACCTTTCCTTCCCTTTGGGCTGA	0	148
GT1522	ATTAAACAAAAATCCATTCTAAGTGAGTGGTTACCTACTAACTCACACTAAAACCCCTTGGGTTAAGAGT	84	0
	ATTAAACAAAAATTCATTCTAAGTGAGTGGTTACCTACTAACTCACACTAAAACCCCTTGGGTTAAGAGT	0	59
GT1526	ATTAACCTTAACATTTCTCAATCCATTCTGATTCTGAAATATTTTGAAAGTTTCCAATTATTTTCTTTTG	84	0
	ATTAACCTTAACATTTCTCAATCCATTCTGATTCTGAAATATTTTGAAAGTTTCCATTTATTTTCTTTTG	0	108
GT1527	ATTAAGTATGATATACGTAAATCAAATCTCAATCCATCTTTTTTTTTTAATCAAAACAAAATAAGTCTAT	84	0
	ATTAAGTATGATATACGTAAATCAAATCTCAATCCATCTTTTTTTTTAATCAAAACAAAATAAGTCTATT	0	83
GT1529	ATTAAAAAGAAAAAAGAAACAAAAACAATAAAGGAGAACGTTAACAAACGCAACCTTATATTTCAATCTA	85	0
	ATTAAAAAGAAAAAAGAAACAAAAACAATAAACGAGAACGTTAACAAACGCAACCTTATATTTCAATCTA	0	68
GT1530	ATTAAAATTAAGCCTTTAAACTTAACATAAATAGAGAAATTGGTCTTTATCGATGACTCGATTAAACTTT	85	0
	ATTAAAATTAAGCCTTTAAACTTAACATAAATAGAGAAATGGGTCTTTATCGATGACTCGATTAAACTTT	0	83
GT1532	ATTAAAGTAATTCTCTTATAAGGGAAAAAAACAGCCTATCCCGAAATGAAAATTCTGAAATCTACCACTC	85	0
	ATTAAAGTAATTATCTTATAAGGGAAAAAAACAGCCTATCCCGAAATGAAAATTCTGAAATCTACCACTC	0	79
GT1533	ATTAAATAAATAATATTTTTTTTTAAAAACAAGTCAGCCCAAATACGATAAGTAAATTAAGCCAACCAAA	85	0
	ATTAAATAAATAATATTTTTTTTAAAAACAAGTCAGCCCAAATACGATAAGTAAATTAAGCCAACCAAAA	0	70
GT1534	ATTAAATTAGATAAAAATAGCTTGCCCCACTTAATTTATTTTTAGTATTTTTGAAAAATGACAAAATAAA	85	0
	ATTAAATTAGATAAAAAAAGCTTGCCCCACTTAATTTATTTTTAGTATTTTTGAAAAATGACAAAATAAA	0	60
GT1538	ATTAAGATTTCATAATCTAGTATTAGATCTAATTGTTTATTATACTTCTTATGAAGAAACGTTGTGCTAT	85	0
	ATTAAGATTTCATAATCTAGTATTAGATCTAATTGTTTATTATACTTCTTATGAAAAAACGTTGTGCTAT	0	62
GT1540	ATTAATTGAGTTTGACTAAAACGAGCATAGCTTAACGGTAATTGACATGTACTTCCAATCATGAGGGATT	85	0
	ATTAATTGAGTTTGACTAAAACGAGCATAGCTTAACCGTAATTGACATGTACTTCCAACCATGAGGGATT	0	52
GT1541	ATTAAAAAATTAAATGTTCAAGTGGCACCTCAACCACCCAGCAAGTTGGTAATCCCAAGCCAAATAGAAA	86	0
	ATTAAAAAATTAAATGTTCAAGTGGCACCTCAACCACCCAGGAAGTTGGTAATCCCAAGCCAAATAGAAA	0	95
GT1542	ATTAAAAATAATCTTAAAAAATAATTAGCATAAATTAAATTCAAAATAATATATTTATCTCCGATCCAAT	86	0
	ATTAAAAATAATTTTAAAAAATAATTAGCATAAATTAAATTCAAAATAATATATTTATCTCCGATCCAAT	0	61
GT1543	ATTAAAAATCTCCTTCAAAACTTGATAACTTAATTTATCTTAATCCAACGAAATTGAACTTAAATTATAG	86	0
	ATTAAAAATCTCCTTCAAAACTCGATAACTTAATTTATCTTAATCCAACGAAATTGAACTTAAATTATAG	0	80
GT1546	ATTAACAGTAAAAAAAAATCATTGACCATCTAGAACTATATCTCAAACTTCTGGGACCAAAAGTGTTTAT	86	0
	ATTAACAGTAAAAAAAATCATTGACCATCTAGAACTATATCTCAAACTTCTGGGACCAAAAGTGTTTATT	0	75
GT1548	ATTAAGTGAAAACATTTCTATTTTTCCTTTTCAAACAAAATTGAGCTTTCATCTGCATATTGAAGATCCA	86	0
	ATTAACTGAAAACATTTCTATTTTTCCGTTTCAAACAAAATTGAGCTTTCATCTGCATATTGAAGATCCA	0	71
GT1552	ATTAAAAATATTGTAGTTCAAAAAAATTGAAGGCTAGTCGTCTCGACCATCTACGGGTCTCTCGAGGAGA	87	0
	ATTAAAAATATTGTAGTTCAAAAAAATTGAAGGCTAGTCGTCTCGACCATCTACGGGTCTCTCGAAGAGA	0	89
GT1553	ATTAAAAGATGGTGTGTGTGGGGAGAGCTATTATAATTTATAAGTATATTAATTAGAGTGATCAAGTCTA	87	0
	ATTAAAAGATGGTGTGAGTGGGGAGAGCTATTATAATTTATAAGTATATTAATTAGAGTGATCAAGTCTA	0	91
GT1556	ATTAAATAAAAAAAATTTGAATCATTTTCAAATATACATTTCAACCTATAATATTTAATATGAATCCAAT	87	0
	ATTAAATAAAAAAAATTTGAATCATTTTCAAATATGCATTTCAACCTATAGTATTTAATATGAATCCAAT	0	94
GT1558	ATTAACATCTTTTCAAAAGAAAGATGAAAAGAAAAGAAAGGGATCATTCATTATGGAGCCGTTTGGTAAC	87	0
	ATTAACATCTTTTCAAAAGAAAGATGAAAAGAAAAGAAAGGGATCATTCATTAGGGAGCCGTTTGGTAAC	0	78
GT1561	ATTAAGTAGTTGGTTCATATATTCAATAGGTGAAATCAATTCCCTAGGACATTTCTCCCCATTGTTTTTA	87	0
	ATTAAGTAGTTGGTTCATATGTTCAATAGGTGAAATCAATTCCCTAGGACATTTCTCCCCATTGTTTTTA	0	109
GT1563	ATTAATTATTTATTTATTGGTAGAGACGTATATCTCCAACCAAGAGGTTGTAAGTTCGATCCCAAACCCT	87	0
	ATTAATTATTTATTTGTTGGTAGAGACGTATATCTCCAACCAAGAGGTCGTAAGTTCGATCCCAAACCCT	0	87
GT1565	ATTAAAAAATTAATGACAACGGTAACAACGAGAACCTAATATTAATGATTATAATAGACATTTTGAATAC	88	0
	ATTAAAAAATTAATGACAACGGTAACAACGAGAACCTAATATTAATGATTATAATAGACATTTTGAATGC	0	96
GT1566	ATTAAAATTTATAATAAAGTATACTTATATTATTTTTACCAAAAACAATTAAACAAAATTTAGTAAAATA	88	0
	ATTAAAACTTATAATAAAGTATACTTATATTATTTTTACCAAAAACAATTAAACAAAATTTAGTAAAATA	0	70
GT1567	ATTAAAATTTTCAAGTTCTCCAGAAAGAAAAAAATAAAATTTAAACAAAATATGACAATTACAGCATTGT	88	0
	ATTAAAATTTTCAAGTTCTCCAGAAAGAAAAAAATAAAATTTAAACAAAATATGACAATTACAGCATTGG	0	107
GT1568	ATTAAAGAAAAATCTACACTAAAACCAGTCTCTATAATGGGTATAAGAAACAGAACTCGCAAATGTACCA	88	0
	ATTAAAGAAAAATCTACACTAAAACCAGTCTCTATAATGGGTATAAGAAACAGAACTCACAAATGTACCA	0	90
GT1569	ATTAAAGGAAGCTTCTTTGAAATTTAAAAGAGGACAGTGTTACGGTAGAGAGAAGTCAAGTTCAAAGTTA	88	0
	ATTAAAGGAAGCTTCTTTGAAATTTAAAAGAGGACAGTGTTACGTTAGAGAGAAGTCAAGTTCAAAGTTA	0	112
GT1570	ATTAACACACATAGTCAATCAATATAGGAAAATAATATTATACGAGTTTGAAGACTTTCTCTCATACCAT	88	0
	ATTAACACACATAGTCAATCAATATAGGAAAATAATATTATACGAGTTTGAAGACTTGCTCTCATACCAT	0	92
GT1571	ATTAACATTTTCTAAAACTTTATTATTTAAATTCCCCTGCATTTATACGATCTTATAATATTTTTAAATT	88	0
	ATTAACATTTTCTAAAACTTTATTATTTAAATTCTCCTGCATTTATACGATCTTATAATATTTTTAAATT	0	84
GT1573	ATTAAGTAATTGGTTCATAGATTCAATAGGTGAAATCAATTCCCTAGGACCTTTCTCCCCATTGTTTTTA	88	0
	ATTAAGTAGTTGGTTCATAGATTCAATAGGTGAAATAAATTCCCTAGGACCTTTCTCCCCATTGTTTTTA	0	87
GT1574	ATTAATAAATTGTTTTTATAAATAAAAGAGGGGGTTTTTTTCCGCATTTGAAGCTTAATTTTGTAATCAA	88	0
	ATTAATAAATTGTTTTTATAAATAAAAGAGGGGGTTTTATTCCGCATTTGAAGCTTAATTTTGTAATCAA	0	63
GT1575	ATTAATATTAATATTTCTCATTCCAACTTGATGACTATTGAATACTTTTTCTAGTAATTTTTTTTGGGTT	88	0
	ATTAATATTAATATTTCTCATTCCAACTTGATGACTATTGAATACTTTTTTTAGTAATTTTTTTTGGGTT	0	104
GT1576	ATTAATTTGACACGAGTCAAAACCATAAATAAATATCATATATTTTGATTCTAAATTATGTTTTTTCAAG	88	0
	ATTAATTTGACACGAGTCAAAACCATAAATAAATATCATATATTTTGATTCCAAATTATGTTTTTTCAAG	0	80
GT1578	ATTAAAAAATTAAAATATGATAAGATTAAATAAAGTAATTTTTTTTAAATTTATATGAAATCCTGCCAAA	89	0
	ATTAAAAAATTAAAATATGATAAGATTAAATAAAGTAATTTTTTTTAAAATTATATGAAATCCTGCCAAA	0	76
GT1579	ATTAAACTCTATTCACCCCCCCTCTAGGGTTGCCATACCGATCCAACAATTGGTATCAGAGCGAGGTTGC	89	0
	ATTAAACTCTATTCACCCCCCTCTAGGGTTGCCATACCGATCCAACAATTGGTATCAGAGCGAGGTTGCT	0	82
GT1580	ATTAAAGGCGCGACCTCAAAAGTACGAGGTGCGAGGTGACATTGGCTTCCGCTTAAAGAAAAAGCAAAGA	89	0
	ATTAAAGGCGCGACCTCAAAAGTACGAGGTGCGAGGTGACATTGGCTTCAGCTTAAAGAAAAAGCAAAGA	0	82
GT1581	ATTAACCATCCTTAGGTTCCTAAGTAAGTACTCAACTAGTAAGAGATTTTGAAGATTCAAAATCAATACA	89	0
	ATTAACCATCTTTAGGTTCCTAAGTAAGTACTCAACTAGTAAGAGATTTTGAAGATTCAAAATCAATACA	0	103
GT1582	ATTAACTGATATATTTTTTAGTATAATAAATAAGAGTGGAGGATTTGAATTCATGATCTCTTCGTTAGAG	89	0
	ATTAACTGATATATTTTTTAGTATAATAAATAAGAGTGGAGGATTTGAACTCATGATCTCTTCGTTAGAG	0	51
GT1583	ATTAAGTAATTGGTTCATAAAATCAATAGGTGAAATCAATTCCTTAGGACCTTTCTCCCTATTGTTTTTA	89	0
	ATTAAGTAAATGGTTCATAAAATCAATAGGTGAAATCAATTCCTTAGGACCTTTCTCCCTATTGTTTTTA	0	95
GT1584	ATTAAGTTTTGAGACTGGTTCAAAATGTTGCGGTAATTAATCTAATCCTTACTTAAAAGAGACACGTCGT	89	0
	ATTAAGTTTTGAGACTGGTTCAAAATGTTGCGGTAATTAGTCTAATCCTTACTTAAAAGAGACACGTCGT	0	121
GT1585	ATTAATAAACATATTTGATCACTCTTTAATTTATCAATATAGTTAACAAGAAAATTTCACAATAAACTAA	89	0
	ATTAATAAACATATTTGGTCACTCTTTAATTTATCAATATAGTTAACAAGAAAATTTCACGATAAACTAA	0	58
GT1586	ATTAATAGATTAATATTTCAATACAATGACGAGGTAACTCGATCTCAATCCTAAGTGAGTTATGGACTCC	89	0
	ATTAATAGATTAATATTTCAATACAATGACGAGGTAACTCGATCTCAATCCTGAGTGAGTTATGGACTCC	0	58
GT1587	ATTAATATTAAATAAAATTAATAAATCATTCCCTTACTCAATTGTAGGGGAGTGGGCGGTTATTGTTGAC	89	0
	ATTAATATTAAATAAAATTAATAAATCATTCCCTTACTCAATTGTAGGGGAATGGGCGGTTATTGTTGAC	0	56
GT1588	ATTAAAAGGGATTTTGTTTTCATTAAAACTGATTTGTTAAAATTAGTTTTTATTTCCTCCTTTCCCTCGT	90	0
	ATTAAAAGGGATTTTGTTTTCACTAAAACTGATTTGTTAAAATTAGTTTTTATTTCCTCCTTTCCCTCGT	0	90
GT1590	ATTAAATAAAAAGAAGAAGATATCCTGATGGTCTTGGGATTTCCCCTAAATTCAGTAGAAGATTCCTCCT	90	0
	ATTAAATAAAAAGAAAAAGATATCCTGATGGTCTTGGGATTTCCCCTAAATTCAGTAGAAGATTCCTCCT	0	76
GT1591	ATTAAATATTATTGACGTTGGATTCTAACTTGCGCGGCACATCAAAAGTAATTTGAGGTGGACTCTGATG	90	0
	ATTAAATATTATTGACGTTGGATTCTAACTTGCGCGACACATCAAAAGTAATTTGAGGTGGACTCTGATG	0	151
GT1593	ATTAAGATTATGTTAAACATATAATTGAATAATTGAAATTCGATGTCACCAAAGTAACCTCTGTTGTAGA	90	0
	ATTAAGATTATGTTAAACATATAATTGAATAATTGAAATTCGATGTCACCAAAATAACCTCTGTTGTAGA	0	65
GT1594	ATTAATACGCTGTATAAGTTATACCGTAAATTAGTTAGGTTTTATTACTAGTTGATGTGTTACTATAGAT	90	0
	ATTAATACGCTCTATAAGTTATACCGTAAATTAGTTAGGTTTTATTACTAGTTGATGTGTTACTATAGAT	0	58
GT1596	ATTAATTTTTATACTTTTAAACTTTAAAATAAAACTATGAAATTCGCACGTGTTTCTGACTAGTAAGATA	90	0
	ATTAATTTTTATACTTTTAAACTCTAAAATAAAACTATGAAATTCGCACGTGTTTCTGACTAGTAAGATA	0	65
GT1597	ATTAAAATAATTTTTTTCCTTTTAAAAACAAATATAAATACTTCCAAATTATTACAACAATTGCAAAAGT	91	0
	ATTAAAATAATTTTTTTTCCTTTTAAAAACAAATATAAATACTTCCAAATTATTACAACAATTGCAAAAG	0	72
GT1598	ATTAAAGGCGCTGCAATCGATTCGAATTTCGCCAGCCTGGCCCGTCTTGACCCCGACCCGACCCATCTTA	91	0
	ATTAAAGGCGCTGCAATCGATTCGAATTTCGCCAGCCTGGCCCGTCTTGACCCCGACCCGACCCATCTTG	0	114
GT1601	ATTAATTGTGCTGGACTCAAATTAACTATTATTAAAATACTTTGGATCTTAGGTTCTCATTTGATTATTA	91	0
	ATTAATTGTGCTGGACTCAAATTAACTATTATTAAAATACTTTGGATCTTAGGTTCTCGTTTGATTATTA	0	117
GT1603	ATTAAAAATATATACTAATTACTATTAAATTAAACCTATTTTAACAATATTATTAGATACACGGTCGGAT	92	0
	ATTAAAAATATATACTAATTACTACTAAATTAAACCCATTTTAACAATATTATTAGATACACGGTCGGAT	0	65
GT1604	ATTAAAAGAAAAAAAAAAAGATGATAATAAATTTAACAGCAATAAAATCAAAACAAGTTTTTATTCCTCA	92	0
	ATTAAAAGAAAAAAAAAAGATGATAATAAATTTAACAGCAATAAAATCAAAACAAGTTTTTATTCCTCAT	0	100
GT1605	ATTAAACCGCACTTTCAAATGGTTAAATATATGGTTTTATATTTTCCATTTATTTTATCTGATAATTTAA	92	0
	ATTAAATCGCACTTTCAAATGGTTAAATATATGGTTTTATATTTTCCATTTATTTTATCTGATAATTTAA	0	91
GT1606	ATTAAATGTGATTATTATTATTTTTTATTTTTTGGAAAAAGAAATGTGATATATTTGTTAGTTGTTGAAT	92	0
	ATTAAATGGGATTATTATTATATTTTATTTTTTGGAAAAAGAAATGTGATATATTTGTTAGTTGTTGAAT	0	90
GT1609	ATTAATAAATCTATTAAAAACAAAAATGAATTTCGTGTGGAATGGGATAAATTTTCAATTTTCTGTTTAA	92	0
	ATTAATAAATATATTAAAAACAAAAATGAATTTCGTGTGGAATGGGATAAATTTTCAATTTTCTGTTTAA	0	86
GT1611	ATTAAATAATTTTCGAAGGTTTCTCAAAATATCTTTAATAAAGGTTGACCTTTTTCGAAGGTTTTTAATA	93	0
	ATTAAATAATTTTCGAAGGTTTCTCAAAATACCTTTAATAAAGGTTGACCTTTTTCGAAGGTTTTTAATA	0	68
GT1612	ATTAATATTGAGGTGAGATACAAAAAGATATATTAGTAAATTGGGTGATGTGTACCATCCTAAATGAGGT	93	0
	ATTAATATTGAGGTGAGATACAAAAGGATATATTAGTAAATTGGGTGATGTGTACCATCCTAAATGAGGT	0	111
GT1613	ATTAATTACTTATTACTTGAACACTTATCTTTTTATATATTATGAATAAAACTTTTGGCATCTAAAATAT	93	0
	ATTAATTACTTATTACTTGAACAATTATCTTTTTATATATTATGAATAAAACTTTTGGCATCTAAAATAT	0	79
GT1614	ATTAAACCATTTTCACCCCCTCTAAGGTTGCCATACCGATTCAACAATTGGTATCAGAGCAAGATTGCTC	94	0
	ATTAAACCATTTTCACCCCCTCTAAGGTTGCCATACCGATCCAACAATCGGTATCAGAGCAAGATTGCTC	0	107
GT1616	ATTAAATTATATGTTAGATACACGTTAGTCAATGGTCGTTTGGTAACATTCCCGTTTCTTATTTTGTCGT	94	0
	ATTAAATTATATGTTAGATACACGTTAGTCAATGGTCGTTTGGTAACATTCTCGTTTCTTATTTTGTCGT	0	99
GT1617	ATTAACAGAGCATTTCTTCGTTAAAATAATTATGGGGGAAAGGGTCGAATTTTCCTAGGGTCTTCTTATA	94	0
	ATTAACAGAGCATTTCTTTGTTAAAATAATTATGGGGGAAAAGGTCGAATTTTCCTAGGGTCTTCTTATA	0	155
GT1619	ATTAAGCTAGTATGGTATTTAAGAATGCCTTTTTAAAGAATATGTTACACAAATCCATTTTCTATACACA	94	0
	ATTAAGCTAGTATGGTATTTAAGAATGCCTTTTTAAAGAATATATTACACAAATCCATTTTCTATACACA	0	79
GT1620	ATTAATTTAGAAAGTATAGTCTTATTAGACAAGCCATTCACATAAAGTTTTGGACTCGTCATTTAATGAC	94	0
	ATTAATTTAGAAAGTATAGTCTTATTAGACAAGTCATTCACATAAAGTTTTGGACCCGTCATTTAATGAC	0	97
GT1621	ATTAAGTCTCTCCCTCCCTGTCCTATCTGATAGGCACCAAGGTTGCTCGGGTTTACAAAGCTAGAGGTCC	95	0
	ATTAAGTCTCTCCCTCCCTGTCCTATCTGATAGGCGCCAAGGTTGCTCGGGTTTACAAAGCTAGAGGTCC	0	93
GT1629	ATTAATTTTAAAGGGGTTTAAAATTAATTAGACCTTAGGCTATATCTTCTAATATGATTAGGGGGTAGTC	96	0
	ATTAATTTTAAAGGGGTTTAAAATTAATTAGACCTTAGGATATATCTTCTAATATGATTAGAGGGTAGTC	0	74
GT1630	ATTAATTTTAAAGGGGTTTGAAATTAATTAGACCTTAGGTTATATCTTCTAATATGATTAGCGGGTAGTA	96	0
	ATTAATTTTAAAGGGGTTTGAAATTAATTAGACCTTAGGTTATATCTTCTAATATGATTAGCGGGTAGTC	0	75
GT1631	ATTAATTTTTATATCTTAAACATTAAATAAAAACTATAAAATTTCACGTGCTGCCACACGTGTTTTTTAG	96	0
	ATTAATTTTTATATCTTAAACATTAAATAAAAACTATGAAATTTCACGTGCTGCCACACGTGTTTTTTAG	0	72
GT1632	ATTAAAAAAATAGTTGTTGCCCAGACGTGGCTAACCAACTATATATATTTCCTTCAAACCTATGATAATA	97	0
	ATTAAAAAAATAGTTGTTGCCCAGACGTGGCTAACCAACTATATATATTTCCTTCAAATCTATGATAATA	0	95
GT1635	ATTAATATCGTATCGTTAGAGGTTCTAATCTGTAGGCTCATTAGGTCCCCTTACTAACTCAGGTAAAACG	97	0
	ATTAATATCGTATCGTTAGAGGTTCTAATCTGTAGGCTCATTAGGTCCCCTTACTAACTCAGCTAAAACG	0	147
GT1636	ATTAATATTATTTTAGAATGAATTAAATAAATAGGTGATAACTACCTCTATTTATCGAATATATTGAAAA	97	0
	ATTAATATTTTTTAGAATGAATTAAATAAATAGGTGATAACTACCTCTATTTATCGAATATATTGAAAAT	0	71
GT1641	ATTAAATTAAATCAATGTAATCACTAGTTGGTGTGCGTAAATTTACATACTTGATTATTATATGAAACTT	98	0
	ATTAAATTAAATCAATGTAATCACTAGTTGGTGTGCGTAAATTTACATACTTGATTATTATATGAAACCT	0	102
GT1642	ATTAAATTTAGTCCTTTCAACTAAACTCTTTTAAGTTATTGACGATAATATAAAATGAGGGTGATGGATT	98	0
	ATTAAATTTAGTCCTTTCAACTAAACTCCTTTTAAGTTATTGACGATAATATAAAATGAGGGTGATGGAT	0	117
GT1643	ATTAACAAGCAAGGCCTTAATCTTTTAACAACCTCTAAGATAATTCTAAATCTCTAAGATAATTCTAAAT	98	0
	ATTAACAAGCAAAGGCCTTAATCTTTTAACAACCTCTAAGATAATTCTAAATCTCTAAGATAATTCTAAA	0	140
GT1644	ATTAAGCATAGTTATAATTATGCCAACATTAACTTCTGCTCATTCCCATGAAGTTGGAAGTTCAAACACT	98	0
	ATTAAGCATAGTTATAATTATGCCAACATTAACTTCTACTCATTCCCATGAAGTTGGAAGTTCAAACACT	0	80
GT1645	ATTAAGTACCTTGACTTTTCCTTTATCAAAATCATCAAATATGCAAAGTTTTAAATGTTGATGTCGATGA	98	0
	ATTAAGTACCTGACTTTTCCTTTATCAAAATCATCAAATATGCAAAGTTTTAAATGTTGATGTCGATGAA	0	104
GT1647	ATTAATGTTTGAGGTTCAAAATCCTATACTCCAATTTGTCGTAAAAAAAAACTAATGGTTTAAATCTTAT	98	0
	ATTAATGTTTGAGGTTCAAAATCCTATACTCCAATTTGTCGTAAAAAAAAAACTAATGGTTTAAATCTTA	0	72
GT1648	ATTAAAATCTCTTTTCAAAATTTTAGAACTTAATTATCTAAATCAAACGAAAATAAACTTGATTGGAAAT	99	0
	ATTAAAATCTCTTTTCAAAATTTTAGAACTTAATTATCTAAATCAAACGAAAATAAACTTGATTGAAAAT	0	78
GT1649	ATTAAATAAATTTGCGATTGATTTAACTATGCTTAAGTTGACTGTTAAAATTTTTTATTATTCTAATGAG	99	0
	ATTAAATAAATTTGCGATTGATTTAACTACGCTTAAGTTGACTGTTAAAATTTTTTATTATTCTAATGAG	0	109
GT1653	ATTAATGCAAGCATATAAATTTTTTGATTTATGATTTTTTTTTAAGTTCTAACAATCTGCAGGAGCGGAA	99	0
	ATTAATGCAAGCATATAAATTTTTTGATTTATGATTTTTTTTTTAAGTTCTAACAATCTGCAGGAGCGGA	0	81
GT1655	ATTAAAAATATTACAGGTTTTGAAACTTATTTTAAAAATATTGTACTTTTAAAAAACAGAAGGTTGGTCG	100	0
	ATTAAAAATATTATAGGTTTTGAAACTTATTTTAAAAATATTGTACTTTTAAAAAACAGAAGGTTGGTCG	0	66
GT1660	ATTAAATTAAAATTATGGTCCGACCATTAAACAGAAGTCTCTCTCAAGCCAGTGAGAGGGTGTGATCCTT	100	0
	ATTAAATTAAAATTATGGTCCGACCATTAAACAGAAGTCTCTCTCAAGCCAGTGAGAGGGTGTGATCCCT	0	104
GT1662	ATTAAATTTACTAAACTTCATATAGTATTTTACTTTGGCGGAATAAGGGAAATAATATGCGCACATTCGC	100	0
	ATTAAATTTACTAAACTTCATATAGTATTTTACTTCGGCGGAATAAGGGAAATAATATGCGCACATTCGC	0	92
GT1665	ATTAAAATCGTTTAAAATATGGTATGTTTGGAAACTTTTTTTAAAAGTATAGTAGTTTTAAAAAAGTGGA	101	0
	ATTAAAATCGTTTAAAATATGGAATGTTTGGAAACTTTTTTTAAAAGTACAGTAGTTTTAAAAAAGTGGA	0	88
GT1667	ATTAAGAAAAATAAAATTGTATTGTTTAAATACCCATAAATTCAATGATTGATCTTAAAAACGACCAAAT	101	0
	ATTAAGAAAAATAAAATTGTATTGTTTAAATACCCATAAATTCAATGATTGATCTTAAAAACGACCAAGT	0	109
GT1669	ATTAATAGTAAAAAAATCAAGGATCATTTAGAACTATTTCTCAAATTTCAAGGATCATTTTCAAACTCGA	101	0
	ATTAATAGTAAAAAAATCAAGGATCATTTAGAACTATTTCTCAAATTTCAAGGATAATTTTCAAACTCGA	0	89
GT1671	ATTAAAATTATTTTGAAGCTTTTTATCAAAAATAATAATAACAAAAATAATTTCGAAGCTTTACAGTTGA	102	0
	ATTAAAATTATTTCGAAGCTTTTTATCAAAAATAATAATAACAACAATAATTTCGAAGCTTTACAGTTGA	0	126
GT1674	ATTAAATAATGGAAATTAAGGGGGTTTATTGGAAAATATTAAGAAATTAACGGAAGAAAGATAAAATTCA	102	0
	ATTAAATAATGGAAATTAAGGGGGTTTATTGGAAAATATTAAGAAATTAATGGAAGAAAGATAAAATTCA	0	85
GT1676	ATTAATATTTTGATAATAACAAACTTAATTTTATTTATTGACAATTTTAATATTTTGAAGTGTTCACAGC	102	0
	ATTAATGTTTTGATAATAACAAACTTAATTTTATTTATTGACAATTTTAATATTTTGAAGTATTCACAGC	0	104
GT1678	ATTAATCTTTGTGGAAACGGGGGAGCAGGGGTAAAAGAAGGTTGTACCTGTGGAGGAACACTCGGGGTGT	103	0
	ATTAATCTTTGTGGAAACGGGGGAGTAGGGGTAAAAGAAGGTTGTACCTGTGGAGGAACACTCGGGGTGT	0	109
GT1679	ATTAATTTGACATTAAGGGCAAAAAAGCCAACAAGTATCATCGGTATGTCTTGTGTACCTAAAGAAGCAA	103	0
	ATTAATTTGACATTAAGGGCAAAAAAGCCAACAAGTATCATCGGTATGTCTTGTGTGCCTAAAGAAGCAA	0	87
GT1680	ATTAAAAAAACGTTTCTTCAGGGAAAGATAATAAAAATCAAATCTCGACCTCCCGAAATATTGATCTTTA	104	0
	ATTAAAAAAACGTTTGTTCAGGGAAAGATAATAAAAATCAAATCTCGACCTCCCGAAATATTGATCTTTA	0	149
GT1684	ATTAACCTTGACCTATTTGGACCAATGAGACACCCATAATGTTACACAACGTTATTTTGATCCCTCAAAA	104	0
	ATTAACCTTAACCTATTTGGACCAATGAGACACCCATAATGTTACACAACGTTATTTTGATCCCTCAAAA	0	125
GT1685	ATTAATAAATAGTCCACCCGCAAAAACAAACACAATTCGGCGATAATTAAAATTGTGAGTCAATCACGCG	104	0
	ATTAATAAATAGTCCACCAGCAAAAACAAACACAGTTCGGCGATAATTAAAATTGTGAGTCAATCACGCG	0	86
GT1686	ATTAATCAATCTAACTATTAATTCTATAGGTCAATAACCCTCAAATCTCGAATGCCTCGAGCGCAAGTTA	104	0
	ATTAATCAATCTAACTATTAATTCTATAGGTCAATAACCCTCAAATCTCGAATGACTCGAGCGCAAGTTA	0	50
GT1689	ATTAAAGTTTATCATCGAGTGTAAAGAACAGTCTTATTTCCTTCTTTGAGTTGAGTTAAATGGATGGTTT	105	0
	ATTAAAGTTTATCATCGAGTGTAAATAACAGTCTTATTTCCTTCTTTGAGTTGAGTTAAATGGATGGTTT	0	92
GT1692	ATTAACCAAACCAGATTGCAACCTTCCTGGTTTCATCATTGAGGATATTGGCCATTCTCTGTTTTATTTA	105	0
	ATTAACCAAACCAGATTGCAACCTTCCTGGTTTCATCATTGAGGATATTGACCATTCTCTGTTTTATTTA	0	123
GT1693	ATTAAGTTATTAATGACATTAATGTGGTCGAGACTACATCATAAGAAAGAGTGATAAATGTAGAAAGGGA	105	0
	ATTAAGTTATTAATGACATTAATGTGGTCGAGACTATATCATAAGAAAGAGTGATAAATGTAGAAAGGGA	0	67
GT1696	ATTAATATTTTATACGGCATACTATCTTCTATAAATTATCAACTCAATAATCAACCGTCTAAACTTATAT	105	0
	ATTAATATTTTATACGGCATACTATCTTCTATAAATTATCAACTTAATAATCAACCGTCTAAACTTATAT	0	52
GT1698	ATTAATTGAAGAATTGAGTTGAAAATATTTTTTTGTTTTAATTTGATGAAATAGGCATATCACTCACACA	105	0
	ATTAATTGAAGAATTGAGTTGAAAATATTTTTTGTTTTAATTTGATGAAATAGGCATATCACTCACACAA	0	104
GT1700	ATTAAAATAGTAAAAAAAGAATATACATTAAATAATTACATCGTGTGTGGCTCCTATATTACTAAAAAAT	106	0
	ATTAAAATAGTAAAAAAAAATATACATTAAATAATTACATCGTGTGTGGCTCCTATATTACTAAAAAATT	0	65
GT1702	ATTAACATCGATATGTCAAGTTCCACATAGCCATAACATTGATATGTCAAGTTCCACATAGCCATAACAA	106	0
	ATTAACATCGATATGTCAAGTTCCACATAGCCATAACATTGATATGTCAAGTTCCACATAGCCATAACAT	0	80
GT1703	ATTAAGGCTATTTTGGGAAAAAAATCATATTTTAATGTTGAAATCTCCCTGTGTAAATATTAATAAATAT	106	0
	ATTAAGGCTATTTTGGGAAAAAAAATCATATTTTAATGTTGAAATCTCCCTGTGTAAATATTAATAAATA	0	58
GT1705	ATTAATAAATAAGTTTTCCAATCAAATGGTTACTTTTAATAATTCCCAGCAAGTTTTCTAAGGTAAAAAA	106	0
	ATTAATAAATAAGTTTTCCAAACAAATGGTTACTTTTAATAATTCCCAGCAAGTTTTCTAAGGTAAAAAA	0	91
GT1707	ATTAATATATGTGCTTTTGAGTCATAATTAGATAATTAAAACATTAATGTTTTTAAAAAAAAAAATTTAA	106	0
	ATTAATATATGTGCTTTTGAGTCATAATTAGATAATTAAAACATTAATGTTTCTAAAAAAAAAAATTTAA	0	53
GT1708	ATTAATTGTTAGTGGGGGAACTTTAAGTTGGTGACAGTTGGAAGTACTTATTGTCCCTAATGATTAGTTA	106	0
	ATTAATTGTTAGTGGGGGAACTTTAAGTTGGTGACAATTGGAAGTACTTATTGTCCCTAATGATTAGTTA	0	114
GT1710	ATTAAAAAATTAAAGTTTCGCTTGAACTTCTTTTTTAAATCCATAATTATTACATCATTTAAATTTTTTA	107	0
	ATTAAAAAATTAAAGTTTCGCTTGAACTTCTTTTTTAAGTCCATAATTATTACATCATTTAAATTTTTTA	0	75
GT1719	ATTAAAAACACAAATACATACCATCTTCATTCAAATAAGTAAAATTAACTTTTAAATAGTGAAATTATGA	108	0
	ATTAAAAACACAAATACATACTATCTTCATTCAAATAAGTAAAATTAACTTTTAAATAGTGAAATTATGA	0	63
GT1722	ATTAAATAAAGATTTTATTTTAACAAAACCTTTGGTTTTTAACTGTTCTTCCTCTTTGATTTTTTCCTCA	108	0
	ATTAAATAAAGATTTTATTTTAACAAAACCTTTGATTTTTAACTGTTCTTCCTCTTTGATTTTTTCCTCA	0	102
GT1723	ATTAAATGACATCACAACCGGCTTGAAAAATCTTCAATCACGTACACTATCTTTTTATAGTTCTTCTATA	108	0
	ATTAAATGACAGCACAACCGGCTTGAAAAATCTTCAATCACGTACACTATCTTTTTATAGTTCTTCTATA	0	83
GT1724	ATTAATTAGGCTAATTTGACATTTACATTGTACCACTAAAAAGAGTTTGATAAAATTATATATTTAGCAA	108	0
	ATTAATTAGGCTAATTTGACATTTACATTGTACCACTAAAAAGAGTTTGATAAAATTATATATTTAGCGA	0	97
GT1726	ATTAATTGGATTCATTTTTGCTGGGAGAGGTGGTGAGGTGGAGAGTGAGAGGTTACTCCCTCTTCCCTCA	108	0
	ATTAATTGGATTCATTTTTGCTGTGAGAGGTGGTGAGGTGGAGAGTGAGAGGTTACTCCCTCTTCCCTCA	0	77
GT1728	ATTAAAAAGTTATGGATCTCATTAATATAAGAGAGATAAATGATAAAAGTTCTAAAAATAATTGTAATAA	109	0
	ATTAAAAAGTTATGGATCTCATTGATATAAGAGAGATAAATGATAAAAGTTCTAAAAATAATTGTAATAA	0	120
GT1730	ATTAAGGGAGTCTGACACAACCTCAACTGAAATGAAATGCATATATTTATTTTAAAATTAATTTTAGAAA	109	0
	ATTAAGGGAGTCTGACACCACCTCAACTGAAATGAAATGCATATATTTATTTTAAAATTAATTTTAGAAA	0	103
GT1731	ATTAAAAAACCAAAAAAATATTTCAATTTTAGATTAATATTTTTTTAGTTAATCATTCTTTAGTCTCGTT	110	0
	ATTAAAAAACCAAAAAAATATTTCAATTTTAGATTAATATTTTTTTAGTTAATCATTCTTTAGTCCCGTT	0	92
GT1733	ATTAAAGTGGAAAGATTTGGTTAAAGTAAATCATCATAGATTGGTTCATTCGTCCAAAAGGATAAAGTAA	110	0
	ATTAAAGTGGAAAGATTTGGTTAAAGTAAATCATCATAGATTGGTTCATTCGTACAAAGGGATAAAGTAA	0	140
GT1734	ATTAAATAAATAAAAAAAGGGAAAACTCCTCTGCAAAATTGCAGGGGAGTGGGAAGTTTTTTTGACGTGG	110	0
	ATTAAATAAATAAAAAAAAGGGAAAACTCCTCTGCAAAATTGCAGGGGAGTGGGAAGTTTTTTTGACGTG	0	75
GT1735	ATTAAATATTGTTACTTTTAAATTTGGCAAGTTGTATCAATTTTCCCATAAACTTTCCATTTTGTTAAAT	110	0
	ATTAAATATTGTTACTTTTAAATTTGTCAAGTTGTATCAATTTTCCCATAAACTTTCCATTTTGTTAAAT	0	137
GT1736	ATTAAAAAGTAAAGTAACATTTTAGATAAATACGAACTCTCTATTTATATATTTATTAAATATCAAGATT	111	0
	ATTAAAAAGTAAAGTAACATTTTAGATAAATACGAACTCTCTATTTATATATTTATTAAATATCAAGATA	0	70
GT1737	ATTAAAGAAGATTAGATTGAAACTTTTAAATAAGAGACAATAGTATGCAAGAAAAATAAAAAATGAAGAA	111	0
	ATTAAAGAAGATTAGATTGAAACTTTTAAATAAGAGACAATAGTATACAAGAAAAATAAAAAATGAAGAA	0	87
GT1738	ATTAATATTTCACTAATCGAACTAGGTTTTTTTTTTTAAAAAAACAGTGAATTATGTTTAAATTATATTA	111	0
	ATTAATATTTCACTAATCGAACTAGGTTTTTTTTTTTTAAAAAACAGTGAATTATGTTTAAATTATATTA	0	68
GT1741	ATTAAATACTAAAAACTGAAATATGAGCAACCATTGGAAGAGGAGATAGATAAATATTGACTTCTCCTCA	112	0
	ATTAAATACTAAAAGCTGAAATATGAGCAACCATTGGAAGAGGAGATAGATAAATATTGACTTCTCCTCA	0	133
GT1743	ATTAATATAGATCGTGTGATGTTTTACATATACAGTCTCCATTAAATTTATATTCTAATGGACGCACCAC	112	0
	ATTAATATAAATCGTGTGATGTTTTACATATACAGTCTCCATTAAATTTATATTCTAATGGACGCACCAC	0	138
GT1745	ATTAATTTAGTTGAAGGAGAACCAACAATCATACTTTTAATAATCCATAAATTCTTGAAAATGAAAGGTA	112	0
	ATTAATTTAGTTGAAGGAGAACCAACAATCATACTTTTAATAATCCATAAAATTCTTGAAAATGAAAGGT	0	124
GT1746	ATTAATTTTAATAAGTTACATTTCCATCATTAAAAAAATATCCCACTGGAAGTTTCTAAAAGTAAGAAAT	112	0
	ATTAATTTTAATAAGTTACATTTCCATCATTAAAAAAAATATCCCACTGGAAGTTTCTAAAAGTAAGAAA	0	55
GT1750	ATTAACAAATTGAGACATTAACAGATGTTGGAAGATTTAAATTAAAATACTTGAAAGCTTAGAGATGAAA	113	0
	ATTAACAAATTGAGACATTAACGGATGTTGGAAGATTTAAATTAAAATACTTGAAACCTTAGAGATGAAA	0	85
GT1753	ATTAAATATTCAAATGGATCCTATAAAATCGAAATATATGAGATAAAATTAATAGAACAATAATTTTAAG	114	0
	ATTAAATATTCAAATGGATCCTATGAAATCGAAATATATGAGATAAAATTAATAGAACAATAATTTTAAG	0	69
GT1755	ATTAATACCACTAGATATACTTTGAAGCAACATACACAAATAAAGAAGCATACCTCTCAATCGGATACAT	114	0
	ATTAATACCACTAGATAAACTTTGAAGCAACATACACAAATAAAGAAGCATACCTCTCAATCGGATACAT	0	93
GT1757	ATTAAATAAAATAACTTGGAATAGGAATATCAATATCCATATTGAAAGAGAAAAAAAAAAGAAAAAATTT	115	0
	ATTAAATAAAATAACTTGGAATAGGAATATCAATATCCATATTGAAAGAGAAAAAAAAAAAGAAAAAATT	0	88
GT1760	ATTAAAATGCCATACAAAAATTTGGCATTAAAATATATAAACTAAATACATATCAATACGTTCATATTAT	116	0
	ATTAAAACGCCATACAAAAATTTGGCATTAAAATATATAAACTAAATACATATCAATACGTTCATATTAT	0	106
GT1761	ATTAAATAAATAAAACAGTTTTTTTTTAATGTATCTTGGAAAGGTTATTCCATAAGATATTTTAAATTTT	116	0
	ATTAAATAAATAAAACAGTTTTTTTTAATGTATCTTGGAAAGGTTATTCCATAAGATATTTTAAATTTTA	0	83
GT1763	ATTAAATTGCATTGTAACTTAAACTTGAGTTCTATTGGAAAGCTTTAGCTTTCCCTCCCGTTTCACTGAC	116	0
	ATTAAATTGCATTGTAACTTAAACTTGAGTTCTATTGGAAAGCTTTAGCTTTCCCTCCCGTTTCACTGGC	0	130
GT1764	ATTAACTAATAAAAAAAATTTTGGTTGAAGAAATACAATCCGAGCAATTGGATTCAGTCTATATCAACCC	116	0
	ATTAACTAATAAAAAAAAATTTGGTTGAAGAAATACAATCCGAGCAATTGGATTCAGTCTATATCAACCC	0	71
GT1765	ATTAATCTTCCTTTAATTAGTATTTCTTAATCATATTACAAATATTAATTTCTTCTTTTCTTACCCAAAA	116	0
	ATTAATCTTCCTTTAATTAGTATTTCATAATCATATTACAAATATTAATTTCTTCTTTTCTTACCCAAAA	0	56
GT1767	ATTAAAGCCGAGGGTCCATAGCTCAGTGGTAGAGCATTTGACTGCAAATCAAGAGGTCATCGGTCCGAGC	117	0
	ATTAAAGCCGAGGGTCCATAGCTCAGTGGTAGAGCATTTGACTGCAAATCAAGAGGTCATCGGTTCGAGC	0	173
GT1768	ATTAAAGTCGAGAAAAATTTTTACCTCTTTCTTCCCTAATAGGGTGTAAAAATGATTTAGCAACGATTGC	117	0
	ATTAAAGTCGAGAAAATTTTTTACCTCTTTCTTCCCTAATAGGGTGTAAAAATGATTTAGCAACGATTGC	0	109
GT1769	ATTAACTCTGCAGAGTGAGAATGCAATTGACAATGTATAGGACATATACTCTATTTTGTCTTGGCTTAAA	117	0
	ATTAACTCTGCAGAGTGAGAATGCAATTGACAATGTATAGGACATATACTCTATTTTGCCTTGGCTTAAA	0	173
GT1771	ATTAATTGTTAAGCGTGAGTGAAATTAGGCGTCTTGATGTACTTAAAGTTCAACAATTGTAGAAGTGGGA	117	0
	ATTAATTGTTAAGCGTGAGTGAAATTAGGCGTCTTGATGTACTTAAAAGTTCAACAATTGTAGAAGTGGG	0	140
GT1773	ATTAAAAACTTGGTAAGGACACAATTTTTTTTCCAAACAAAATAAGAAAAGCTTGTAATTATTATCAATA	118	0
	ATTAAAAACTTGGTAAGGACACAATTTTTTTTCCAAACAAAATAAGAAAAAGCTTGTAATTATTATCAAT	0	61
GT1778	ATTAAACCAATCTTTTTCTGTTTTCAAAATAGCAAAAGGGACAAAATATAGAGTTAAAAAGGCATACATT	118	0
	ATTAAACCAATCTTTTTCTGTTTTCAAAATAGCAAAAGGGACAAAAGATAGAGTTAAAAAGGCATACATT	0	123
GT1779	ATTAAATACTTTTCTTCAGTCTGGAGCGTAGAAATTGAACCGTCGACCTCGAAAAGAAGCATATGTCATT	118	0
	ATTAAATACTTTTCTTAAGTGTGGAGCGTAGAAATTGAACCGTCGACCTCGAAAAGAAGCATATGTCATT	0	117
GT1782	ATTAAATTTAAAAGGAAGCGTAATTACAGTACTACCCCTTAGTTCAAAAATCAAACTATTTGCTCTCCTT	118	0
	ATTAAATTTAAAAGGAAGCGTAATTACAGTACTACCCCTTAGTTCAAAAATCAAACTATTTGTTCTCCTT	0	181
GT1785	ATTAAGAAAATGAAAGATTCAGACGACATAAAACTGTTGCAATTAGCGAATACGCCAGCAACCCCATTTT	118	0
	ATTAAGAAAATGAAAGATTCACACGACATAAAACTGTTGCAATTAGCGAATACGCCAGCAACCCCATTTT	0	126
GT1786	ATTAAGGATATCTAATATTATGTCCACTCATTTTTCCTATTCAGGAAATTAAAGTCGAGATCGGAAGATT	118	0
	ATTAAGGATATCTAATATTGTGTCCACTCATTTTTCCTATTCAGGAAATTAAAGTCGAGATCGGAAGATT	0	166
GT1787	ATTAATAATCCTGAACTTAGATAATTGTCCTAGTTTTTATTACTTTATTCAATAAAAAAACCACAAAAAC	118	0
	ATTAATAATCCTGAACTTAGATAATTGTCCTAGTTTTTATTACTTTATTCCATAAAAAAACCACAAAAAC	0	53
GT1788	ATTAATGATTAATAAGGTTTTAAAAAATGTCATATTTGCAATTATTTTATTAACTATGTTATATTTGCAA	118	0
	ATTAATGATTAATAAGGTTTTAAAAAATGTCGTATTTGCAATTATTTTATTAACTATGTTATATTTGCAA	0	75
GT1791	ATTAATAAGTATCAAATTAGTTGGTAGCTTCATTCCAAAAATAAAAAAATTAAAATAGTTGGTACTAATT	119	0
	ATTAATAAGTATTAAATTAGTTGGTAGCTTCATTCCAAAAATAAAAAAATTAAAATAGTTGGTACTAATT	0	78
GT1794	ATTAATTTATATGAATTCTAACAAAGCTTAAGCTGATGAGTTGGATAAATTTAATTCATTTATATAGATT	119	0
	ATTAATTTATATGAATTCTAACAAAGCTTAAGCTGATGAGTTGGATAAATTTAATTCATTTATATGGATT	0	139
GT1795	ATTAATTTGAAGTATCAAATGGTTTAACAAATCAAAATAGACTAAAGCGAGCGTAGTTCAACCGTAATTG	119	0
	ATTAATTTGAAGTATCAAATGGTTTAACAAATCAAAATAGACCAAAGCGAGCGTAGTTCAACCGTAATTG	0	112
GT1804	ATTAAAATCAAACTTTTTTAAATAATAATAATAGCAAAATAAAATAAAATAAGCCGGATCAAATACGGTG	121	0
	ATTAAAATCAAACTTTTTTAAATAATAATAATAACAAAAAAAAATAAAATAAGCCGGATCAAATACGGTG	0	74
GT1805	ATTAACTTAGTAATTATTAGTAAATTAACTATCTAAAGAAAAAGAAAGAAAGAAAAAAAGATTATAAAAT	121	0
	ATTAACTTAGTAATGATTAGTAAATTAACTATCTAAAGAAAAAGAAAGAAAGAAAAAAAGATTATAAAAT	0	91
GT1806	ATTAAGAGTATTATGTCACTACTCCTTTTGTAATCAAGATATCAATATGACCTTAACATCAACATATCAC	121	0
	ATTAAGAGTATTATGTCACTACTCCTCTTGTAATCAAGATATCAATATGACCTTAACATCAACATATCAC	0	108
GT1807	ATTAATTACTCTTTTATTACGAAACAACATTTGAATTAAATTTCTGACCTACCCAATCTCGACGAAAAAA	121	0
	ATTAATTACTCTTTTATTACGAAACAACGTTTGAATTAAATTTCTGACCTACCCAATCTCGACGAAAAAA	0	135
GT1808	ATTAATTATCATAAAAGAGAAAAAGACTTGAAAATGTTAGTGGGAATTAATATCATCTTTGAAAATGCGA	121	0
	ATTAATTATCATAAAAGAGAAAAAGACTTGAAAATGTTAGTGGGAATTAATATCATCTTTAAAAATGCGA	0	148
GT1811	ATTAAAAAATAATCAGACAAATGCTTGTAACTAGTCATAAATTGTAAAAATTAGAAGAAAAAAGTTATTA	123	0
	ATTAAAAAATAATCAGACAAATGCTTGTAACTAGTCATAAATTGTAAAAATTAGAGAAAAAAGTTATTAA	0	138
GT1814	ATTAAAAAATTGTTTGTGCACAAAATGTCCTTCATAAACGATCAGGCGAATCTTCTATGAAGTGTAGAGA	124	0
	ATTAAAAAATTTTTTGTGCACAAAATGTCCTTCATAAACGATCAGGCGAATCTTCTATGAAGTGTAGAGA	0	124
GT1815	ATTAACATAGATTAAGGACCAAAAAACCAACAATTACAAATATTTCACAAATAAACCAAAGATCAATTTC	124	0
	ATTAACATAGATTAAGGGCCAAAAAACCAACAATTACAAATATTTCACAAATAAACCAAAGATCAATTTC	0	136
GT1816	ATTAAGAGGAAATGGGTTTAAACCTCAATCATTTAGCTATGTTTAAATATGCTACATTTAACAAATATTT	124	0
	ATTAAGAGGAAATAGGTTTAAACCTCAATCATTTAGCTATGTTTAAATATGCTACATTTAACAAATATTT	0	93
GT1819	ATTAAAATCAATAGTTCGATATTTCATTATATTGTTGGTGAACTATAAAAAAAAATAAAAATTGAACTAT	125	0
	ATTAAAATCAATAGTTCGATATTTCATTATATTGTTGGTGAACTATAAAAAAAAAATAAAAATTGAACTA	0	155
GT1820	ATTAAAGCATAATAAAAGTTATAATAATTCCATCAAAAAGAGTTGTGGTTACTTTTTGAATACTCTAAAA	125	0
	ATTAAAGCATAATAAAAGTTATAATAATTCCACCAAAAAGAGTTGTGGTTACTTTTTGAATACTCTAAAA	0	96
GT1821	ATTAAAGTTTAAATCTCAACTAGTCTGCTCTCCCAACTTTGAAGTATATTTTATTTTAGTTTCTAAATTT	125	0
	ATTAAAGTTTAAATCTCAACTAGTCTGCTCTCCCAACTTTGAAGTATATTTTATTTTGGTTTCTAAATTT	0	127
GT1822	ATTAATAATTTACTCCCTATTGATGCAGATATACAATAGAACAACGAGACAATAAGTGAGAAAGAACAGA	125	0
	ATTAATAATTTACTCCCTATTGATGCAGATATACAACAGAACAACGAGACAATAAGTGAGAAAGAACAGA	0	142
GT1823	ATTAATGCTTTATTTGTTGATAAGAAAGAGAGAAAAAAAATTAAAAAAAAAAATAGAGAGATGAGAGTTT	125	0
	ATTAATGCTTTATTTGTTGATAAGAAAGAGAGAAAAAAAATTAAAAAAAAAATAGAGAGATGAGAGTTTT	0	82
GT1824	ATTAATTTTGATTTTTTTTGTAACTTTATTTTAAAATAAAAACAAAAACTTAAAAAGTAGATACGTAGCC	125	0
	ATTAATTTTGATTTTTTTGTAACTTTATTTTAAAATAAAAACAAAAACTTAAAAAGTAGATACGTAGCCC	0	97
GT1825	ATTAATTTTTCCTTCGACAAAACTCTCACAACTGTTATTGAGTTTGTGGAGTCTAAAACATAAACCCATA	125	0
	ATTAATTTTTCCTTCGACAAAACTCTCACAACTGTTATTGAGTTTGTGGAGTCTAAAATATAAACCCATA	0	85
GT1827	ATTAAAACTTTACTTGAGAAACAACAATTAAAAAAACATTACTTTCTCTAACTAAATGAACTAAAATTAA	126	0
	ATTAAAACTTTACTTGAGAAACAACAATTAAAAAACATTACTTTCTCTAACTAAATGAACTAAAATTAAA	0	73
GT1828	ATTAAATGAATAATTGGAGTCAAAGACAAAGAAAAAAATATACACAACCCAAGTAGATAAATCATTGAAA	126	0
	ATTAAATGAATAATTGGAGTCAAAGACAAAGAAAAAAAATATACACAACCCAAGTAGATAAATCATTGAA	0	96
GT1831	ATTAAGACGTTAAACATCATTTTCAATACGATAAATAATTCAATTGATTAAATCATTATAACTTCGATTA	126	0
	ATTAAGACGTTAAACATTCATTTTCAATACGATAAATAATTCAATTGATTAAATCATTATAACTTCGATT	0	85
GT1834	ATTAAAAACCCCACGTTTTCCCTGACCTGAGAATTTCACACGTAACTATCAAATTTATATTTTAACGAAA	127	0
	ATTAAAACCCCCACGTTTTCCCTGACCTGAGAATTTCACACGTAACTATCAAATTTATATTTTAACGAAA	0	106
GT1835	ATTAACAATTTTTAGATGATATGACAATATTTATTATTTTTAGTTTACGTATGTCAGTGTTGAGACATTT	127	0
	ATTAACAATTTTTAGATGATATGACAATATTTATTATTTTTAGTTTACGTATGTCAGTCTTGAGACATTT	0	97
GT1836	ATTAACCTTGTTCTATCATTGACAAAAATTGCTGACTGGAAGTACTTTCTTAATTTTTCACGTGTTCTTT	127	0
	ATTAACCTTGTTCTATCATTGACAAAAATTGCTGACTAGAAGTACTTTCTTAATTTTTCACGTGTTCTTT	0	163
GT1837	ATTAAGAATATATTGAACTCTGTGTGGGTTTCAAAATTGAAAAGTGGTTGGTACTTTTCTAAGTTCTATT	127	0
	ATTAAGAATATATTGAACTCTGTGTGGGTTTCAAAATTGAAAAGTGGTTGCTACTTTTCTAAGTTCTATT	0	162
GT1838	ATTAATAAGAGGTCAAGTAGATGTAGAATTAACGCGGTTATTATTTTGAATTTGTAATATTATTTTTTAG	127	0
	ATTAATAAGAGGTCAAGTAGATGTAGAATTAACGCGGTTATTATTTTGAGTTTGTAATATTATTTTTTAG	0	107
GT1839	ATTAATACTATGGATTTCCAACCCCAATTGGTGTCTAGATTATATTAAAAATAATTCAAGTAACTTGTGT	127	0
	ATTAATACTATGGATTTCCAACCCCAATTGGTGCCTAGATTATATTAAAAATAATTCAAGTAACTTGTGT	0	132
GT1840	ATTAATCTTGTAATAAAATCTAAATTTTGGTGGAAAAAATCTCACCGATAACAACTTCAATACGATTGGA	127	0
	ATTAATCTTGTAATAAAATCTAAATTTTGGTGGAAAAAATCTCACCGATAACAACTTTAATACGATTGGA	0	141
GT1841	ATTAATGAGTTTAATTTATGTAACACCAACGAATATTTTTTTAAATATTATTGTTTTTAAAATATGTATT	127	0
	ATTAATGAGTTTAGTTTATGTAACACCAACGAATATTTTTTTAAATATTATTGTTTTTAAAATATGTATT	0	87
GT1842	ATTAAACAATAATTTCAACGCAATTTATGATGATACGTCATTTGCATATTTTAATTGTTCATCTATGAGT	128	0
	ATTAAACAATAATTTCAACGCAATTTATGATGATACGTCATTTGCATATCTTAATTGTTCATCTATGAGT	0	106
GT1843	ATTAAATGACAATGGTATGATATTGTCTATTTTATGTATAACTCTTACGACTTTACTTTTTGTTCACCAA	128	0
	ATTAAATGACAATGGTATGATATTGTCTATTTTATGTATAACTCTTACAACTTTACTTTTTGTTCACCAA	0	153
GT1845	ATTAATACAAAATATTGATTTAAACATATTTTCTGTTCATTTATTTATGGTACCTTTTACGATTACTAAT	128	0
	ATTAATACAAAATATTGATTTAAACATATTTTCTGTTCATTTATTTATGGCACCTTTTACGATTCCTAAT	0	56
GT1847	ATTAATGACTAAAATAGCTCCTCAACTTGGATGGGAGGTTCGAATTTTCGTGATATTCTTTTTAATTTTT	128	0
	ATTAATGACTAAAATAGCTCCTCAACTTGGATGGGAGGTTCGAATTTCGTGATATTCTTTTTAATTTTTT	0	114
GT1849	ATTAACAATCAATTTAATATTAAATAAAAAAAATCTCCTGATTCGAGACTAACTAACCTGAGGGACCCGG	129	0
	ATTAACAATCAATTTAATATTAAATGAAAAAAATCTCCTGATTCGAGACTAACTAACCTGAGGGACCCGG	0	99
GT1851	ATTAATCATCAATTGCATATATCATCCACAAAAAGTTAAAGTTTTCTCCCAAGTTTATACTTTAAATATC	129	0
	ATTAATCATCAATTGCATATATCATCCACAAAAGTTAAAGTTTTCTCCCAAGTTTATACTTTAAATATCT	0	269
GT1855	ATTAAAAAAGAAAAAAAGGAAGTTAATTAGTGCAGAATTCTATGCTAATTGATAATAATTTAAGACGTCT	130	0
	ATTAAAAAAGAAAAAAAGGAAGTTAATTAGTGCAAAATTCTATGCTAATTGATAATAATTTAAGACGTCT	0	83
GT1857	ATTAAATGATTCTGATATTAATTTATGGAATTAAATATTTTATATTTCAAAAAAGCAAAAAACTATAATA	130	0
	ATTAAATGATTGTGATATTAATTTATGGAATTAAATATTTTATATTTCAAAAAAGCAAAAAACTATAATA	0	68
GT1858	ATTAACAAAACAAAGCGCAAATATTTTATGAGCGTTCATCGAAACTGTGTATTTAACGTACGGGTCCCGA	130	0
	ATTAACAAAACAAAGCGCAAATATTTTATGAGTCGTTCATCGAAACTGTGTATTTAACGTACGGGTCCCG	0	124
GT1862	ATTAAAGTTTCAAATAGTGAAAATATAAAAAGGGTTGTTTTCAAAATTTTCACTTAATTCAATAAATTTC	131	0
	ATTAAAGTTTCAAATAGTGAAAATATAAAAAGGATTGTTTTCAAAATTTTCACTTAATTCAATAAATTTC	0	86
GT1863	ATTAAATGCTCTTGAGTTGTGAGTAAGGCTGCTAAGTAACCTGAAAACTTTCTACTTAAGGCACTGCAAC	131	0
	ATTAAATGCTCTTGAGTTGTGAGTAAGGCTGTTAAGTAACCTGAAAACTTTCTACTTAAGGCACTGCAAC	0	116
GT1864	ATTAAGAAAGCTGCAGTGATTGATGAAACTCCTTTTTAATGACGGCCACACATTAGTCCTACCAAACACA	131	0
	ATTAAGAAAGCTGCAGTGTTTGATGAAACTCCTTTTTAATGACGGCCACACATTAGTCCTACCAAACACA	0	181
GT1865	ATTAATATAAGTTTTGTATTAATTAGATGAAAATAAAGTTGCATTGAGTATAACATTACTTTAGTAAATA	131	0
	ATTAATATAAGTTTTGTATTAATTAGATGAAAATAAAGTTGCATTGAGTATGACATTACTTTAGTAAATA	0	101
GT1866	ATTAATTTTATTATTATTGTTTTTTAAATGAAGATTCCAACCCATTGAATCACCGCAACTCTAAAATATA	131	0
	ATTAATTTTATTATTATTGTTTTTTAAATGAAGATTCCAACCCATTAATCACCGCAACTCTAAAATATAT	0	78
GT1868	ATTAAATCATACATACATAATAACAATTAAATAGCAAAATTGGACCGAATTTTGGTATCCTAAGAAAGCA	132	0
	ATTAAATCATACATACATAATAACAATTAAATAGCAAAATTGGACCGAATTTTGGCATCCTAAGAAAGCA	0	92
GT1870	ATTAAGAGGAGAGATTCTCTTTTTGTCAATAATATATATATCAGTTAAACCATATTTAGATTAAGAAATA	132	0
	ATTAAGAGGAGAGATTCTCTTTTTGTCAATAATATATATATCAGTTAAACTATATTTAGATTAAGAAATA	0	75
GT1872	ATTAATTCAACTATATGTTAATACTAACATAAATTTATCAGATTTTACTATGACCTATATTGGTATTCAC	132	0
	ATTAATTCAACTATATGTCAATACTAACATAAATTTATCAGATTTTACTATGACCTATATTGGTATTCAC	0	167
GT1876	ATTAAAAAAATTTTTAATCTCTAAATGATTGGTTAATAACTTTGAATTTGAATTTTACCAATTGATTTAT	134	0
	ATTAAAAAAATTTTTAATCTCTAAATGATTTGTTAATAACTTTGAATTTGAATTTTACCAATTGATTTAT	0	60
GT1877	ATTAAAAAGGAATGAGTTCAAATCTTATGGTGGCCACCAACCTTAGAAATTAATAACGACACCAAATATT	134	0
	ATTAAAAGGGAATGAGTTCAAATCTTATGGTGGCCACCAACCTTAGAAATTAATAACGACACCAAATATT	0	131
GT1878	ATTAAACTCTTTTTCAATTTTTGCTGCGGGTGAATGTTTGAAATTTTGGAATCGGCTTCGATTTAGATGA	134	0
	ATTAAACTCTTTTTCAATTTTTGTTGCGGGTGAATGTTTGAAATTTTGGAATCGGCTTCGATTTAGATGA	0	125
GT1879	ATTAAATAATATATTTTCAACTTTCATTTACAATATGTATGGTCTATTCGAAAGGGGTTATTTTCCTTCT	134	0
	ATTAAATAATATATTTTCAACTTTCATTTACAATATGTATGGTCTATTCGAAAGGGGTTATTTTCATTCT	0	125
GT1882	ATTAATAAGAAATATGTAGCCTTCTTATATAGAACAGAAGCTCAAACATAAAAGGAAATAAAGATAAAAT	134	0
	ATTAATAAGAAATATGTAGCCTTCTTATATAGAAGAGAAGCTCAAACATAAAAGGAAATAAAGATAAAAT	0	118
GT1883	ATTAATAGTTGTAACTAAACCTATTTAATAAACAAATAAACATCACTTCAGTGGAAATTTATTAACTCAA	134	0
	ATTAATAGTTGTAACTAAACCTATTTAATAAACAAATAAACATCACTTTAGTGGAAATTTATTAACTCAA	0	86
GT1884	ATTAATTTGAGATTAAGGCCAAAAAGCCAATATTTATAACTATCGAAAAAAGATTAAAAACATCTACAAT	134	0
	ATTAATTTGAGATTAAGGCCAAAAAGCCAACATTTATAACTATCGAAAAAAGATTAAAAACATCTACAAT	0	103
GT1885	ATTAAAGCGTATCTATTCAGTGATTGGAACTAGGGTAAGGTCTACATCTTCAAAAAAATTTAAGAAAACT	135	0
	ATTAAAGCGGATCTATTCAGTGATTGGAACTAGGGTAAGGTCTACATCTTCAAAAAAATTTAAGAAAACT	0	77
GT1886	ATTAAATATATGTTGCATAAGAGTATGTCATATAATTTAAAATCCCACCGTAGGTTAAGCATTATTATGC	135	0
	ATTAAATATATGTTGCATAAGAGTATGTCATATAATTTAAAATCCCACCGTAGGTTAAGCATTATTATGT	0	166
GT1888	ATTAAGTCCTATAATGATTCCCAAAAGTTCTAAAAAATATACAAAAATGCTAGATCAAAATATTCAAATG	135	0
	ATTAAGTCATATAATGATTCCCAAAAGTTCTAAAAAATATACAAAAATGCTAGATCAAAATATTCAAATG	0	153
GT1889	ATTAATCCATTAAGGTTACCGTACACAGCCGTCGGATGGAGATGATGTGGGAAAGAAGTGGATCGTTGCG	135	0
	ATTAATCCATAAGGTTACCGTACACAGCCGTCGGATGGAGATGATGTGGGAAAGAAGTGGATCGTTGCGT	0	136
GT1890	ATTAAATTTATATTAGTTTGGTTGTCGGCGAATTTTGAAGAGGTCCAAGTGTCCTTCGGATGCGTTTGTT	136	0
	ATTAAATTTATATTAGTTTGGTTGTCGGCGAATTTTGAAGAGGTCCAAGTGTCCTTTGGATGCGTTTGTT	0	134
GT1892	ATTAATTTGTGAATATAGTACAATAGAACGGTTGACTTAATATGATATTTTTTAGTTCACAATCTAAGTT	136	0
	ATTAATTTGTGAATATAGTACAATAGAACGGTTGACTTAATATGATATTTTTTTAGTTCACAATCTAAGT	0	94
GT1895	ATTAAAATTTAAATGAAAGAGATCATAAAATCAAAGTTTAGGTACTCCAATGGTTTATTTTTACACTTAT	137	0
	ATTAAAATTTAAATGAAAGAGATCAAAAAATCAAAGTTTAGGTACTCCAATGGTTTATTTTTACACTTAT	0	77
GT1896	ATTAAACCCTATTCACCCCCCCTCTAGGGTTGCCATACCGATCCAACAGAGGATCGAAAACTTGATAATG	137	0
	ATTAAACCCTATTCACCCCCCCTCTAGGGTTGCCATACCGATCCAACAGAGGATCGACAACTTGATAATG	0	132
GT1897	ATTAATCAATTATTGATCATTAGAGTTCAAAGTTGTAGGTCGATAAATGATGTTGATTATTTAATTTAAA	137	0
	ATTAATCAATTATTGATCATTAGAGTTCAAAGTTGCAGGTCGATAAATGATGTTGATTATTTAATTTAAA	0	68
GT1898	ATTAAAACTTATATTTGAATCATATTTCCAGCTCCCTTATCGATCTCTTGTCTCTAAAATTGTAGGAATA	138	0
	ATTAAAACTTATATTTGAATCATATTTCCAGCTCCCTTATCGATCTCTTGTCCCTAAAATTGTAGGAATA	0	182
GT1899	ATTAAAGATATCCTTTTCCAATTTAGGATTGAAATGACAGCTAAATGTTTGACGATTATACTGTATATGA	138	0
	ATTAAAGATATCCTTTTCCAATTTAGGATTGAAATGACAGCTAAATGTTTGGCGATTATACTGTATATGA	0	133
GT1902	ATTAATGAGTTTGAAGTCGAGGTCGAGAACGACTTATCGAGCTCGAAATTTGGCCTTGAAGCTTCAACCG	138	0
	ATTAATGAGTTTGAAGTCGAGGTCGAGAACGACTTACCGAGCTCGAAATTTGGCCTTGAAGCTTCAACCG	0	193
GT1903	ATTAATGTTTTCCACCAAAGAATAATCTTACGAAATCTGCCATCAATGTTTTCAAATCTCTCTCCATTCT	138	0
	ATTAATGTTGTCCACCAAAGAATAATCTTAAGAAATCTGCCATCAATGTTTTCAAATCTCTCTCCATTCT	0	172
GT1908	ATTAAGGCCAATTTGTAGTTGAATTAGCTAGATATATCTACTACTCTAGGTTTATTGGGGATAGACTAAG	139	0
	ATTAAGGCCAATTTGTAGTTGAAGTAGCTAGATATATCTACTACTCTAGGTTTATTGGGGATAGACTAAG	0	150
GT1909	ATTAAGGGCAGCTCGCCTTTTTGAATAGAAGGAAGTGGGATAGCGGAGGTGATTTCGGTAAACTGATGCA	139	0
	ATTAAGGGCAGCTCGCCTTTTTGAATAGAAGGAAGTGGGATAGCGGAGGTGATTTCGGTAAACCGATGCA	0	90
GT1910	ATTAAAAAAAACATTTCGAAAGAGTACAGTACCTGTTGCGTGAGCCGAACTCTTACAAATGTATATTACA	140	0
	ATTAAAAAAAACATTTCGAAAGAGTACAGTACCTGTTGCGTGAGCCGAACTCTTACGAATGTATATTACA	0	127
GT1912	ATTAAAATGATCATATGATTAAAAAAATTTTTTTTAATCTTTAAGTCAATTCCCAAAATCATTCAGCCAG	140	0
	ATTAAAATGATCATATGATTAAAAAAAATTTTTTTAATCTTTAAGTCAATTCCCAAAATCATTCAGCCAG	0	108
GT1916	ATTAACTATCAAAGTTCGCAAACAACCCAATTTGGATAGAAGCATTTTGGGTTTTAAATTAAATTCTTAC	140	0
	ATTAACTATCAAAGTTCGCAAACAACCCAATTTGGATAGAAGCATTTTGGGTTTTAAATAAATTCTTACC	0	117
GT1917	ATTAATAAGAAATACATAGCCGAGAAGAGAGACTCAAACATAAAAGGAAACAAAGATAAAATAACAATTA	140	0
	ATTAATAAGAAATACATAGCCAAGAAGAGAGACTCAAACATAAAAGGAAACAAAGATAAAATAACAATTA	0	130
GT1921	ATTAAACTACCTCTCTATTAGGGTTACAAATTTTATTGGGATATATGACTTTTGCCAACAAAATTTAAAT	141	0
	ATTAAACTACCTCTCTATTAGGGTTACAAATTTTATTGGGACATATGACTTTTGCCAACAAAATTTAAAT	0	140
GT1923	ATTAACAAAGACTTTGAGAGTATTCAAGTGATTGCGAAATAATTTTAACTTTTTTTTATTCATAAAATTG	141	0
	ATTAACAAAGACTTTGAGAGTATTCAAGTGATTTGCGAAATAATTTTAACTTTTTTTTATTCATAAAATT	0	164
GT1927	ATTAATAAATTAATTTCCACTCCTTTATGATTCAACACCACATATTTATATCCATCTTTGTGGATCATAG	142	0
	ATTAATAAATTAATTTCCACTCCTTTATGATTTAACACCACATATTTATATCCATCTTTGTGGATCATAG	0	116
GT1928	ATTAATGGTTCTATTACAAATTTTTAGCAAAAACTCAATTAATAATTAAACAAAAAATAATTTTTTCTTT	142	0
	ATTAATGGTTCTATTACAAATTTTTAGCGAAAACTCAATTAATAATTAAACAAAAAATAATTTTTTCTTT	0	122
GT1930	ATTAATTTATTACAAAAATGTCATTTCAATTTCTTATTATTACTTCGATCTTCTAATTTGTTTTTTAACA	142	0
	ATTAATTTATTACAAAAATGTCATTTCAATTTCTTATTATTACTTCGATCTTTTAATTTGTTTTTTAACA	0	101
GT1932	ATTAAAGGAGACGAAAGATTGTAAATTATAATAAACAATCAAAAAATTTTAAGGGAGCGTTTGCATTATT	143	0
	ATTAAAGGAGAAGAAAGATTGTAAATTATAATAAACAATCAAAAAATTTTAAGGGAGCGTTTGCATTATT	0	138
GT1937	ATTAAATGACCAATTATTAATAGAAAATGCTATTTGTTTTTATTGCTATGTTATCTAAATAACGACAATA	144	0
	ATTAAATGACCAATTATTAATAGAAAATGCTATTTGTTTTTATTGCTATGTTATCTAAATAAGGACAATA	0	188
GT1939	ATTAATATTTTTATTGTTTTAAGTTCTAAAAAAATATTTGACTAAATTTGTCTCTAAATCAATCATAAAA	144	0
	ATTAATATTTTTATTGTTTTAAGTTCTAAAAAAATATTTGACTAAATTTGTCTCTCAATCAATCATAAAA	0	140
GT1941	ATTAACAAAGGGGGATTCTTTTTTTTCTTCCCCTTTTTTGAGTTTCAAAAATCTGGGTTCTTTCATAAAA	145	0
	ATTAACAAAGGGGGATTCTTTTTTTTCTTCCCCTTTTTTGAGTTCCAAAAATCTGGGTTCTTTCATAAAA	0	180
GT1943	ATTAATCAAACTACTCTTTCTCCTGCATTACTTTCCTTTGAAATGACAAAAGAGAAATCACATTCTTTTA	145	0
	ATTAATCAAACTACTCTTTCTCCTGCATTAATTTCCTTTGAAATGACAAAAGAGAAATCACATTCTTTTA	0	130
GT1944	ATTAATTTGTTGCTATCTCAAATTAATTGATTTTGATAGTCATTAAATTACTTGATTTTGATAGTCATTT	145	0
	ATTAATTTGTTGCTATCTCAAATTAATTGATTTTGATAGTTATTAAATTACTTGATTTTGATAGTCATTT	0	158
GT1947	ATTAAACACTTTTACAGTCTGGGGACTTACACACAATTAAAAATTCAGAGACCTATTAGATATATTTTAA	146	0
	ATTAAACACTTTTACAGTCCGGGGACTTACACACAATTAAAAATTCAGAGACCTATTAGATATATTTTAA	0	106
GT1948	ATTAAATCATACTGTTACTACTGGAACAGTATCCACCTATATATCAAATATAGACTGTATATTAAATATA	146	0
	ATTAAATCATACTGTTACTACTGGAACAGTATCCACCTATATATCAAATATACACTGTATATTAAATATA	0	138
GT1949	ATTAACAATTAATTTAGAAATTAAATGAAAAATCTCCTGATTCGAGACTAACTAACTTGAGGGGCTCGGT	146	0
	ATTAACAATTAATTTAGAAATTAAATGAAAAATCTGCTGATTCGAGACTAACTAACTTGAGGGGCTCGGT	0	91
GT1950	ATTAACATTAATCAATTACTTCCTACTCAATTTCAATTTCATTAGAAAATAGGTTTGAGATTATTCTTTT	146	0
	ATTAACATTAATCAATTACTTCCTACTCAATTTCAATTTCATTAGAAAAAAGGTTTGAGATTATTCTTTT	0	115
GT1951	ATTAAGAGTAGCAAAAATATGGAAAGAACTATATGAGAGGGCAGAATCATCTTCGTTAAGAAGACCTGGC	146	0
	ATTAAGAGTAGCAAAAATATGGAAAGAAATATATGATAGGGCAGAATCATCTTCGTTAAGAAGACCTGGC	0	105
GT1952	ATTAATAAAGAGGCACACCTTGAAACGAATAGAAGCTCTTTTAAAAGGAAAAAATAAAGTTCAGGCATTA	146	0
	ATTAATAAAGAGGCACACCTTGAAACGAATAGAAGCTCTTTTAAAAGGAAAAATAAAGTTCAGGCATTAG	0	161
GT1953	ATTAACTTCTAACACGTGTGAACTGTTGTCTTATTATTTTTCGTAGGCAATTGGTTCAAGCGGATGCACT	147	0
	ATTAACTTCTAACACGTGTGAACTGTTGTCTTATTATTTTTCGTAGGCAATTGGTTCAAGCGGATACACT	0	191
GT1956	ATTAATTACTGGGATACAAATATTTTTATTCCACCTAAATCAAGTAGAAGCTAACCTTGTTTTGGTCTAG	147	0
	ATTAATTATTGGGATACAAATATTTTTATTCCACCTAAATCAAGTAGAAGCTAACCTTGTTTTGGTCTAG	0	117
GT1957	ATTAATTCGTAGAAACATAAAAAATTATACATATACCAATTACATTGAGCTATGCTCACTTTGGCGTCTA	147	0
	ATTAATTCGTAGAAACATAAAAAATTATACACATACCAATTACATTGAGCTATGCTCACTTTGGCGTCTA	0	109
GT1959	ATTAAATAATCCGTCAATAATATTAGGTTCAATCAAGCAGTGTACTTTTTGAGTGTTCGAACCAGTTAAT	148	0
	ATTAAATAATCCCTCAATAATATTAGGTTCAATCAAGCAGTGTACTTTTTGAGTGTTCGAACCAGTTAAT	0	180
GT1965	ATTAAGAGACTAAAATATCTCAAACTCCTCCTAGGGATTTTTTTTTTCACCAAAAAAATTCATATATCAA	148	0
	ATTAAGAGACTAAAATATCTCAAACTCCTCCTAGGGATTTTTTTTTCACCAAAAAAATTCATATATCAAT	0	149
GT1967	ATTAATGTTGGTGGACCTCACATCATTTTTAAATGATACTGACGTCGCGTACAATAAAGGACCGTAGTAT	148	0
	ATTAATGTTGGTGGACCACACATCATTTTTAAATGATACTGACGTCGCGTACAATAAAGGACCGTAGTAT	0	162
GT1968	ATTAATTGAAAAGAAGGAGATATACTGATGATCTTGAGATTTCCGTTAGATTAAGGAGAATGTATCCTAT	148	0
	ATTAATTGAAAAGAATGAGATATACTGATGATCTTGAGATTTCCGTTAGATTAAGGAGAATGTATCCTAT	0	104
GT1969	ATTAAAAAACAATGCATTAGAAAAAAAATAGGACCACTGATCAAGTCATAAAACACAATTATCCCAAAAG	149	0
	ATTAAAAAACAATGCATTAGAAAAAAAATAGGACCACTGATCAAGTCATAGAACACAATTATCCCAAAAG	0	177
GT1971	ATTAACATAATTATTTTTTTTCTAGATTTGAAATTTTAAAAAGCCAGTGCATATTTGTTAAACAAATAAA	149	0
	ATTAACATAATTATTTTTTTTCTAGATTTGAAATTTTAAAAAGCTAGTGCATATTTGTTAAACAAATAAA	0	61
GT1974	ATTAATAAACATATTAGATTATTTGGGCACTAACTTAGTGGATAAAAGTTAAAACACCTATAACTTTTCA	149	0
	ATTAATAAACATATTAGATTATTTGGGCACTAACTTAGAGGATAAAAGTTAAAACACCTATAACTTTTCA	0	134
GT1976	ATTAAAGAGGATCGAAAACAAAGTTGTAATTTTGTTTTAATCAATACTCCCGCAACACATACTCGTTTTA	150	0
	ATTAAAGAGGATCGAAAACAAAGTTGTAATTTTGTTTTAATCAATACTCCCGCAACAAATACTCGTTTTA	0	104
GT1977	ATTAAAGTATAGTAATTATAGAAAATGCCTACCACCGGTGCTCGCCTCTTCAATGATATTACTTCTCAGA	150	0
	ATTAAAGTATAGTAATTATAGAAAATACCTACCACCGGTGCTCGCCTCTTCAATGATATTACTTCTCAGA	0	114
GT1978	ATTAACCTATCTTGATAGTGACAGTATTGTTTAAAGATTATATAGTAAGAATTGTTTTTGGTGTAGACAT	150	0
	ATTAACCTATCTTGATACTGACAGTATTGTTTAAAGATTATATAGTAAGAATTGTTTTTGGTGTAGACAT	0	99
GT1979	ATTAATATATGATGAGAAGGGTAAGCAGAAATTTAATTTATCCCATTTTTTCTCGTCTTATTTCTTCTAT	150	0
	ATTAATATATGATTAGAAGGGTAAGCAGAAATTTAATTTATCCCATTTTTTCTCGTCTTATTTCTTCTAT	0	158
GT1980	ATTAATGAGGGACAAGGAAGACATTTTCTATGTGTTTGAATCAAAGTCATAACCGTGAGTCTTAAGTCAA	151	0
	ATTAATGAGGGACAAGGAAGACATTTCCTATGTGTTTGAATCAAAGTTATAACCGTGAGTCTTAAGTCAA	0	156
GT1982	ATTAAAAAAACGCTAAATTTTTTTATAAGCCAAGCGAATAAATTCAAACCTACCAACCATAAATGAAATT	152	0
	ATTAAAAAAACGCTAAATTTTTTTTATAAGCCAAGCGAATAAATTCAAACCTACCAACCATAAATGAAAT	0	199
GT1983	ATTAAACACACAATTTGGGCCAAAAAACATATTTTTTAGTAAAAAAAACGTGGAAATGGAAAATTTAACC	152	0
	ATTAAACACACAATTTGGGCCAAAAAACATATTTTTTAGTAAAAAAAATGTGGAAATGGAAAATTTAACC	0	169
GT1984	ATTAAATTTAAAATGAAGCTAAATTACAGTACTACCCCTTAGTTCAAAAAATTAAACGGTTTGCTCTCCT	152	0
	ATTAAATTTAAAATGAAGCTAAATTACAGTACTACCCCTTAGTTCAAAAAATCAAACGGTTTGCTCTCCT	0	279
GT1987	ATTAATTTTTAAAAACTTTATTTGATACCTGGTCTTAAATAATTATTCTCTCAAATCCTTTTAAACAATG	153	0
	ATTAATTTTTAAAAACTTTATTTGATACCTGGTCTTAAATAATTATACTCTCAAATCCTTTTAAACAATG	0	109
GT1988	ATTAAGAGTGAAAATGGTAATAAATATAATACAATTAAGATAAAAGATAGGAAGGATAAAAAAAATTAAG	154	0
	ATTAAGAGTGAAAATGGTCATAAATATAATACAATTAAGATAAAAGATAGGAAGGATAAAAAAAATTAAG	0	88
GT1990	ATTAATTCTTTAAAGGCGGCAGGACGACCAATATCAAATGAGGATCACATTCTACATATTCTTTCGGGAC	154	0
	ATTAATTCTTTAAAGGCGGCAGGACGGCCAATATCAAATGAGGATCACATTCTACATATTCTTTCGGGAC	0	193
GT1992	ATTAACGATAATAACTGTTAAACTTGATAGTACTACCAAAAGCAGGATTGAAATGTTTTTAAAGTTCAAG	155	0
	ATTAACGATAATAACTGTTAAACTTGATAGTACTACCAAAAGCAGGATTAAAATGTTTTTAAAGTTCAAG	0	164
GT1994	ATTAATATAAGTGTAGATTAAACTAGGATTTAGTTTCTAACTATATATCGTTAAAAAATAATTTTTTAAA	155	0
	ATTAATATAAGTGTAGATTAAACTAAGATTTAGTTTCTAACTATATATCGTTAAAAAATAATTTTTTAAA	0	85
GT1997	ATTAAAATAATTTGAAAGTTTGAGTTTGAATCTCTTAATGTTCAACACATTGCACCAACTTTGGATTTTT	157	0
	ATTAAAATAATTTGAAAGTTTGAGTTTGAATCTCTTAATGTTTAACACATTGCACCAACTTTGGATTTTT	0	136
GT1998	ATTAAATATGTATCGATATAGATATTTATTATCATTCTTGAGTTAAATAGATGATGACCAATTTTTTTTT	157	0
	ATTAAATATGTATCGATATAGATATTTATTATCATTCTTGAGTTAAATAGATGATGACCAATTTTCTTTT	0	105
GT1999	ATTAAGTTAAAAATACTTCGTGCAACACACGTAGTAGCACGCTAGTATTTAAAAAAAGAAACAACCAATG	157	0
	ATTAAGTTAAAAATACTTCGTGCAACACACGTAGTAGCACGCTAGTATTTAAAAAAAAGAAACAACCAAT	0	112
GT2001	ATTAATGTTCATATTTCTAGTGCTTGAAATTTTAAAAAAAATTACATAAAATTATTACATTTTTCAATCA	157	0
	ATTAATGTTCATATTTCTAGTGCTTGAAATTTTAAAAAAATTACATAAAATTATTACATTTTTCAATCAT	0	105
GT2003	ATTAAAAATAAAAACTTAGTACATTAAATGTTAATTACGATTTACGTTCCGATTTACGATTTAATAACCT	158	0
	ATTAAAAATAAAAACTTAGTACATTAAACGTTAATTACGATTTACGTTCCGATTTACGATTTAATAACCT	0	152
GT2005	ATTAACCTTTAAATTTAGAAACCTATTAGAGCAAAATAAGTTACTATTTATTATTTAGTTCGTTGGAATA	160	0
	ATTAACCTTTAAATTTAGAAACCTATTAGAGCAAAATAAGTTACTATTTATTATTTAGTTTGTTGGAATA	0	119
GT2007	ATTAAAATATTGCAGTTTGATATAGATGACGTGGAAATGTCACCTACGTTATTTGGTTGACTAAAGCAAG	161	0
	ATTAAAATATTGCAGTTTGATATAGATGACGTGGAAATGTCACCTACATTATTTGGTTGACTAAAGCAAG	0	277
GT2009	ATTAAACCATATTCACCCCTAGGGTTGTCATACCGATCCAACACAACCCACGAAGGAAGACGACGGTGAG	162	0
	ATTAAACCCTATTCACCCCTAGGGTTGTCATACCGATCCAACACAACCCACGAAGGAAGACGACGGTGAG	0	171
GT2011	ATTAAGATGGAATGATGTGTCTTCAAAATTCAAGGGTTAAACACATATCATCAATGAAATATCCATTTTT	162	0
	ATTAAGATGGAATGACGTGTCTTCAAAATTCAAGGGTTAAACACATATCATCAATGAAATATCCATTTTT	0	153
GT2013	ATTAAAATAATAAAATATAACACTTTTGGGTATCTTAAGAATTAGTTGCTTCAAATATGTTTGCTAAACT	163	0
	ATTAAAATAATAAAATATAACACTTTGGGTATCTTAAGAATTAGTTGCTTCAAATATGTTTGCTAAACTA	0	146
GT2015	ATTAATTAGACAAAAGGCTAAATAGTGACCAGGAATGAAATTTTCAGCTACAAATAGAGAAGGTCAAGCA	163	0
	ATTAATTAGACAAAAGGCTAAATAGTGACGAGGAATGAAATTTTCAGCTACAAATAGAGAAGGTCAAGCA	0	222
GT2016	ATTAAATTAATGAATATTTTAATCATATTCAAATATACTTATCCCTCCTAACCTATAGAATTTAATATGA	164	0
	ATTAAATTAATGAATATTTGAATCATATTCAAATATACTTATCCCTCCTAACCTATATAATTTAATATGA	0	133
GT2017	ATTAACAAAATATATGTTAGCGTCATTTTATCGTTTATGGACAATAAAAACTCAATCAAAAAAATCAACA	164	0
	ATTAACAAAATATATGTTAGCGTCATTTTATCGTTTATGGACAATAATAACTCAATCAAAAAAATCAACA	0	205
GT2018	ATTAACGTCTCAATTGTGCCCTAAAAACTTATTTCTATATTGTCAAAAGAGTTTTGCTTCTCCATTGTCT	164	0
	ATTAACGTCTCAATTGTGCCCTAAAAACTTATTTCTATATTGTCAAAAGAGTTTTGATTCTCCATTGTCT	0	186
GT2019	ATTAATAAATTGTTTTTTCTTAGATGTTTCCGAGATCTCTCCTTCTATTAACTGAACTGTATTGGCTGAA	164	0
	ATTAATAAATTGTTTTTTCTTAGATGTTTCCGAGATCTCTCCTTCTATTAACTGAACTCTATTGGCTGAA	0	217
GT2022	ATTAAATTAATTCCAACAATCTCCCACTTAGGTAATAGAATTCTACGACAAATCATATAAGTTTCAAGTT	166	0
	ATTAAATTAATTCCAACAATCTCCCACTTAGGTAATAGAATTCTACAACAAATCATATAAGTTTCAAGTT	0	129
GT2027	ATTAAAACTATTTTTATAACAAGTGTTTGAAAAAGAAAATGTTTGTTTAAAAGGTGTTTAAATCAGAAGG	168	0
	ATTAAAACTATTTTTATAACAAGTGTTTGAAAAAGAAAATGTTTGTTTAAAAGGTGTTTAAATTAGAAGG	0	172
GT2028	ATTAAACCTCACTTGAATGTTCGAGACTTACCATCTAAATCAAGAATTTCAAACGATGAACTCGAAGCTA	168	0
	ATTAAACCTAACTTGAATATTCGAGACTTACCATCTAAATCAAGAATTTCAAACGATGAACTCGAAGCTA	0	184
GT2029	ATTAAATTTATCTAACACATCAACTTAAATTAATTTTGAGTTGAGTGGTGGTTTATTCATCGTTAAGATG	168	0
	ATTAAATTTATCTAACACATCAACTTAAACTAATTTTGAGTTGAGTGGTGGTTTATTCATCGTTAAGATG	0	174
GT2032	ATTAAGGGCGAAGATTTAAACTTGGAAATGAATGCAGATTATTTACACCAGAATCTGATGGTTGATGGTG	168	0
	ATTAAGGGCGAAGATTTAAACTTGGAAATGAATGCAGATTATTTACACCAGAATTTGATGGTTGATGGTG	0	113
GT2034	ATTAAAATATGTTTGGGGATGAAATATCCAATCGCCACGTGGAGGACGGCGACTTGTCGCTGAAAGAAGA	169	0
	ATTAAAATATGTTTGGGGATGAAATATCCAATCGCCACGTGGAGGACGGGGACTTGTCGCTGAAAGAAGA	0	92
GT2035	ATTAAGGTTTTGTTTTTAACTTTTTTTTTTCAATCTTTAAGATAGTGTGGGCAATCTAGTGTGAAACGCA	169	0
	ATTAAGGTTTTGTTGTTAACTTTTTTTTTTCAATCTTTAAGATAGTGTGGGCAATCTAGTGTGAAACGCA	0	151
GT2036	ATTAATCTAGTTGATTTTACTTGCTGGCCACTTGTCTAAATCACAACAGTTGAGTTTAATTCTGAAAAAG	169	0
	ATTAATCTAGTTGATTTTACTTGCTGGCCACTTGTCTAAATCACAACAGTTGAGTTTAATTCTGAAAAGG	0	121
GT2037	ATTAAAAAGTTCACGACTTTTTATAAGATATCAATGAATATAATGTTGTTAAGTTAATGGAAAGAAAAGA	170	0
	ATTAAAAAGTTCACAACTTTTTATAAGATATCAATGAATATAATGTTGTTAAGTTAATGGAAAGAAAAGA	0	130
GT2040	ATTAACCCTAATTCGTTTGGACCACGTATGATGGTTACAAAAAAAAACTATGGGTCCCTAAAATATTATT	170	0
	ATTAACCCTAATTCGTTTGGACCACGTATGATGGTTACAAAAAAAACTATGGGTCCCTAAAATATTATTT	0	166
GT2043	ATTAAAAAACAGACGCTTGCAAGGCAGGTTTCGTAAAATACAAAAGATATATATGTAGCTGAAGAATATT	172	0
	ATTAAAAAACAGACCCTTGCAAGGCAGGTTTCGTAAAATACAAAAGATATATATGTAGCTGAAGAATATT	0	210
GT2047	ATTAAGGATAATAATTCAATGTAACAAATTACTTGTGGATGTAACATAACATATGCTATTTTGTTCTAAC	172	0
	ATTAAGGATAATAATTCAATGTAACAAATTATTTGTGGATGTAACATAACATATGCTATTTTGTTCTAAC	0	102
GT2050	ATTAATTACAAAAATAATAAACTAAGGCATACACTACACCCTTTACAATTATCCCACTTGCCTAAGAAGT	173	0
	ATTAATTACAAAAACAATAAACTAAGGCATACACTACACTCTTTACAATTATCCCACTTGCCTAAGAAGT	0	199
GT2052	ATTAACTTCTTGTTAACAAGGTACAAGGTTTGAACGTAACTTATCCTTGGTTTCTTAAACAATTTTGTAG	174	0
	ATTAACTTCTTGTTAACAAGGTACAAGGTTTGAACATAACTTATCCTTGGTTTCTTAAACAATTTTGTAG	0	215
GT2053	ATTAATGTTTATTAGGATGACGAGAACGTACTTCAATAAAAAATTAGAAATCTTAGAAATGAGATGACAC	174	0
	ATTAATGTTTATTAGGATGACGAGAACCTACTTGAATAAAAAATTAGAAATCTTAGAAATGAGATGACAC	0	107
GT2054	ATTAATTTTGTCCCTTTGTTTGGCTAGAATCTATTATGCAGACTATGTAAACATCGAAAAGCCATAAATA	174	0
	ATTAATTTTGTCCCTTTGTTTGGCTAGAATCTATTATGCAGACTATGTAAACATGGAAAAGCCATAAATA	0	52
GT2056	ATTAATTATCAACTGTATCAATTTTATTGTTGTTTATATGATTTTTTTTTTCAACATAAACATTGTTGTA	175	0
	ATTAATTACCAACTGTATCAATTTTATTGTTGTTTATATGATTTTTTTTTTCAACATAAACATTGTTGTA	0	135
GT2058	ATTAATAAATAAATAAATTACGACAACAAAAATTTGGAGCAATTATTTAGTTTAAAATAAGACACCACCT	176	0
	ATTAATAAATAAATAAATTACGACAACAAAAATTTGGAGCAATTATTTAGTTTAAAATAAGACCCCACCT	0	133
GT2061	ATTAAATTTTGAAAAAAAAATAATTGGAATCTAACTCTAATACAATACAGTAAAATTATAACGAAAATAA	177	0
	ATTAAATTTTGAAAAAAAAATAATTGGAATCTAACTCTAATACAATACAGTAAAATTATATCGAAAATAA	0	118
GT2062	ATTAACCATTATCCCAGTATATATAAACTCCAAAATCTATTACATTTGATGTTACAAATATTCAATAGTT	177	0
	ATTAACCATTATCCCAGTATATATAAACTCCAAAATCTATTACATTTGATGTTACAAATATTCGATAGTT	0	130
GT2063	ATTAAGATTAATCATATTTAACTCAAAATATATGGCACGTATTTGCCTCTCATCCTTTACTCGCTTGACT	177	0
	ATTAAGATTAATCATATTTAACTCAAAATATATGGCACGTATTTGTCTCTCATCCTTTACTCGCTTGACT	0	138
GT2065	ATTAAAACTACTTTTTTTTAATTATTAAATGAAAGTCAAATTATTAACAAATGGCTTAATTTGGTTTATT	178	0
	ATTAAAACTACTTTTTTTTAATTATTAAATGAAAGTCAAATTATTAACAAATGGCTAAATTTGGTTTATT	0	87
GT2066	ATTAAATATGGTTGATTTGAATTTTTTTCCCACTTACATAAGAAACTGTACTGAAATTTAATGAGAGAAA	178	0
	ATTAAATATGGTTGATTTGAATTTTTTTCGCACTTACATAAGAAACTGTACTGAAATTTAATGAGAGAAA	0	220
GT2068	ATTAATGTGTAGAATTAAAAAGAAAAAGGTGGATGAGTGAATTGTTGAGAATTTAGATTCATTATTGAAT	178	0
	ATTAATGTGTAGAATTAAAAAGAAAAAGGTGGATGAGTGAATTGTTGAGAATTTAGATTCAATATTGAAT	0	200
GT2069	ATTAATATGTTATTTCAAGTTTAGGGGTTAAATTTGTTATGAAACTTGATATGGTCGGAGACCAGAAGCT	179	0
	ATTAATATGTTATTTCAAGTTTAGGGGTTAAATTTGTTATGAAACTTGATATGGTCGGAGACTAGAAGCT	0	268
GT2070	ATTAAATTAAAATAAAAATGAAAAAAAATGAAAATGAAAATGGGAGGAAAAACCTTCCACTTTCCACAGT	180	0
	ATTAAATTAAAATAAAAATGAAAAAAAATGAAAATGAAAATGAGAGGAAAAACCTCCCACTTTCCACAGT	0	116
GT2072	ATTAATAGAAACTGTTCATAAATAATAAGAACAAGAAACAAAGAATACTTGAAAAAGAAGAAATCTCTAT	180	0
	ATTAATAGAAACTGTTCATAAATAATAAGAACAAGAAACAAAGAATACTTGAAAAAGAAGAAATTTCTAT	0	176
GT2073	ATTAATCATATCCCATTTTTGGATGATAAAACCAATGATTCATTTGTAGTCACTTCCTCCAAACTTGCTA	180	0
	ATTAATCACATCCCATTTTTGGATGATAAAACCAATGATTCATTTGTAGTCACTTCCTCCAAACTTGCTA	0	291
GT2074	ATTAAACGAAGCTCACTAATAATTATGGCATATATTTCCAGTTATGAAGTTAGCGAATTCGATCTCCAAT	181	0
	ATTAAACGAAGCTCACTAATAATTATGGCATATATTCCCAGTTAAGAAGTTAGCGAATTCGATCTCCAAT	0	169
GT2077	ATTAATAATCATTAATCCTAGCCTCAGCTTTTTATTTCCAAATTGTTTTGAAAAGGAGGAAAGAAAAATA	181	0
	ATTAATAATCATTAATCCTAGCCTCAGCTTTTTATTTCCAAATTGTTTTGAAAAGAAGGAAAGAAAAATA	0	113
GT2079	ATTAAACATACATTCATAATGCATAATAATTAAATAGTAAATTTGGATCGGTTTTTGGCATACTAGGAGA	182	0
	ATTAAACATACATTCATAATGCATAATAATTAAATAATAAATTTGGATCGGTTTTTGGCATACTAGGAGA	0	118
GT2080	ATTAAAAGAAGGCGTGGATTTTGAATTTGCAACTTTCGAGGGAACTAGAATAGTCCATCATTTTTTTCCC	183	0
	ATTAAAAGAAGGCGTGGATTTTGAATTTGCAACTTTTGAGGGAACTAGAATAGTCCATCATTTTTTTCCC	0	123
GT2081	ATTAACTCCCCAGACTTCACAACTCCACTCTGTCGCTTGAACACCCCCTTAGAGATTTTCATACTCCAGC	183	0
	ATTAACTCCCCAGACTTCACAACTCCACTCTGTCGCTTGAACACCCCCTTAGAGATTTTGATACTCCAGC	0	184
GT2084	ATTAAAAAATAACTAGATCTAGTCATTGTGTTTTCTTTATTTTACAATAAAATATATAGATGAAAACTCG	184	0
	ATTAAAAAATAACTAGATCTAGTCATTGTGTTTTCTTTATTTTACAATAAAATATGTAGATGAAAACTCA	0	162
GT2085	ATTAAAAATATACATTCATAATGCATAAAATAATTAAATAGCAACGTTGGACTGGTTTTTGGCACCTTAA	184	0
	ATTAAAAATATACATTCATAATGCATAAAATAATTAAATAGCAACGTTGTACTGGTTTTTGGCACCTTAA	0	134
GT2086	ATTAAATTACGAAATTTTGGTTCAAGATTAAACAAACTTTGACTTTAGTCTAAGTAATTTTAATTTATTC	184	0
	ATTAAATTACGAAATTTTGGTTCAAGATTAAACAAATTTTGACTTTAGTCTAAGTAATTTTAATTTATTC	0	202
GT2088	ATTAAGTCTAACAAATTGTCATTATTGTAAACTATAGTATTTCACAAACAATTGAAACATTATGCATAGT	184	0
	ATTAAGTCTAACAAATTGTCATTATTGTAAACTATAGTATTTCCCAAACAATTGAAACATTATGCATAGT	0	198
GT2089	ATTAATAATATATCGATATTTTACGCATTTGTCAATCTTTTTAAATGTCGATTCACCACTTATATAAATA	184	0
	ATTAATAATATATGGATATTTTACGCATTTGTCAATCTTTTTAAATGTCGATTCACCACTTATATAAATA	0	161
GT2091	ATTAATTAGAGTCCCATTAAGATAATTTGCATATATAATAATAATTCATAAAGATAACACCATTATCTTT	185	0
	ATTAATTAGAGTCCATTAAGATAATTTGCATATATAATAATAATTCATAAAGATAACACCATTATCTTTC	0	91
GT2092	ATTAAATTAAGGAAAAAATACACTTTTGGTCCCTGAGGTTTGAGCCAGGTGTTTATTTGGTCCTTGAAGT	186	0
	ATTAAATTAAGAAAAAAATACACTTTTGGTCCCTGAGGTTTGAGCCAGGTGTCTATTTGGTCCTTGAAGT	0	163
GT2093	ATTAACAATCAATTTAAAATTAAATGAAAAATCTCCTGATCCAAGACTAACTGACCTGAGGGACTCAGGG	186	0
	ATTAACAATCAATTTAAAATTAAATGAAAAATCTCCTGATCCAAGACTAACTGACCTGGGGGACTCAGGG	0	182
GT2094	ATTAAGTAATAAAAAGCAGCTTGTTGGGTAATTTTTTGGTTTTTAAATATTGGGGTAAGTAAAAGTCAGA	186	0
	ATTAAGTAATAAAAAGCAGCTTGTTGGGTTATTTTTTGGTTTTTAAATATTGGGGTAAGTAAAAGTCAGA	0	123
GT2095	ATTAATAAAAAATGAAAGTTATGAATATCAAAAATTATGTTTATTTACTCCTAACTATTTATGATTTTAC	186	0
	ATTAATAAAAAATGAAAGCTATGAATATCAAAAATTATGTTTATTTACTCCTAACAATTTATGATTTTAC	0	149
GT2097	ATTAAATTCTTGGGTTTGAATTAGATCTGTGATTGTTTTTTTTAAGTGCTTTTAGGTTGAAATCTTCCTT	188	0
	ATTAAATTCTTGGGTTTGAATTAGATCTGTGATTGTTTTTTTTTAAGTGCTTTTAGGTTGAAATCTTCCT	0	163
GT2099	ATTAATTAGAAATTTAATATGGTATCAAATAGGCCTTAGTGAATGAAATGTAATTTTCTTACCTATAGAT	188	0
	ATTAATTAGAAATTTAATATGGTATCAAATAGGTCTTAGTGAATGAAATGTAATTTTCTTACCTATAGAT	0	144
GT2100	ATTAAAAAAAAAGGAAAAAAAGCATTTACCTTATTTCTTCATAACTATTTGCTTAAGTTTAGATATAAGT	189	0
	ATTAAAAAAAAAGGAAAAAAAGCATTTACCTTATTTCTTCATAACTATTTGCTTAAGTTTAAATATAAGT	0	147
GT2102	ATTAAAAATGAAACTTTAATCCAACCATTCAAACATCAAAGTTTGAAGCTATACAATCTAAAACAAAGAA	190	0
	ATTAAAAATGAAACTTTAATCCAACCATTCAAACATCAAAGGTTGAAGCTATACAATCTAAAACAAAGAA	0	169
GT2104	ATTAATAAAGATAATTAGTTTGCACTCGGGAGGGACAATTGAGATTTGAAAGTTCTTGACCTATAGATTT	190	0
	ATTAATAAAGATAATTAGTTTGCACTCGGGAGGGACAGTTGAGATTTGAAAGTTCTTGACCTATAGATTT	0	209
GT2106	ATTAAATAGCCCAAATTCAATTGATCTTTAATTTGTTCCACATATGAATTAATTTGTGGGTAACAAATTA	191	0
	ATTAAATAGCCCAAATTCAATTGCTCTTTAATTTGTTCCACATATGAATTAATTTGTGGGTAACAAATTA	0	124
GT2107	ATTAAGAGAGAATGAGTTCAAACCAATAATGACCACCTACCTTAGAAATTAGTAATTACTATATGTTTTC	191	0
	ATTAAGAGAGAATGAGTTCAAACCAATAATGACCACCTACCTTAAAAATTAGTAATTACTATATGTTTTC	0	195
GT2109	ATTAATCGAAATAGGAAGTCTAGAAATTCTAGGTGAAAGGTAGGTACAACGAGATATTTTATATCTTCTC	191	0
	ATTAATCGAAATAGGAAGTCTAGAATTTCTAGGTGAAAGGTAGGTACAACGAGATATTTTATATCTTCTC	0	181
GT2110	ATTAATTATACACGTCCGCACATAGTTCCCACGAAAAGAAAAGAAAAAAGACACCATTTTTTTAGTAAAA	191	0
	ATTAATTATACACTTCCGCACATAGTTCCCACGAAAAGAAAAGAAAAAAGACACCATTTTTTTAGTAAAA	0	211
GT2115	ATTAATTCATTCATTCATTAAACATCATTACTAGTGTACCCCAAAAGTCAAAAAATTCTTGGGATCTTTC	193	0
	ATTAATTCATTCATTCATTAAACATCATTACTAGTGTACCCCCAAAAGTCAAAAAATTCTTGGGATCTTT	0	164
GT2116	ATTAAAATGCACGTTTTGCCAAATTGTTCTTCAAAATTGCGCCAAGCGCAATTCCTGCAAAACAAAAAAC	194	0
	ATTAAAATGCACGTTTTGTCAAATTGTTCTTCAAAATTGCGCCAAGCGCAATTCCTACAAAACAAAAAAC	0	167
GT2119	ATTAATTATGATTACTCTGACTACTGCTGAAACTGTGTGTGTGTCTCTCCTCGTCGGAAGCCCTCAGGCC	194	0
	ATTAATTATTATTACTCTGACTACTGCTGAAACTGTGTGTGTGTCTCTCCTCGTCGGAAGCCCTCAGGCC	0	161
GT2120	ATTAACTAATAATTTAAATGTGTTGTCAAGAAGAGTGACAAAGATACTAAATAAACTATGAGAATTCGAA	195	0
	ATTAACTAATAATTTAAATGTGTTATCAAGAAGAGTGATAAAGATACTAAATAAACTATGAGAATTCGAA	0	99
GT2123	ATTAAGTAAACAAACGTTCGAACTTAATAATTAATTGTCCAAACCAAACTAAAAACATCCAACACGACCA	196	0
	ATTAAGTAAATAAACGTTCGAACTTAATAATTAATTGTCCAAACCAAACTAAAAACATCCAACACGACCA	0	216
GT2124	ATTAATATAGATTTGGATAAAGCTTTTCAAAAAGTGACAGTTTGATCCCGATCTTTAAAAAATAGTTCTA	196	0
	ATTAATATAGATTTGGATAAAGCTTTTCAAAGAGTGACAGTTTGATCCCGATCTTTAAAAAATAGTTCTA	0	233
GT2125	ATTAATTTAGCATTTTATTATGTTTAATGGTTTATTGGACTAATCCTAATTTTGCTAAATTAATTTTCTT	196	0
	ATTAATTTAGCATTTTATTATGTTCAATGGTTTATTGGACTAATCCTAATTTTGCTAAATTAATTTTCTT	0	131
GT2126	ATTAAAATGTATGTACACCATACTCTCTTTTTTTAATTATGTTTATATTACTACAATATATTACTCTCTT	197	0
	ATTAAAATGGATGTACACCATACTCTCTTTTTTTAATTATGTCTATATTACTACAATATATTACTCTCTT	0	232
GT2127	ATTAATACAACTCTTTTTGCTTGTCAACGTGAGTATACCTCAAATTAAGGCGTCTTATTCTTCTTGAGAT	198	0
	ATTAATACAACTCTTTTTGCTTGTCAACGTGAGTATACCTCAAATTAAGGCGTCTTATTCTTCCTGAGAT	0	187
GT2129	ATTAATGTTGCTATTTTGAAGGTTAGTTTGAAATAATTTTCAATTTGATACAAGAAAGAAAAAATTTGAG	199	0
	ATTAATGTTGCTATTTTGAAGGTTAGTTTGAAATAATTTTCAATTTGATACAAGAGAGAAAAAATTTGAG	0	175
GT2131	ATTAAAAACTATTTTAGTCTCATTTTAGTTTATTTTGATTTATCTACTTTCTACTTTTGTTTAACGGAAG	200	0
	ATTAAAAACTATTTTAGTCTCATTTTAGTTTATTTTGATTTTTCTACTTTCTACTTTTGTTTAACGGAAG	0	109
GT2132	ATTAAAATACACATTCATAATGCATAAAATAATTAAATAGCAAAGTTGGATCAGATTTTGGCACCTTAAG	200	0
	ATTAAAATACTCATTCATAATGCATAAAATAATTAAATAGCAAAGTTGGATCAGATTTTGGCACCTTAAG	0	187
GT2134	ATTAACGAGGAAGGATTAGGTCTGAAAAGAGAAGAAATGTGAAAGAAATTATCATTTTTAAACAGGGAAG	200	0
	ATTAACGAGGAAGGATTAGGTCTGAAAAGAGAAGAAATGTGAAAGAAATTATCATTTTTAAATAGGGAAG	0	65
GT2135	ATTAACTAATTCACAATCACACCAGCACGTTCCAAACTAAAATAGTTAATGCTTAATTATGAAACCAATA	200	0
	ATTAACTAATTCACAATCACACCAGCACGTTCCAAACTAAAATAGTTAATGCTTAATTATGAAAGCAATA	0	178
GT2137	ATTAATGATCATAATATTTGTATTTGTACGCATTTTATTGATTAAAAATTTGTATTCGTTATCTTAAAAA	200	0
	ATTAATGATCATAATATTTGTATTTGTACGCATTTTATTGATTAAAAATTTGTATTCGCTATCTTAAAAA	0	54
GT2138	ATTAATGTAAAGAAAATCCTTCTAACTAATCCGGGAGGAGTTTGACTATTTATTATTGTTGATTTTATTG	200	0
	ATTAATGTAAAGAAAATCCTTCTAACTAATTCGGGAGGAGTTTGACTATTTATTATTGTTGATTTTATTG	0	256
GT2140	ATTAACCTCTATTTACCGATAATAAAATGCACAAGTCCTTAATCACAAAATATGCACATTTTTCCTAAGA	203	0
	ATTAACCTCTATTTACCGATAATAAAATGCACAAGTCCTTAATCACAAAATATGCACATTTTTGCTAAGA	0	231
GT2141	ATTAATTTGTAACTATTATATGATTAATACAAATTCCAAATTTCTAATTGGCTAAAACTATACCAAACTG	203	0
	ATTAATTTGTAACTATTATATGATTAATACAAATTCCAAATTTTTAATTGGCTAAAACTATACCAAACTG	0	126
GT2142	ATTAAATTACCAACCCCACAGTTTTTGGTGGGGAGTGGTAAAGTGATGAGGTGGGGTAACTTCCCCACCA	204	0
	ATTAAATTACCAACCCCACAGTTTTTGGTGGGGAGTGGTAAAGTGATGAGGTGGGGTAACTTCACCACCA	0	180
GT2143	ATTAAGTTGCATACTTCTGTGAGAAATAGACTACACATTTTATAGATGAGATTTTGGAAGTATTGTCTTG	204	0
	ATTAAGTTGCATACTTCTGTGAGAAATAGACTACACATTTTATACATGAGATTTTGGAAGTATTGTCTTG	0	58
GT2144	ATTAAAGGCACTGACGATTGTTCCATTGTTTCTCCCCATCTCTGAGCATATTCTTACCCTGCAGTCTCTT	205	0
	ATTAAAGGCACTGACGATTGTTCCATTGCTTCTCCCCATCTCTGAGCATATTCTTTCCCTGCAGTCTCTT	0	208
GT2149	ATTAATAATTAAGGGGAAAAAACTCGAGAATCTGCTATGTTATTTAGCTGGACACGAACACTTCACGATT	206	0
	ATTAATAATTAAGGGGAAAAAACTCGAGAATCAACTATGTTATTTAGCTGGACACGAACACTTCACGATT	0	150
GT2151	ATTAATTTTTATCTCGAATTTGATAGGACGGGTCAGTCTTAATTAGTTTATACTTGAAAATTCATTAAAA	206	0
	ATTAATTTTTATCTCGAATTTGATAAGGCGGGTCAGTCTTAATTAGTTTATACTTGAAAATTCATTAAAA	0	176
GT2152	ATTAATGCACAAAATCAACAATGAAATAATTCCGAATTCTATGAATTCTATAAATTTATACCACAATTAA	208	0
	ATTAATGCACAAAATCAACAATGAAATAATCCCGAATTCTATGAATTCTATAAATTTATACCACAATTAA	0	134
GT2153	ATTAACTCAATCAAGATAAGCAATTTGAGCGTAAACGTTGTGATATCTGATAGATGTAATTAAAATGATG	209	0
	ATTAACTCAATCAAGATAAGCAATTTGAGCGTAAACGTTGTGCTATCTGATAGATGTAATTAAAATGATG	0	191
GT2156	ATTAACATAAAATCTATATAAGAAAAAACAATGAAAACTGGTTCATTAATAAAACGAACCTAACTCAACG	210	0
	ATTAACATAAAATCTATATAAGAAAAAACAATGAAAACTGGTTCATTGATAAAACGAACCTAACTCAACG	0	153
GT2157	ATTAACCGCGAATTCTAGTCGAAGGCCACGTAATAGTTCGGCTGGAGAGCAAGGGAACCTGAAACTAAAT	210	0
	ATTAACCGCGAATTCTAGTCGAAGGCCACGTAACAGTTCGGCTGGAGAGCAAGGGAACCTGAAACTAAAT	0	176
GT2160	ATTAACCTCTCCCAAAGTTGGACTTTTGTGTATAAATCAAGTTCCCACCAGTCGAATGGAAAAAAGATGT	213	0
	ATTAACCTCTCCCAAAGTTGGACTTTTGTGTATAAATCAAGTTCCCACCGGTCGAATGGAAAAAAGATGT	0	211
GT2164	ATTAATTAGTCGAGATTAAAGGTACAATTAACCAAGGCCCTCCATTCACTCTTGTGCCTTCATCGTGGCT	214	0
	ATTAATTAGTCGAGATTAAAGGTACAATTAACCGAGGCCCTCCATTCACTCTTGTGCCTTCATCGTGGCT	0	216
GT2166	ATTAAAGAACACATTAAGCCATTTTTAACCTTATTAATTTGTGTTTCACTTTGCTTAGAGATCATTCTCC	216	0
	ATTAAAGACCACATTAAGCCATTTTTAACCTTATTAATGTGTGTTTCACTTTGCTTAGAGATCATTCTCC	0	298
GT2167	ATTAATTGCCGCGCTCTCCCTTCCTATTGGTTTGGTTTGAGTTTCAAATTCGGACTTTGAAATTGTAATC	216	0
	ATTAATTGCCGCGCTCTCCCTTCCTATTGGTTTGGTTTGAGTTTCAAATTCGGACTTTGAAATGGTAATC	0	199
GT2168	ATTAAATAATTTGATCCGCTTTTTTCTAAAGTTTTGTTTTTAAAATTTTTTTCTTTCTAAATATTTTCTC	217	0
	ATTAAATAATTTGATCCGCTTTTTCCTAAAGTTTTGTTTTTAAAATTTTTTTCTTTCTAAATATTTTCTC	0	68
GT2170	ATTAATTGCAGGAAGATGAACTGGAATGTGCGCGAGCGGAAATGGGAGAAGTGAGAGAAGAAAACGAGAG	217	0
	ATTAATTACAGGAAGATGAACTGGAATGTGCGCGAGCGGAAATGGGAGAAGTGAGAGAAGAAAACGAGAG	0	249
GT2173	ATTAATTGGGGATGATTATGACTTTTTTTTCTTCTTCAGTATAACTGAAATTAAAAGGCCAAAGCGAGCA	221	0
	ATTAATTGGGGATGATTATGACTTTTTTTTCTTCTTCAGTATAACTGAAATTAAAAGGCCAAAGCAAGCA	0	161
GT2175	ATTAAAATAAAATGTTTCAAACTGCAATCGAGTTTTATTGGTAAAAATAGGTGATAAAATTGTGATTTGG	223	0
	ATTAAAATAAAATGTTTCAAACTGCAATCGAGTTTTATTGGTAAAAATAGGTGATAAAGTTGTGATTTGG	0	217
GT2176	ATTAACTTTTAGAACAAAGATCACTGTGGAGGGTGCCAAAGAAATAAAAAACGAAAATAAAAAGGTCTGC	223	0
	ATTAACTTTTAGAACAAAGATCACTGTGGAGGGTGCCAAAGAACTAAAAAACGAAAATAAAAAGGTCTGC	0	210
GT2177	ATTAAAGATAAATGTCATTGAGATAAGTTTAGATCGGTCACGTGAACAATGTTATTGGTATCGATTCTAA	224	0
	ATTAAAGATAAATGTCATTGAGATAAGTTTAGATTTGTCACGTGAACAATGTTATTGGTATCGATTCTAA	0	273
GT2178	ATTAAAGATTAATTGAGGATGCTTGATTGTGTGTATTAATGACACTGTCGGTGCATTTAAACAGGTTTAT	224	0
	ATTAAAGATTAATTGAGGATGCTTGATTGTGTGTATTAATAACACTGTCGGTGCATTTAAACAGGTTTAT	0	186
GT2179	ATTAAAAAAGTTATAGGTCTCGTTAATATATGAAGGAGAAATGACCGTAAAAGTAGAAAAGTAATTACAA	225	0
	ATTAAAAAAGTTATAGGTCTCGTTAATATATGAGGGAGAAATGACCGTAAAAGTAGAAAAGTAATTACAA	0	182
GT2180	ATTAAAGTTTAACTTTAAAATTGAATGAAAATCTCCTAATTCGAGACTAACTAACCTGAGGGACTCGGGG	226	0
	ATTAAAGTTTAACTTTAAAATTGAATGAAAATCTTCTAATTCGAGACTAACTAACCTGAGGGACTCGGGG	0	176
GT2182	ATTAAAAGGATTGATTCTGTTCTTTCTCGTTAAAGCCATAAAAGCCACATATAACGTGGCATCAGTGGGG	228	0
	ATTAAAAGGATTGATTCTGTTCTTTCTTGTTAAAGCCATAAAAGCCACATATAACGTGGCATCAGTGGGG	0	125
GT2183	ATTAAATTCGACTTGGCACTAGCTCGAACTAAGCACTAAATTAAGTTTTAGAATGCACGTGTGGCTAAAG	228	0
	ATTAAACTCGACTTGGCACTAGCTCGAACTAAGCACTAAATTAAGTTTTAGAATGCACGTGTGGCTAAAG	0	202
GT2184	ATTAACATATCTCAACACGTTAACATCTCATTCTAATTTTAAATTGGACTAATTCATTTTTAAAATTCGA	228	0
	ATTAACATATTTCAACACGTTAACATCTCATTCTAATTTTAAATTGGACTAATTCATTTTTAAAATTCGA	0	228
GT2185	ATTAAGAAAATCATCTCTGCTTATCATTAATGACATTGGGGCAATGAACATTTACAAATGCACTCATCTT	228	0
	ATTAAGAAAATCATCTCTGCTTATCATTAATGACATTGGGGCAATGCACATTTACAAATGCACTCATCTT	0	312
GT2186	ATTAATGATACTAGTGTGGCAAAAAAACAAATTGGAGTAGTACTCATACTACGGTAGTGCAGGAAAATTT	228	0
	ATTAATGATACTAGTGTGGCAAAAAAACAAATTGGAGTAGTACTCATACTACGGTAGTGTAGGAAAATTT	0	253
GT2187	ATTAAATCTCTTTGCTTAACTAGTTGGGTTTATTCAACTACTTTAAGTTTTCCTTCAGAGTCAACTGGCT	230	0
	ATTAAATCTTTTTGCTTAACTAGTTGGGTTTATTCAACTACTTTAAGTTTTCCTTCAGAGTCAACTGGCT	0	230
GT2188	ATTAACCCTAACTTCAAAATTTCACCCAAAATTTTACAATCGATAATTTTTTGCCTCCTACCTCCCTTTG	230	0
	ATTAACCCTAACTTCAAAATTTCACCAAAAATTTTACAATCGATAATTTTTTGCCTCCTACCTCCCTTTG	0	258
GT2189	ATTAAATGCATTGAATTAGGATTGCATACCTTTTAGGAACGTGGCTGCTCCTGTACTTGTCATTCAGCAA	235	0
	ATTAAATGCATTGAGTTAGGATTGCATACCTTTTAGGAACGTGGCTGCTCCTGTACTTGTCATTCAGCAA	0	263
GT2190	ATTAAAATTACACCAAGTTCTTTGTACTCATCTCTCTCTTTTCCTCATTACGAAGTTGTAATCACTCAAC	236	0
	ATTAAAATTACACCAAGTTCTTTGTACTCATCTCTCTCTCTTCTTCATTACGAAGTTGTAATCACTCAAC	0	224
GT2194	ATTAAAAAATTATTGTCGAAAATCAAGGGAATTGAATAATCTTAATATGACAAAGTATCATTGAGACTCC	244	0
	ATTAAAAAATTATTGTCGAAAAACAAGGGAATTGAATAATCTTAATATGACAAAGTATCATTGAGACTCC	0	256
GT2196	ATTAAGTATGGTGTGTTTTTCTCACCATCATAACAGAATTAAACCTAATTTGGTTGGGTGCTAAATAGAT	244	0
	ATTAAGTATGGTGTGTTTTTCTCACCATCATAACAGAATTAAACCTAATTTGGTTGGGTGCTAAATAGAC	0	296
GT2198	ATTAACAATACTATATTCACCTTGAATAATATCTCTATATTCACCTTGAGTAATATCTCTGGAGTTCATA	246	0
	ATTAACAATACTATATTCACCTTGAATAATATCTCTATATTCACCTTGAATAATATCTCTGGAGTTCATA	0	235
GT2200	ATTAATTCCCAACAATCAAGTTCCAATTTCCAAGGGTGGTGAATCGAATTCTTGGCCGACTTGAAAACAA	249	0
	ATTAATTCCCAACAATCAAGTTCCAATTTCCAAGGGTGGTAAATCGAATTCTTGGCCGACTTGAAAACAA	0	253
GT2202	ATTAAGACAGTTGTGTTTTTGGAGGAAAGAGCACGTGACATTCCCCCTTGCTTGAAAGAGAAGGGCGAAG	250	0
	ATTAAGAGAGTTGTGTTTTTGGAGGAAAGAGCACGTGACATTCCCCCTTGCTTGAAAGAGAAGGGCGAAG	0	220
GT2203	ATTAAGCCTGTGGATTTAAATGGTTAAATTGTTGTTGAAGTTAGTGGAAAATGGAGCTCGAAATCAAAAT	251	0
	ATTAAGCCTGTGGATTTAAATGGTTAAATTGTTGTTGAAGTTAGTGGAAAATGGAACTTGAAATCAAAAT	0	232
GT2204	ATTAATAAGGACAATTTTCAATACCATTGACTTTGTTAAAACTCCGTCATTTTTCCGCCAATTCAAAGCT	251	0
	ATTAATAAAGACAATTTTCAATACCATTGACTTTGTTAAAACTCCGTCATTTTTCCGCCAATTCAAAGCT	0	209
GT2205	ATTAAAATGGCAATCAAATAATAAGCGATTATAAGATATAATTTGTAAAAGAACTCAAACATCTCATCAA	252	0
	ATTAAAATGGCAATCAAATAATAAGTGATTATAAGATATAATTTGTAAAAGAACTCAAACATCTCATCAA	0	167
GT2206	ATTAACATAGATTTGGATAAAGGTTAAGCCAAATGGTTTTTATCACCACTGACATATTTTTATTTATTCA	252	0
	ATTAACATAGATTTGGATAAAGGTTAAGCCAAATGGTTTTTTTCACCACTGACATATTTTTATTTATTCA	0	254
GT2208	ATTAATAAGACACCTATTACATTCTGGATCTTCAACCTCTTTATTTGTTCAATTGAAAATTTGTTTTGTA	253	0
	ATTAATAAGACACCTATTACATTCTCGATCTTCAACCTCTTTATTTGTTCAATTGAAAATTTGTTTTGTA	0	269
GT2212	ATTAAAAAAATATTCAAATCTCATCATCTTATTTTTTCCGATTTTTCTTCTTCGTTCACTGTTACTTGTA	260	0
	ATTAAAAAAATATTCAAATCTCATCATCTTATTTTTTCCGATTTTTCTTCTTCTTCACTGTTACTTGTAA	0	200
GT2213	ATTAAAAAATTACAGGAAAAAAAACTGCATTTGCAAAGGCTTGAACCCAAGACCTTCAGGGGAGCACTAG	260	0
	ATTAAAAAATTACAGGAAAAAAAACTGCATTTGCAAAGGCTTGAACCCAAGACCTTCAAGGGAGCACTAG	0	100
GT2216	ATTAATAAATTGAAAACAAACTAATTTATAACAATCTCCACCTTGATTTCTATTCATCAAGAAACCAACT	263	0
	ATTAATAAATTGAAAACAAACTAATTTATAACAATCTCCAGCTTGATTTCTATTCATCAAGAAACCAACT	0	187
GT2217	ATTAATCAAAATGCACATTTCGGCAAAATTGGACTTCAAAATTGCGCCAGGCGTAATTCCTACAAAAACA	264	0
	ATTAATCAAAATGCACATTTCGGCAAAATTGGACTTCGAAATTGCGCCAGGCGCAATTCCTACAAAAACA	0	238
GT2218	ATTAATCAAAACGCGCGTTTTGGCAAAATGGACTCTAAAATTGTGCCAGACACAATTCTTGCAAAACAGA	265	0
	ATTAATCAAAACGCGCGTTTTGGCAAAATGGACTCTAAAATTGCGCCAGACACAATTCTTGCAAAACAGA	0	253
GT2219	ATTAAAATAAAAGAAAAAAAAACAAAAAACAGAACAAAAAGGAAAGAAATGGGAGGATTAACCTTTCACT	266	0
	ATTAAAATAAAAGAAAAAAAACAAAAAACAGAACAAAAAGGAAAGAAATGGGAGGATTAACCTTTCACTT	0	172
GT2223	ATTAACATTAATATCACATTTCCATACACAAATGCCCTTAATTTGACTCATAAACTACTCTCTATTTGAG	268	0
	ATTAACATTAATATCACATTTCCATACACAAATGCCCTTAATTTGACCCATAAACTACTCTCTATTTGAG	0	314
GT2224	ATTAAGAGCCGAAGGCGAAATTTCAATCTCAAAGCTTGAAGTTTTGGCAAATCAATCGATCGTTCACGTC	269	0
	ATTAAGAGCCGAAGGCGAAATTTCAATCTCAAAGCTTGAAGTTTTGGCAAATCAATCAATCGTTCACGTC	0	278
GT2226	ATTAAAAACGTTTATCATCGCACAAAGCTATACCAAAATTTTTTGTATTAGTTTTCTTTTCCTTTTGAGA	270	0
	ATTAAAAACGTTTATCATCGCACAAAGCTATACCAAAATTGTTTGTATTAGTTTTCTTTTCCTTTTGAGA	0	256
GT2229	ATTAAGGAATTTTGAAAGTTGAAGATGCAAATGGAATCTGCTGGTGCTGAATTTTGGCTTCTTCGCATTC	273	0
	ATTAAGGAATTTTGAAAGTTGAAGATGCAAATGGAATCTGCTGGTGCTAAATTTTGGCTTCTTCGCATTC	0	229
GT2230	ATTAATCTCTACTTCTTGTTGTGTGAGACCTGTGAGATTAAGAAATCTCCACAAATACCCTTATGACCTT	276	0
	ATTAATCTCTACTTCTTTGTTGTGTGAGACCTGTGAGATTAAGAAATCTCCACAAATACCCTTATGACCT	0	239
GT2231	ATTAATTCGCATCAAATCTCTCCATTTTAAAAATTAAATCCTAAACCAAAGGAATATTTTAACAGTCTTT	276	0
	ATTAATTCGCATCAAATCTCTCCATTTTAAAAATTAAATCCTAAACAAAAGGAATATTTTAACAGTCTTT	0	196
GT2232	ATTAAGACATATTACATCAAAGTGAGCATAGCTTAGCAGTAATTGGCATATATCTCCAATCAAGAAATTG	277	0
	ATTAAGACATATTACATCAAAGTGAGCATAGTTTAGCAGTAATTGGCATATATCTCCAATCAAGAAATTG	0	198
GT2234	ATTAACAAATTTTCTAACACAGAGAGCTGAAGTTTGCTGAAGTTTATTAATGATTGACTAATCAAAATAT	285	0
	ATTAACAAATTTTCTAACACAGAGAGCTGAAGTTTGCTGAAGTTTATTAATGATTTACTAATCAAAATAT	0	246
GT2235	ATTAATTTGGTGTATTATTGGGTTTGAGTTTGGGGTACCCTTCAGCCCTTTTCACAATCAAATCATACCG	286	0
	ATTAATTTGGTGTATTATTGGGTTTGAGTTTGGGGGTACCCTTCAGCCCTTTTCACAATCAAATCATACC	0	302
GT2239	ATTAAGGTACCTATCTTCGACTAAAATGTTGTGAGTTCGAATTTTCACTCTTACATTCACTTCACTTCGT	306	0
	ATTAAGGTACCTATTTTCGACTAAAATGTTGTGAGTTCGAATTTTCACTCTTACATTCACTTCACTTCGT	0	278
GT2240	ATTAAAGTGATTTTTAGTTAGTTTCTAACTTAATTCTGGTTGCCTATGGTGTAGGAAATCCTTCGGCAAG	314	0
	ATTAAAGTGATTTTTAGTTAGTTTCTAACTTAATTCTGGTTGCCTATGGTGTAGGAAATCCTTCAGCAAG	0	283
GT2242	ATTAACCATATAGGGTTTGACATTTAGTTTATATTGGTACATTTATGAAAGTATTTTGTTGTGTTGGGAG	323	0
	ATTAACCATATAGGGTTTGACATTTAGTTTATGTTGGTACATTTATGAAAGTATTTTGTTGTGTTGGGAG	0	322
GT2243	ATTAAAACTTGAATTTGTTCAGGGTGTTGATCTTGAATTTTGATTGAGGTGAGGTGACAAGTGGAGTCAA	329	0
	ATTAAAACTTGAATTTGTTCAGGGTGTTGATCTTGAATTTTGATTGAGGTGAGGTGACAGGTGGAGTCAA	0	300
GT2244	ATTAAGCTTAAAACGAGCAAATATTAAATCTGATATCAAACACAAATTTGAAGAATCAACCAACAAGATA	341	0
	ATTAAGCTTAAAACGAGCAAATATTAAATCTATATCAAACACAAATTTGAAGAATCAACCAACAAGATAT	0	292
GT2248	ATTAACTCAATCAAGATAAGCAATTTGAGCGTAGACGCCGTGCTATCTGATAGATGTAATTAAAATGATG	495	0
	ATTAACTCAATCAAGATAAGCAATTTGAGCGTAAACGCCGTACTATCTGATAGATGTAATTAAAATGATG	0	167
GT1163	ATTAAAAAATTAAATTCCATATAAAAATATATAATTTAAAATTTCGGAGAGGGAGAAATAATTACCGAAT	53	0
	ATTAAAAAAATTAAATTTCATATAAAAATATATAATTTAAAATTTCGGAGAGGGAGAAATAATTACCGAA	0	58
GT1260	ATTAAGAGGTTGTGAATTTGAATATTCACTCTAGCACATTGTTGTACTAAAAAAATGTTACTCGTAATGT	59	0
	ATTAAGAGGTTGTGAATTTGAATATTCACTCTAGCACATTGTTGTACTAAAAAAATGTTACTCGTAGTGT	0	57
GT1261	ATTAATATAAAATAAAATTGCTAAAATAGAATTCATCGTTATTATATATTATAAGATAACAATAAGATTT	59	0
	ATTAATATAAAATAAAATTGCTAAAATAGAATTCATCGTTATTATATATTATAAGATAACAATATTAAGG	0	55
GT1283	ATTAAATTTTTTTATGACTCAATTTTTTTAATAATTAAATCTCCTTCCTTTCACCTTGCACCTTTTTCTT	61	0
	ATTAAATTTTTTTATGACTCAATTTTTTTAATAATTAAATCTCCTTCCTTTCACCTTGCACCTTTTCTTC	0	69
GT1313	ATTAAAACCTTGTTGAATTATTACCTCGCACTTGAATAAACATTTATCCTAAATATTTTAAAACTTTAGC	64	0
	ATTAAAACCTTGTTGAATTATTACCTCGCACTTGAATAAACATTTATCCTAAATATTTTAAAACTTAAGC	0	59
GT1317	ATTAACTATGGAAATTTGAAGAGGAATGAATGATTATTTGAAAGGAGAAACAGAACAAAAAAAAAACAAT	64	0
	ATTAACTATGGAAATTTGAAGAGGAATGAATGATTATTTGAAAGGAGAAACAGAACAAAAAAAAACAATA	0	54
GT1325	ATTAAATTAATTTCAGGCGACTTGGGAGAATCACCATTCACCTCGGACATCTTGGAGGCTCTCATCCTTC	65	0
	ATTAAATTAATTTCAGGCGACTTGGGAGAATCACCATTCACCTCGGACATCTTGGAGGCTCCCATCCCTC	0	129
GT1326	ATTAAATTTTATATTTTTAAACGTTGAAATAAAAACTAGGAAATTTCACGTGAACCGCACGTGTTTCTTA	65	0
	ATTAAATTTTATATTTTTAAACGTTGAAATAAAAACTAGGAAATTTCACGTGAACCGAACGTGTTTCCCC	0	74
GT1354	ATTAAAAAAAAAGAACCCGACAACCCAATCCGATGCAACCCGAATTTATTGGGTTGGGTTGACCATCGTT	68	0
	ATTAAAAAAAAAGAACCCGACAACCCAATCCGATGCAACCCGAATTTATTGGGTTGGGTTGACCATCATT	0	86
GT1416	ATTAATTTAGAAACAGGAAAATGTTTATTTGTTAATTTAAATATTTTTTTTATGTTTTTTTTTATTTTTC	72	0
	ATTAATTTAGAAACAGGAAAATGTTTATTTGTTAATTTAAATATTTTTTTTATGTTTTTTTTATTTTTCT	0	72
GT1424	ATTAAGTTTTTTTTTTTTCCTTTCATTAACAGATATATTAAATTTATTTTAACCCATCAACTTAAGCTTT	73	0
	ATTAAGTTTTTTTTTTCCTTTCATTAACAGATATATTAAATTTATTTTAACCCATCAACTTAAGCTTTTA	0	88
GT1431	ATTAAGGTCGGTCTCTTAATTTTTAATTGTTACACGACTTGAAAAATAAGAGTATATAATAAATGTTGCC	74	0
	ATTAAGGTCGGTCTCTTAATTTTTAATTGTTACACGACTTGAAAAATAAGAGTATATAATAAATGTAGCC	0	65
GT1432	ATTAATTTATTTATTTATTTATTGAATTCCGTTTAGACTACAAGTCAACGAAAGAGTCTCAGTCTTATCA	74	0
	ATTAATTTATTTATTTATTGAATTCCGTTTAGACTACAAGTCAACGAAAGAGTCTCAGTCTTATCATCAA	0	63
GT1449	ATTAAAAAACATTCATCACGGTTTCAATTTGATCCCATAAATTAATAAATAAATGGGCACTTGCTATGGC	76	0
	ATTAAAAAACATTCATCACGGTTTCAATTTGATCCCATAAATTAATAAATAAATGGGCACTTGCAAATAT	0	74
GT1460	ATTAAAAAAAAATATATTGAGCATTTTTGGCGGTTTATTTTGGAGGATTCTGGCATCAAGCTATTACGTT	77	0
	ATTAAAAAAAATATATTGAGCATTTTTGGCGGTTTATTTTGGAGGATTCTGGCATCAAGCTATTACGTTA	0	101
GT1465	ATTAAAGATATATATATCAATTGTCGCTGAATTATATTTGTTTTGACGAGTGCATGTTAATTACCACTCA	77	0
	ATTAAAGATATATATATCAATTGTCGCTGAATTATATTTGCTTTGACGAGTGCATGTTAATTACCATTCA	0	54
GT1480	ATTAAAAGATCCCCATTGAAACCCATTAAAGTAAGGCCAGGGAAGCAATAAACTTTCAAAATAGAGACCA	79	0
	ATTAAAAGAAGATCCCCATTGAAACCCATTAAAGTAAGGCCAGGGAAGCAATAAACTTTCAAAATAGAGA	0	76
GT1483	ATTAAATTGAGTTAATTTAAATTTTCAATTGGTTCATTAGTCATAACAATGATATTTTGTTAATTTTCTT	79	0
	ATTAAATTGAGTTAATTTAAATTTTCAATTGGTTCATCAGTCATAACAATGATATTTTGTTAATTTTTTT	0	56
GT1487	ATTAAAAAAAAGTGCTTGGTAATAAAAACTCTTTGTTAAATGGCTTTGAAATTTCTAGAGTGTGTTTTCG	80	0
	ATTAAAAAAAAAGTGCTTGGTAATAAAAACTCTTTGTTAAATGGCTTTGAAATTTCTAGAGTGTGTTTTC	0	88
GT1564	ATTAAAAAAAAAGATGATGCTCAAAGAAAAATCACTTTAACCGTCTAGTTCGACATTCTAAAAAGTACTT	88	0
	ATTAAAAAAAAAAGATGATGCTCAAAGAAAAATCACTTTAACCGTCTAGTTCGACATTCTAAAAAGTACT	0	82
GT1602	ATTAAAAAAAAATAATTCCCAAATGGTGGAGAATTTTGATGGAACTCCTTAAAACTATGCATAAATGCTG	92	0
	ATTAAAAAAATAATAATTCCCAAATGGTGGAGAATTTTGATGGAACTCCTTAAAACTATGCATAAATGCT	0	96
GT1623	ATTAATTTAATCTATATTTTAGGATATTATACTATATTATATTTTACATTTTTCAATTCTACAAAAGTTA	95	0
	ATTAATTTAATCTATATTTTAGGATATTATACTATATTATATTTTACATTTTTCAATTCTACAAAAGGTA	0	64
GT1634	ATTAAATTTTTTTTTAAAAAAAAAAGAGAGAGAAAAAAATAAATAAATTTTGTTGTGTTGTTTCTACTGT	97	0
	ATTAAATTTTTTTTTAAAAAAAAAAGAGAGAGAAAAAAATAAATAAATTTTGTTGTGTTGTTTCTATTGT	0	51
GT1651	ATTAAGAATTACAATTGAAATCAAGCTGTTACACGAATCTTTAATATGATTTCTATGGGGCAGTTCTTTC	99	0
	ATTAAGAATTACAATTGAAATCAAGCTGTTACACGAATCTTTAATATGATTTCTATGGGGCAGTTCAGTC	0	102
GT1654	ATTAAAAATAGAGTTAACAGATAGAGTGTGCGAACTGGTAATAACAGACCATAATAGGGAAAAGTACATA	100	0
	ATTAAAAATAGAGTTAACAGATAGAGTGTGCGAACTGGTAATAACAGACCATAATAGGGAAAAGTATATA	0	91
GT1675	ATTAAGCTTATAAACACTAATTCTACCAAACTTTGTGTAATCTATTTTTAAAATTGTTTTCAAAATGTTA	102	0
	ATTAAGCTTATAAACACTAATTCTACCAAACGTTGTGTAATCTATTTTTAAAATTGTTTTCAAAATTTTA	0	77
GT1677	ATTAAAAAAAATTACTCCCAATTTTAATAAGTTTAAAAGATTATAAAGTTTGAGCTTTAATTATAATTTG	103	0
	ATTAAAAAAAAATTACTCCCAATTTTAATAAGTTTAAAAGATTATAAAGTTTGAGCTTTAATTATAATTT	0	54
GT1687	ATTAAAAAAAAAACGAAATTGTTATTAAAGCACCTCATAGATATATTTTATTGTGAGTTTTGATTTTTTT	105	0
	ATTAAAAAAAAACGAAATTGTTATTAAAGCACCTCATAGATATATTTTATTGTGAGTTTTGATTTTTTTA	0	72
GT1691	ATTAAATTTTTTTTTGGAGTATTGCAATTGAGACAAATGGTAAATATTCAAATCTAGGTTATTTAAAGGA	105	0
	ATTAAATTTTTTTTTTGGAGTATTGCAATTGAGACAAATGGTAAATATTCAAATCTAGGTTATTTAAAGG	0	82
GT1711	ATTAAAATACAATATTTTTAAAATAACTTTTATTACTAACATTATTAATAAAAAACACCCGACTTCTGTT	107	0
	ATTAAAATACAATATTTTTAAAATAACTTTTATTACTAACATTATTAATAAAAAACACCCGACTTCTATT	0	66
GT1732	ATTAAAAATTTGTTGGCTTAAAATTATAAACTACTAATAGAAATCACACGTTGAAAATCATATATATGTA	110	0
	ATTAAAAATTTGTTGGCTTAAAATTATAAACTACTAATAGAAATCACACGTTGAAAATCATATATATTTA	0	60
GT1802	ATTAAAAAAAAAGAAAATAGACGTAATAACCGTATGCGACTGTATAAGAAAGAAAATTTGAAATCTGTAT	121	0
	ATTAAAAAAAAAAGAAAATAGACGTAATAACCGTATGCGACTGTATAAGAAAGAAAATTTGAAATCTGTA	0	123
GT1809	ATTAAGAGTGCTTTTCATTTTTGCAAGGCACCCCCACCATTTCAAATATTTATATGAAGTGATCGTTCCA	122	0
	ATTAAGAGTGCTTTTCATTTTTGCAAGGCACCCCCACCATTTCAAATATTTATATGAAGTGATCGTGCCA	0	114
GT1846	ATTAATATTTTGATGATAACAAAACTATTTTTTTTATTAACAAATTTACTCTTTTCAAGTGTTCACACCA	128	0
	ATTAATATTTTGATGATAACAAAACTATTTTTTTTATTAACAAATTTACTCTTTTCAAGTGTTCACAACA	0	91
GT1854	ATTAATTTCCAAATTTTCAATTTCTAGACTCTACAAAATTCAAATTTAAAATTATATAAAATAAAAATAT	129	0
	ATTAATTTCCAAATTTTCAATTTCTAGACTCTACAAAATTCAAATTTAAAATTATATAAAATAAAAACAT	0	90
GT1856	ATTAAACTTCAATTCAAGGGCTCGTGAGCTTATTCTTGAATCAATGGTTGATACCTTCAGCTTCTTGTTT	130	0
	ATTAAACTTCAATTCAAGGGCTCGTGAGCTTATTCTTGAATCAATGGTTGATACCTTCAGCTTCTTGCTT	0	136
GT1861	ATTAAAAAAAATTCATTTTACCTCCACCGAAAAATGCTCAAACCTAATTGAACACATAATTAATCAAATT	131	0
	ATTAAAAAAAAATTCATTTTACCTCCACCGAAAAATGCTCAAACCTAATTGAACACATAATTAATCAAAT	0	175
GT1869	ATTAAATTTTTTTTTTTAATGATGTTGCACTTTTTAAAGTTATCATTCTCATTTATTTCTAGAGTACAGA	132	0
	ATTAAATTTTTTTTTTAATGATGTTGCACTTTTTAAAGTTATCATTCTCATTTATTTCTAGAGTACAGAG	0	105
GT1906	ATTAACAAAACAAATATTATTTCTTGTGATAATTTTGACCAAAATGCACTCATAAAAACACATCTTACAA	139	0
	ATTAACAAAACAAATATTATTTCTTGTGATAATTTTGACCAAAATGCACTCATAAAAACACATCTTTCAA	0	116
GT1929	ATTAATTGACAGATCGAAAGTTTGAATCACCGTGCTAAATGCGGTTGAACTAAAATATATATATATAGCC	142	0
	ATTAATTGACAGATCGAAAGTTTGAATCACCGTGCTAAATGCGGTTGAACTAAAATATATATATATATAG	0	116
GT1962	ATTAAATTTTTTTTTTAACAAAAACATTTTCCCACTCACACCTCTAATGGCAACACTCTGTCTAAAGCAA	148	0
	ATTAAATTTTTTTTTTTAACAAAAACATTTTCCCACTCACACCTCTAATGGCAACACTCTGTCTAAAGCA	0	138
GT1985	ATTAATTTGGGCGAATCTATTATTTGTTTAACTCAACTTTATGGAGTACCTTTTTTATTTTTTTTTTAAT	152	0
	ATTAATTTGGGCGAATCTATTATTTGTTTAACTCAACTTTATGGAGTACCTTTTTTTTTTTTTTTTTTTT	0	96
GT2004	ATTAAAAAAATTAAATGAAAAAAAAATCTCCTGATTCGAGACTAACTAACCTGAGGGACTCGGGGCGCTA	160	0
	ATTAAAAAAAATTAAATGAAAAAAAAATCTCCTGATTCGAGACTAACTAACCTGAGGGACTCGGGGCGCT	0	122
GT2033	ATTAAAAACTTTGTGAAATATATGGACTAAACAAATACAACTTCGAAAGTTTATGCACTTATTAATGTAG	169	0
	ATTAAAAACTTTGTGAAATATATGGACTAAACAAATACAACTTCGAAAGTTTATGCACTTATTAGAGTAG	0	165
GT2049	ATTAATTTTCATTCACTAACCCAAGGTTACTTCACTATAAATCCGAAGTTGCACACTTCACAAGTTGTTC	172	0
	ATTAATTTTCATTCACTAACCCAAGGTTACTTCACTATAAATCCGAAGTTGCACACTTCACAATCCGCTT	0	133
GT2055	ATTAAAAAAGTTATGGATCTCATCAATAAAGAGAAAGAAAAGGTAAAAGTAGTAAAGTAACTATAATAAA	175	0
	ATTAAAAAAGTTATGGATCTCATCAATAAAGAGAAAGAAAAGGTAAAAGTAGTAAAGTAACTAATAAATG	0	101
GT2060	ATTAATTTATTTTCCATTCCACTAAGACATTTAAAGTTCAACTTCAAGCTGCCCCCAGTCTTCTCAAACC	176	0
	ATTAATTTATTTTCCATTCCACTAAGACATTTAAAGTTCAACTTCAAGCTGCCCCCAGTCTTCTCATACC	0	238
GT2108	ATTAATATTCGATCATAATATATGCTTGTTTAGAATTATTAATGAAACGTTAATAGTAATGACAAATAAA	191	0
	ATTAATATTCGATCATAATATATGCTTGTTTAGAATTATTAATGAAACGTTAATAGTAATGACAAATCAA	0	157
GT2121	ATTAAAAAATCTTAAATCTCTAGATTATTTGTCAATCATTTTGATTTTGAATTTGACCAAACTGTTTCGA	196	0
	ATTAAAAAATCTTAAATCTCTAGATTATTTGTCAATCATTTTGATTTTGAATTTGACCAAACTGTTTTGA	0	111
GT2174	ATTAATTTAGTAGATATATATGTTTGCACTCTTAAATAATAAATAACTGGTATTCGTTATCTTTCAAATT	221	0
	ATTAATTTAGTAGATATATATGTTTGCACTCTTAAATAATAAATAACTGGTATTCGTTATCTTTCACATT	0	125
GT2181	ATTAACCACTTTCTCGATTGGTTATGGATACAGACGTCTAGAGAGCGAGAAAGGGAGAAAGATAGTGTAT	226	0
	ATTAACCACTTTCTCGATTGGTTATGGATACAGACGTCTAGAGAGCGAGAAAGGGAGAAAGATAGTTTAT	0	149
GT2209	ATTAAAAATCTATTTTTTTGCTCTCCAAAGAGTCACCGTTCAAAGACCAATTACAAGTCCAAGCAGGAAT	259	0
	ATTAAAAATCTATTTTTTTGCTCTCCAAAGAGTCACCGTTCAAAGACCAATTACAAGTCCAACTAGGAAT	0	262
