# Supplementary material for: Mapping of the Gynoecy in Bitter Gourd (Momordica charantia) Using RAD-Seq Analysis
Source: PLoS One. 2014 Jan 30;9(1):e87138. doi: 10.1371/journal.pone.0087138 (PMC3907450; doi:10.1371/journal.pone.0087138)
Supplement: Table S4 — Orders and Genetic distances among the co-dominant markers in each linkage group. (XLSX) [file pone.0087138.s007.xlsx]

## Sheet: Sheet1
Table S4 Orders and Genetic distances among the co-dominant markers in each linkage group
<Group1>
Marker	cM
GT2093	0
GT1884	1.05
GT2106	1.05
GT1207	3.15
GT2095	7.41
GT1319	9.51
GT1902	11.62
GT1923	12.66
GT1552	13.71
GT2092	13.71
GT1588	15.82
GT2231	20.08
GT1273	21.13
GT1921	21.13
GT2036	26.51
GT1504	33.02
GT1654	37.29
GT1546	39.4
GT1984	39.4
GT1708	45.9
GT2194	59.61
GT1957	61.72
GT1677	76.84
GT1883	77.89
GT1125	91.6
GT1791	95.85
GT1225	99.02
GT1519	102.2
GT1617	104.31
GT1855	104.31
GT1858	104.31
GT2203	104.31
GT1263	108.58
GT2137	112.85
GT1951	116.04
GT1527	119.22
GT1941	133.9
GT1311	142.55
GT1307	145.71
GT1998	163.52
Mcgy	176.29
<Group2>
Marker	cM
GT1496	0
GT1440	3.18
GT2127	6.36
GT2143	11.74
GT1564	14.92
GT2206	20.28
GT2124	21.33
GT1877	22.38
GT2007	33.46
GT1711	43.32
GT1969	53.27
GT1596	58.64
GT1612	67.41
GT1312	68.46
GT1594	68.46
GT1779	68.46
GT1834	68.46
GT2239	70.57
GT1476	79.36
GT1662	85.88
GT1825	87.99
GT1804	92.26
GT1304	96.52
GT1898	98.63
GT1726	106.27
GT2123	106.27
GT1944	113.89
GT1442	123.8
GT1760	128.06
GT1990	128.06
GT2175	128.06
GT1236	129.11
GT1566	129.11
GT1573	129.11
GT1698	129.11
GT2034	129.11
GT2079	129.11
GT2116	129.11
GT2140	129.11
GT2142	129.11
GT2179	129.11
GT1611	130.16
GT1886	131.2
GT1320	132.25
GT1980	132.25
GT2240	132.25
GT1153	135.43
GT1643	135.43
GT1806	135.43
GT1444	137.54
GT1441	141.81
GT1565	144.99
GT1198	161.06
GT1702	161.06
GT1563	165.3
GT1465	167.4
GT1423	168.45
GT1771	168.45
GT1272	172.7
GT1971	173.74
GT1583	176.91
GT1280	179.02
GT1373	189.96
GT1297	199.77
GT1746	199.77
GT1979	199.77
GT2058	199.77
GT2177	199.77
GT2204	200.82
GT1870	203.99
GT1534	207.15
GT1649	213.62
GT1839	215.72
GT1378	216.77
GT1785	223.23
GT1432	230.79
GT1460	237.24
GT1982	242.6
GT2134	243.64
GT1150	244.69
GT1843	244.69
GT1397	246.8
GT2062	255.64
GT2110	257.75
GT2115	257.75
GT2224	257.75
GT1568	259.86
GT1591	260.91
GT1500	263.02
GT1866	266.2
GT1126	327.79
<Group3>
Marker	cM
GT1862	0
GT2152	2.11
GT1645	4.22
GT1684	5.27
GT1597	7.37
GT2168	13.87
GT1585	21.5
GT2019	24.68
GT1217	25.72
GT1140	26.77
GT1828	26.77
GT2109	26.77
GT1787	27.82
<Group4>
Marker	cM
GT1310	0
GT1412	2.11
GT1445	2.11
GT1452	2.11
GT1678	2.11
GT1680	2.11
GT1822	2.11
GT1909	2.11
GT1968	2.11
GT2016	2.11
GT2135	2.11
GT2166	2.11
GT2182	2.11
GT2218	2.11
GT2070	3.16
GT2185	3.16
GT2188	3.16
GT2049	3.16
GT1561	4.21
GT1724	4.21
GT2202	5.25
GT1242	6.3
GT1584	6.3
GT1580	7.35
GT2244	9.46
GT2052	12.65
GT1143	13.69
GT1593	15.8
GT2003	15.8
GT1251	16.85
GT2053	16.85
GT1578	20.03
GT1165	21.07
GT1671	23.18
GT1530	29.67
GT2131	30.72
<Group5>
Marker	cM
GT1851	0
GT1732	6.54
GT1603	19.2
GT1492	24.58
GT1879	25.63
GT2243	31.01
GT1394	32.05
GT1413	37.41
GT1609	46.13
GT1532	48.23
GT1947	53.57
GT1416	54.62
GT1147	63.31
GT1807	63.31
GT1386	69.8
GT1458	72.98
GT1854	72.98
GT1959	74.02
GT1290	78.3
GT1733	78.3
GT1967	80.41
GT1929	84.69
GT1157	93.58
GT1847	93.58
GT1835	101.21
GT1939	101.21
GT2190	101.21
GT1144	103.31
GT1428	108.65
GT1462	108.65
GT2186	108.65
GT1542	111.82
GT1977	112.87
GT1665	113.92
GT1689	125.11
GT2056	126.16
<Group6>
Marker	cM
GT1808	0
GT1653	4.27
GT1700	7.45
GT2097	9.56
GT2060	11.67
GT1778	14.86
GT2178	16.96
GT1367	24.65
GT1529	30.06
GT1878	38.95
GT1480	39.99
GT1339	47.64
GT1209	60
GT1950	66.49
GT1620	74.14
GT1581	79.53
GT1686	81.64
GT2091	81.64
GT2005	88.15
GT2126	98.23
GT1276	107.17
GT1522	113.72
GT2180	113.72
GT2187	114.76
GT1331	117.95
GT1691	120.07
GT1558	121.11
GT1499	124.3
GT1579	124.3
GT1145	128.58
<Group7>
Marker	cM
GT2216	0
GT2125	1.05
GT1755	2.09
GT2102	3.14
GT1590	5.24
GT1953	9.49
GT2208	9.49
GT2213	9.49
GT1888	12.66
GT1158	26.13
GT1978	28.23
GT1728	30.33
GT2017	30.33
GT2183	48.46
GT2189	50.56
GT1374	55.88
GT1994	57.98
GT1512	63.3
GT1696	67.55
GT1841	69.65
GT2011	69.65
GT2129	69.65
GT2242	69.65
GT1932	75.01
GT1220	80.38
GT1553	80.38
<Group8>
Marker	cM
GT1824	0
GT1270	3.19
GT1509	3.19
GT1514	10.86
GT1451	11.91
GT1782	11.91
GT1616	16.18
GT1341	17.23
GT1892	30.88
GT1505	34.05
GT1183	35.1
GT2035	39.36
GT1769	43.63
GT1863	46.81
GT1375	47.85
GT1418	47.85
GT1507	47.85
GT1518	47.85
GT1533	47.85
GT1543	47.85
GT1548	47.85
GT1621	47.85
GT1631	47.85
GT1632	47.85
GT1648	47.85
GT1676	47.85
GT1679	47.85
GT1723	47.85
GT1734	47.85
GT1811	47.85
GT1827	47.85
GT1849	47.85
GT1896	47.85
GT1899	47.85
GT1948	47.85
GT1949	47.85
GT1952	47.85
GT1999	47.85
GT2022	47.85
GT2050	47.85
GT2066	47.85
GT2072	47.85
GT2081	47.85
GT2085	47.85
GT2104	47.85
GT2144	47.85
GT2217	47.85
GT2223	47.85
GT2226	47.85
GT2230	47.85
GT2055	47.85
GT1186	48.9
GT2160	48.9
GT2108	48.9
GT1485	51.01
GT1876	53.11
GT2205	55.22
GT2121	57.32
GT1587	59.42
GT1288	63.67
GT1582	72.3
GT1434	78.73
GT1347	82.99
GT1865	103.36
GT1857	125.06
GT2054	142.18
GT2132	148.66
GT1506	150.76
GT1660	151.81
GT1842	151.81
GT2061	151.81
GT2088	152.86
GT2219	152.86
GT1586	154.96
GT1410	160.32
GT2004	160.32
GT1407	165.7
GT1722	165.7
GT1856	165.7
GT1943	166.75
GT1193	169.93
GT1737	169.93
GT2009	172.04
GT2100	172.04
GT1613	179.7
GT1912	182.88
GT1987	182.88
GT1831	183.92
GT1837	187.1
GT1228	203.26
GT1604	219
GT1606	228.86
GT1743	234.22
GT1983	234.22
GT2068	234.22
GT2141	234.22
GT1636	235.27
GT1483	242.91
GT2073	251.74
GT2033	251.74
GT1317	252.78
GT1802	260.39
GT1354	275.22
GT2032	277.32
GT1602	277.32
GT1927	282.7
<Group9>
Marker	cM
GT1222	0
GT2043	4.26
GT1570	5.31
GT2029	8.49
GT1466	12.77
GT1836	20.46
GT2037	20.46
GT1400	21.51
GT1861	22.56
GT1910	23.6
GT1906	23.6
GT1329	34.92
GT1332	39.19
<Group10>
Marker	cM
GT2232	0
GT1379	1.05
GT1669	1.05
GT1765	1.05
GT1247	2.1
GT2001	3.14
GT2027	7.42
GT1635	15.07
GT1703	18.26
GT1667	25.97
GT2040	30.25
GT1647	31.3
GT1491	32.35
GT1816	37.74
GT1261	43.14
GT1988	44.19
GT1634	44.19
GT2094	45.24
GT1745	46.29
GT2229	51.69
GT1238	53.8
GT2157	62.62
GT1326	63.66
GT1750	66.84
GT1823	82.91
GT2018	103.09
GT1340	105.2
GT1258	116.47
GT2120	117.52
<Group11>
Marker	cM
GT1362	0
GT1763	4.27
GT1569	5.31
GT1605	15.29
GT2170	18.46
GT1819	27.26
GT1502	33.75
GT1820	33.75
GT2156	34.8
GT1738	44.77
GT1601	57.19
GT1687	58.23
GT1538	70.65
GT1965	72.75
GT1285	73.8
GT1710	73.8
GT1753	73.8
GT1623	75.91
GT1253	76.95
GT2151	81.23
<Group12>
Marker	cM
GT2153	0
GT1985	4.28
GT2196	6.39
GT1361	12.89
GT1735	12.89
GT2209	12.89
GT1526	20.55
GT1809	22.66
GT1997	33.82
GT2164	33.82
GT1292	37
GT1498	37
GT1889	41.25
GT2174	47.71
GT1619	64.28
GT1575	80.85
GT2099	81.89
GT1275	93.02
GT1693	93.02
GT1890	93.02
GT1897	93.02
GT2107	95.12
GT1495	100.51
GT1786	100.51
GT2015	100.51
GT1767	105.89
GT1674	112.43
GT1457	114.54
GT1490	122.25
GT2167	123.3
GT2200	136.01
GT1821	141.42
GT1313	144.6
GT1255	145.65
GT2149	148.84
GT1449	148.84
GT1992	149.89
GT1431	158.77
GT2077	159.82
GT1962	171.18
<Group13>
Marker	cM
GT2119	0
GT2176	0
GT1736	2.1
GT1768	2.1
GT2074	2.1
GT1869	2.1
GT2089	3.15
GT1425	9.62
GT1974	16.11
GT2069	19.28
GT2184	24.63
GT1470	38.27
GT1268	44.77
GT1510	53.59
GT1707	55.7
GT1773	68.31
GT1908	75.97
GT1731	77.02
GT1283	77.02
GT1259	78.06
GT1486	78.06
GT1815	78.06
GT1369	80.17
GT1630	84.43
GT1487	87.62
GT1788	90.8
GT1814	90.8
GT1641	92.91
GT1719	92.91
GT1380	93.95
GT1864	93.95
GT2063	93.95
GT1365	95
GT2080	97.11
GT1895	105.89
GT1794	112.35
GT2212	118.8
GT1741	121.97
GT1761	127.3
GT2234	129.4
GT1651	133.64
GT2028	137.89
GT1692	146.67
GT2047	148.78
<Group14>
Marker	cM
GT1286	0
GT1372	11.05
GT1453	13.16
GT1868	13.16
GT1882	13.16
GT1917	13.16
GT1956	13.16
GT1325	13.16
GT1846	13.16
GT2181	13.16
GT1576	14.2
<Group15>
Marker	cM
GT1598	0
GT2013	8.8
GT1303	17.58
GT1795	18.62
GT2138	29.82
GT1705	30.87
GT1644	35.13
GT2173	35.13
GT1840	43.91
GT2084	43.91
GT1937	48.17
GT1541	49.22
GT1571	51.32
GT1675	57.8
GT1930	58.84
GT1299	64.2
GT1574	68.47
