# Supplementary material for: Mapping of the Gynoecy in Bitter Gourd (Momordica charantia) Using RAD-Seq Analysis
Source: PLoS One. 2014 Jan 30;9(1):e87138. doi: 10.1371/journal.pone.0087138 (PMC3907450; doi:10.1371/journal.pone.0087138)
Supplement: Table S5 — Female flower frequency and GTFL-1 genotype in 160 F2 plants from OHB61-5 x OHB95-1A. (XLSX) [file pone.0087138.s008.xlsx]

## Sheet: Sheet1
Table S5 Female flower frequency and GTFL-1 genotype in 160 F2 plants from OHB61-5 x OHB95-1A
ID of F2 plants	Frequency of female flowers (%)*	SNP-type of GTFL-1**
1	0	A
2	20	H
3	100	G
4	25	G
5	5	H
6	15	H
7	5	A
8	95	G
9	100	G
10	5	H
11	10	H
12	0	A
13	15	H
14	35	H
15	100	G
16	15.7895	H
17	25	H
18	100	G
19	5	H
20	5	A
21	55	H
22	35	H
23	10	H
24	0	H
25	100	G
26	100	G
27	100	G
28	0	A
29	25	H
30	0	A
31	100	G
32	35	H
33	10	H
34	95	G
35	25	H
36	15	H
37	100	G
38	100	G
39	10	H
40	5	H
41	100	G
42	90	G
43	65	A
44	10	H
45	33.3333	H
46	100	G
47	25	A
48	5	A
49	0	H
50	5.55556	A
51	10	A
52	15	H
53	5	H
54	10	H
55	100	G
56	0	A
57	5	A
58	20	A
59	5	A
60	38.8889	H
61	0	A
62	10	A
63	100	G
64	35	H
65	0	A
66	70	H
67	90	G
68	0	A
69	100	G
70	15	H
71	5	A
72	25	H
73	100	G
74	0	H
75	0	A
76	5	A
77	0	A
78	10	H
79	10	A
80	5	A
81	100	G
82	71.4286	H
83	40	H
84	15	H
85	100	G
86	15	H
87	30	H
88	30	G
89	10	H
90	0	A
91	100	G
92	0	A
93	100	G
94	15	H
95	20	H
96	5.88235	A
97	20	H
98	15	H
99	100	G
100	15	A
101	45	H
102	29.4118	A
103	0	A
104	30	H
105	25	H
106	10	H
107	100	G
108	0	H
109	100	G
110	5	H
111	20	G
112	10	H
113	25	H
114	5	H
115	10	H
116	35	H
117	20	H
118	30	H
119	100	G
120	100	G
121	20	G
122	20	H
123	0	A
124	5	A
125	35	H
126	15	H
127	25	H
128	20	H
129	0	A
130	17.6471	H
131	45	H
132	0	A
133	10	H
134	5	A
135	10	H
136	0	H
137	100	G
138	45	H
139	30	H
140	10	H
141	26.3158	H
142	35	H
143	100	G
144	5	A
145	100	G
146	0	A
147	5	H
148	5	H
149	26.3158	A
150	0	A
151	5	H
152	20	H
153	20	H
154	0	A
155	35	H
156	5	H
157	0	A
158	10	H
159	20	H
160	100	G
* Calculated from the number of female flowers per twenty flowers in each F2 plant.
** "G": OHB61-5-type, "A": OHB95-1A-type, "H": heterozygote
